# Supplementary material for: Consecutive N2 loss from a uranium diphosphazide complex
Source: Royal Society of Chemistry journal article supplement (doi:10.1039/c9dt04517a), 2019-12-06
Supplement: c9dt04517a1.pdf [file c9dt04517a1.pdf]

## Electronic Supporting Information

### Consecutive N<sub>2</sub> Loss from a Uranium Diphosphazide Complex

Tara K. K. Dickie, Connor S. MacNeil and Paul G. Hayes\*

#### Experimental Details

All air and moisture sensitive manipulations were carried out under an inert atmosphere of argon either on a double manifold vacuum line or in an MBraun glove box. Solvents used for these manipulations were purified by an MBraun solvent purification system, stored in PTFE-sealed glass vessels and stored over sodium benzophenone ketyl (THF) or “titanocene” (pentane, heptane, benzene, toluene). Deuterated solvents were dried over sodium benzophenone ketyl (benzene-*d*<sub>6</sub>, THF-*d*<sub>8</sub>) or CaH<sub>2</sub> (chloroform-*d*<sub>1</sub>). Solvents were degassed by three freeze-pump-thaw cycles, distilled and stored over 4 Å molecular sieves in PTFE-sealed glass vessels under argon. All NMR spectra were recorded at ambient temperature with a Bruker Avance II (300.13 MHz for <sup>1</sup>H, 75.47 MHz for <sup>13</sup>C, 121.49 MHz for <sup>31</sup>P) NMR spectrometer at ambient temperature. Chemical shifts are reported in parts per million (ppm) relative to the external standards SiMe<sub>4</sub> (<sup>1</sup>H, <sup>13</sup>C), and 85% H<sub>3</sub>PO<sub>4</sub> (<sup>31</sup>P). Internal references were from residual <sup>1</sup>H and <sup>13</sup>C signals in C<sub>6</sub>D<sub>5</sub>H (δ 7.16, 128.1), CHCl<sub>3</sub> (δ 7.26, 77.16) and THF (δ 1.72 and 3.58, 67.21 and 25.31), respectively (s = singlet, d = doublet, t = triplet, q = quartet, sp = septet, m = multiplet, br = broad, ov = overlapping signals). NMR assignments were aided by the use of <sup>13</sup>C{<sup>1</sup>H}-DEPT-90, <sup>13</sup>C{<sup>1</sup>H}-DEPT-135, <sup>1</sup>H-<sup>13</sup>C{<sup>1</sup>H}-HSQC, <sup>13</sup>C{<sup>1</sup>H} APT and <sup>1</sup>H-<sup>1</sup>H-COSY experiments. IR measurements were carried out on a Bruker Tensor 37 FT Infrared spectrometer (vs = very sharp, s = sharp, w = wide, vw = very wide, ov = overlapping). Elemental analyses (EA) were performed using an Elementar Vario Microcube instrument. The compound 2-azidoaniline was prepared according to Driver *et al.*<sup>1</sup> UCl<sub>4</sub>(dme)<sub>2</sub> was prepared by a modified literature procedure.<sup>2</sup> 18-crown-6 was purchased from Strem Chemicals, Inc. and recrystallized from acetonitrile before use. All other materials were purchased from commercial sources (*e.g.* Sigma Aldrich, Alfa Aesar, Cambridge Isotopes Laboratories, etc.) and used as received.

**Note 1:** All uranium compounds in this paper are paramagnetic. For paramagnetic compounds,  $w_{1/2}$  denotes width at half height in hertz.

**Note 2:** Organic azides are both toxic and explosive. Care should be taken while handling azides, particularly if they are solvent free and/or at elevated temperatures.

**Note 3:** Phosphines are toxic and care should be taken while handling.

**Note 4:** <sup>238</sup>U is a weak α-emitter with a half life of 4.47 x 10<sup>9</sup> years.

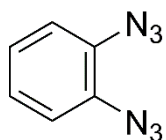

**1,2-diazidobenzene:** A solution comprised of 35 mL of 1M HCl and 30 mL of distilled H<sub>2</sub>O was added to 2-azidoaniline<sup>2</sup> (0.510 g, 3.80 mmol) in a 250 mL round-bottomed flask equipped with a Teflon<sup>®</sup> coated stir bar. The solution was stirred at ambient temperature until the solid was dissolved, after which the mixture was cooled to -5 °C using an ice/salt water bath. Solid NaNO<sub>2</sub> (0.500 g, 7.247 mmol) was added to the flask and the reaction mixture was stirred at -5° C for 1 hour. The solution was treated with a 5 mL aqueous solution of NaN<sub>3</sub> (470 mg, 7.23 mmol) and stirred for 2 hours, after which a light orange solid was isolated by cold filtration. The resulting product was a red oil at ambient temperature. Yield: 0.523 g (85.9%). Single crystals suitable for X-ray diffraction were obtained from a solution of petroleum ether at -35 °C. <sup>1</sup>H NMR (chloroform-*d*<sub>1</sub>, 300.13 MHz): δ 7.07 (ov m, 4H, Ph CH). <sup>13</sup>C{<sup>1</sup>H} NMR (chloroform-*d*<sub>1</sub>, 75.47 MHz): δ 131.22 (s, CN<sub>3</sub>), 126.02 (s, Ph CH), 120.30 (s, Ph CH). IR (neat): ν<sub>max</sub> (cm<sup>-1</sup>) 2089 (vw), 1589 (s), 1488 (s), 1448 (s), 1297 (w), 1273 (w), 1154 (s), 1145(s), 1085 (s), 744 (s), 697 (s), 647 (s), 527 (s).

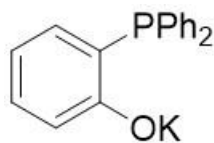

**(2-OK-C<sub>6</sub>H<sub>4</sub>)PPh<sub>2</sub>:** In an inert atmosphere glove box, 2-(diphenylphosphino)phenol (0.1185 g, 0.426 mmol) and KH (0.0188 g, 0.468 mmol) were combined in a 20 mL scintillation vial equipped with a Teflon<sup>®</sup> coated stir bar. The solids were dissolved in 8 mL of THF and gas evolution was observed from the cloudy solution. The reaction mixture was stirred for 15 minutes at ambient temperature until gas evolution ceased and the solution became clear and colourless. The reaction was stirred for another 18 hours and the solvent was removed *in vacuo* to produce a white solid (0.1297 g, 96.2% yield) <sup>1</sup>H NMR (THF-*d*<sub>8</sub>, 300.13 MHz): δ 7.25-7.16 (m, 10H, Ar CH), 6.87 (td, 1H, <sup>3</sup>J<sub>HH</sub> = 7.5 Hz, <sup>4</sup>J<sub>HH</sub> = 1.9 Hz, Ar CH), 6.41 (ddd, 1H, <sup>3</sup>J<sub>HP</sub> = 6.3 Hz, <sup>3</sup>J<sub>HH</sub> = 7.5 Hz, <sup>4</sup>J<sub>HH</sub> = 1.9 Hz, Ar CH), 6.03 (m, 2H, Ar CH) . <sup>13</sup>C{<sup>1</sup>H} NMR (THF-*d*<sub>8</sub>, 75.47 MHz): δ 174.63 (d, <sup>1</sup>J<sub>CP</sub> = 19.2 Hz), 140.63 (d, <sup>1</sup>J<sub>CP</sub> = 10.3 Hz), 134.77 (d, <sup>2</sup>J<sub>CP</sub> = 18.8 Hz), 134.39 (s), 131.69 (s), 129.11 (d, <sup>3</sup>J<sub>CP</sub> = 6.7 Hz), 128.80 (s), 123.39 (d, <sup>2</sup>J<sub>CP</sub> = 7.7 Hz), 118.32 (s), 111.33 (s). <sup>31</sup>P{<sup>1</sup>H} (THF-*d*<sub>8</sub>, 121.49 MHz) δ -19.14 (s). Anal. Calcd. (%) for C<sub>18</sub>H<sub>14</sub>KOP: C: 68.33; H: 4.46. Found C: 68.09; H: 4.61.

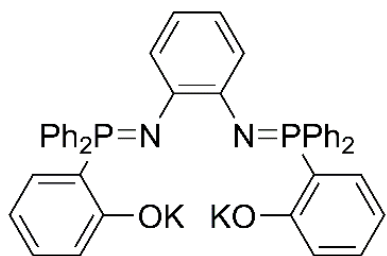

**K<sub>2</sub>L:** In an inert atmosphere glove box, 1,2-diazidobenzene (0.0544 g, 0.339 mmol) was dissolved in 1 mL of THF in a 20 mL scintillation vial. The 1,2-diazidobenzene solution was added to a stirring THF (8 mL) solution of (2-OK-C<sub>6</sub>H<sub>4</sub>)PPh<sub>2</sub> (0.2145 g, 0.678 mmol). The reaction mixture was stirred at 50 °C for 8 hours to ensure full conversion to K<sub>2</sub>L resulting in a clear, orange solution. The THF was removed *in vacuo* to give a bright yellow solid (0.2500 g, 99.8% yield). <sup>1</sup>H NMR (THF-*d*<sub>8</sub>, 300.13 MHz): δ 7.86-7.78 (ov m, 8H, Ar CH), 7.42-7.33 (ov m, 14H, Ar CH), 7.00-6.85 (m, 4H, Ar CH), 6.58 (br s, 2H, Ar CH), 6.15-6.07 (m, 4H, Ar CH). <sup>13</sup>C{<sup>1</sup>H} NMR (THF-*d*<sub>8</sub>, 75.47 MHz): δ 176.19 (d, <sup>1</sup>J<sub>CP</sub> = 4.8 Hz), 147.6 (d, <sup>1</sup>J<sub>CP</sub> = 23.0 Hz), 136.66 (s), 136.08 (d, <sup>2</sup>J<sub>CP</sub> = 9.0 Hz), 135.24 (s), 134.43 (s), 132.43 (d, <sup>2</sup>J<sub>CP</sub> = 9.4 Hz), 130.94 (s), 128.78 (d, <sup>3</sup>J<sub>CP</sub> = 11.6 Hz), 121.16 (s), 119.34 (s), 119.19(s), 116.54 (s),

109.77 (s), 109.61 (s).  $^{31}\text{P}\{^1\text{H}\}$  (THF- $d_8$ , 121.49 MHz)  $\delta$  11.42 (s). Anal. Calcd. (%) for  $\text{C}_{42}\text{H}_{32}\text{K}_2\text{N}_2\text{O}_2\text{P}_2$ : C: 68.46; H: 4.38; N: 3.80. Found C: 67.83; H: 5.12; N: 3.90.

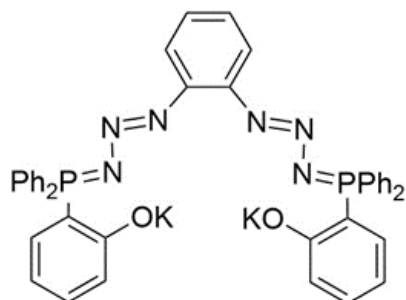

$\text{K}_2\text{L}''$ : In an inert atmosphere glove box, 1,2-diazidobenzene (0.0579 g, 0.362 mmol) was dissolved in 2 mL of toluene and added to a stirring toluene (8 mL) solution of (2-OK- $\text{C}_6\text{H}_4$ ) $\text{PPh}_2$  (0.2288 g, 0.723 mmol). A bright yellow precipitate formed immediately upon addition of the diazide. The reaction mixture was stirred at ambient temperature for 15 minutes. The solution was decanted from the precipitate and the remaining solvent removed *in vacuo* to afford a bright yellow solid. The resulting product was washed with pentane ( $3 \times 1$  mL) (0.2138 g, 75% yield).  $^1\text{H}$  NMR (THF- $d_8$ , 300.13 MHz):  $\delta$  7.77-7.71 (ov m, 6H, Ar CH), 7.60-7.54 (m, 2H, Ar CH), 7.36-7.34 (m, 4H, Ar CH), 7.24-7.07 (ov m, 10H, Ar CH), 7.02-6.94 (m, 2H, Ar CH), 6.87-6.84 (m, 2H, Ar CH), 6.60-6.49 (m, 2H, Ar CH), 6.20-6.15 (m, 2H, Ar CH), 5.94-5.92 (m, 2H, Ar CH).  $^{31}\text{P}\{^1\text{H}\}$  (THF- $d_8$ , 121.49 MHz)  $\delta$  28.34 (br s).  $^{13}\text{C}$  data is unavailable due to decomposition in solution and low solubility in common organic solvents. Anal. Calcd. (%) for  $\text{C}_{42}\text{H}_{32}\text{K}_2\text{N}_6\text{O}_2\text{P}_2$ : C: 63.62; H: 4.07; N: 10.60. Found C: 62.73; H: 4.41; N: 10.73.

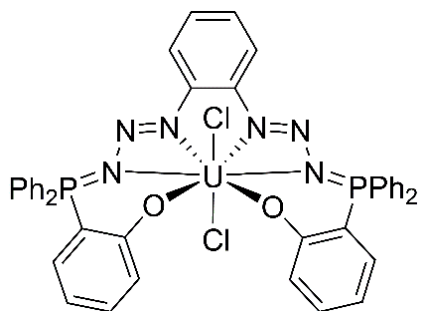

**Complex 1:** In an inert atmosphere glove box, solid  $\text{K}_2\text{L}''$  (0.0443g, 0.0559 mmol) and  $\text{UCl}_4$  (0.0212g, 0.0558 mmol) were added to a 20 mL scintillation vial containing 3 mL THF. The mixture was agitated for 30 seconds until the all  $\text{K}_2\text{L}''$  had been consumed and a dark orange solution prevailed. Toluene (3 mL) was added to the solution to precipitate KCl and the THF/toluene solution was filtered quickly through Celite<sup>®</sup>. The solvent was removed *in vacuo* to afford an orange-brown solid (0.0377g 66.0% yield). Suitable crystals for X-ray diffraction were obtained in benzene- $d_6$  by leaving the solution at ambient temperature for 6 hours. Due to decomposition of 1 to 2 in solution, NMR spectra of compound **1** contain an impurity of **2**.  $^1\text{H}$  NMR (THF- $d_8$ , 300.13 MHz):  $\delta$  24.55 ( $w_{1/2} = 16.2$  Hz), 19.88 ( $w_{1/2} = 11.6$  Hz), 16.89 ( $w_{1/2} = 27.0$  Hz), 14.07 ( $w_{1/2} = 16.1$  Hz), 12.81 ( $w_{1/2} = 11.4$  Hz), 12.52 ( $w_{1/2} = 15.7$  Hz), 12.02 ( $w_{1/2} = 24.1$  Hz), 7.55 ( $w_{1/2} = 10.8$  Hz), 7.31 ( $w_{1/2} = 16.8$  Hz).  $^{31}\text{P}\{^1\text{H}\}$  NMR (THF- $d_8$ , 121.49 MHz):  $\delta$  49.61 (s, 2P,  $\text{PN}_3$ ). Anal. Calcd. (%) for  $\text{C}_{42}\text{H}_{32}\text{N}_6\text{O}_2\text{P}_2\text{U}$ : C: 49.28; H: 3.15; N: 8.21. Found C: 49.17; H: 3.39; N: 8.22.

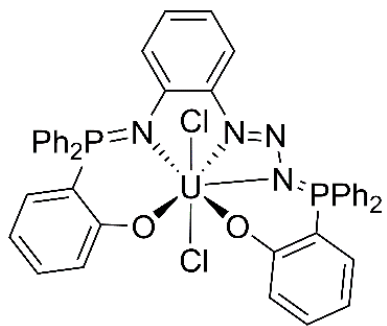

**Complex 2:** Synthesis 1- In an inert atmosphere glove box, solid  $K_2L''$  (0.010 g, 0.0130 mmol) and  $UCl_4(dme)_2$  (0.0073 g, 0.0130 mmol) were added to a J. Young NMR tube containing 0.5 mL of THF- $d_8$ . The mixture was agitated for 2 minutes during which all of  $K_2L''$  had been consumed and a dark orange solution prevailed. The solution was heated for 12 hours at 45 °C to ensure full conversion of **1** to **2**. Crystals suitable for X-ray diffraction were obtained at ambient temperature from benzene after 24 hours. An isolated yield could not be determined due to

persistent impurities (complex **4**).

Synthesis 2- In an inert atmosphere glove box, solid Complex **1** (0.0377g, 0.0369 mmol) was added to a 20 mL scintillation vial containing 3 mL THF and a Teflon<sup>®</sup> coated stir bar. The dark orange solution was stirred at 80°C for 2 hours to ensure full conversion of **1** to **2**. The solvent was removed *in vacuo* to afford a brown solid and the product was washed with heptane (3 x 1 mL) (0.0299 g, 81.5% crude yield). An isolated yield could not be obtained due to impurities of **4**.  $^1H$  NMR (THF- $d_8$ , 300.13 MHz):  $\delta$  29.29 ( $w_{1/2}$  = 29 Hz), 26.62 ( $w_{1/2}$  = 29 Hz), 23.45 ( $w_{1/2}$  = 26 Hz), 23.19 ( $w_{1/2}$  = 20 Hz), 21.08 ( $w_{1/2}$  = 25 Hz), 18.75 ( $w_{1/2}$  = 17 Hz), 17.21 ( $w_{1/2}$  = 13 Hz), 14.53 ( $w_{1/2}$  = 19 Hz), 11.26 ( $w_{1/2}$  = 18 Hz), 11.07 ( $w_{1/2}$  = 16 Hz), 9.81 ( $w_{1/2}$  = 18 Hz), 9.46 ( $w_{1/2}$  = 17 Hz), -3.06 ( $w_{1/2}$  = 14 Hz).  $^{31}P\{^1H\}$  NMR (THF- $d_8$ , 121.49 MHz): 104.07 (s, 1P), 71.15 (s, 1P). Anal. Calcd. (%) for  $C_{42}H_{32}Cl_2N_4O_2P_2U$ : C: 50.67; H: 3.24; N: 5.63. Found C: 50.21; H: 3.41; N: 5.71. While this compound could not be separated from small impurities of complex **4**, the obtained elemental analysis data is within acceptable standards, likely due to the similarity of the chemical composition of complexes **4** and **2**.

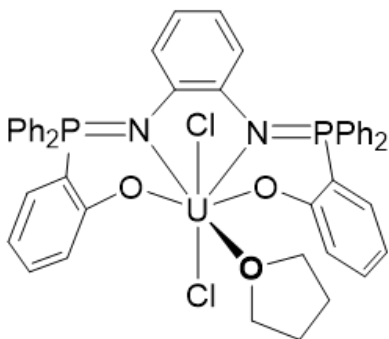

**Complex 3:** In an inert atmosphere glove box, solid  $K_2L$  (0.0200 g, 0.0271 mmol) was added to a 20 mL scintillation vial containing  $UCl_4(dme)_2$  (0.0152 g, 0.0272 mmol) and a Teflon<sup>®</sup> coated stir bar. To this mixture, 6 mL of THF was added and the cloudy green solution was stirred for 4 hours. The solution was then filtered through Celite<sup>®</sup> and the solvent was removed *in vacuo* to afford a pale green solid (0.0164 g yield, 62.4%). Crystals suitable for X-ray diffraction were obtained from a saturated solution of THF at ambient temperature after 12 hours.

$^1H$  NMR (THF- $d_8$ , 300.13 MHz):  $\delta$  32.27 ( $w_{1/2}$  = 121 Hz), 25.86 ( $w_{1/2}$  = 146 Hz), 20.64 ( $w_{1/2}$  = 93 Hz), 17.99 ( $w_{1/2}$  = 113 Hz), 13.48 ( $w_{1/2}$  = 1123 Hz), 10.34 ( $w_{1/2}$  = 255 Hz), 9.59 ( $w_{1/2}$  = 239 Hz), 8.02 ( $w_{1/2}$  = 78 Hz), 7.82 ( $w_{1/2}$  = 31 Hz), 5.37 ( $w_{1/2}$  = 67 Hz), 5.20 ( $w_{1/2}$  = 57 Hz), -1.41 ( $w_{1/2}$  = 165 Hz), -5.84 ( $w_{1/2}$  = 69 Hz)  $^{31}P\{^1H\}$  NMR (THF- $d_8$ , 121.49 MHz):  $\delta$  -56.40 (br s, 2P, P=N). Anal. Calcd. (%)  $C_{84}H_{64}Cl_4N_4O_4P_4U_2$ : C: 53.14; H: 3.88; N: 2.69. Found C: 53.53; H: 3.98; N: 3.19.

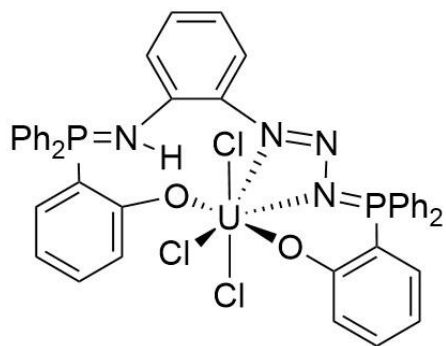

**Complex 4:** In an inert atmosphere glove box, solid  $K_2L''$  (0.0114 g, 0.0144 mmol) was added to a vial containing  $UCl_4$  (0.0053 g, 0.0140 mmol). To this mixture, 6 mL of THF was added and the dark orange solution was agitated until the  $K_2L''$  had been completely consumed, about 2 minutes. The THF solution was heated at 50 °C for 10 minutes. The solvent was removed *in vacuo* and the compound was extracted with 2 mL benzene and filtered through Celite®. Crystals suitable for X-ray diffraction were

obtained from benzene at ambient temperature after 24 hours (Yield 0.0019 g, 12% yield).  $^1H$  NMR (THF- $d_8$ , 300.13 MHz):  $\delta$  61.57 ( $w_{1/2}$  = 26 Hz), 50.28 ( $w_{1/2}$  = 98 Hz), 38.75 ( $w_{1/2}$  = 48 Hz), 34.15 ( $w_{1/2}$  = 30 Hz), 33.62 ( $w_{1/2}$  = 18 Hz), 28.65 ( $w_{1/2}$  = 29 Hz), 26.67 ( $w_{1/2}$  = 16 Hz), 25.71 ( $w_{1/2}$  = 21 Hz), 25.14 ( $w_{1/2}$  = 21 Hz), 15.35 ( $w_{1/2}$  = 15 Hz), 8.60 ( $w_{1/2}$  = 19 Hz), 7.68 ( $w_{1/2}$  = 18 Hz), 6.37 ( $w_{1/2}$  = 16 Hz), 6.17 ( $w_{1/2}$  = 26 Hz), 5.41 ( $w_{1/2}$  = 17 Hz), -1.72 ( $w_{1/2}$  = 16 Hz), -21.33 ( $w_{1/2}$  = 13 Hz).  $^{31}P\{^1H\}$  NMR (THF- $d_8$ , 121.49 MHz): 88.93 (d,  $^3J_{PH}$  = 13.4 Hz, 1P, doublet is due to incomplete  $^1H$  decoupling), -38.16 (s, 1P). This product is a minor impurity and has eluded preparation on a large scale. As a consequence, only small quantities of non-analytically pure material were available for combustion analysis, and repeated attempts failed to provide acceptable data.

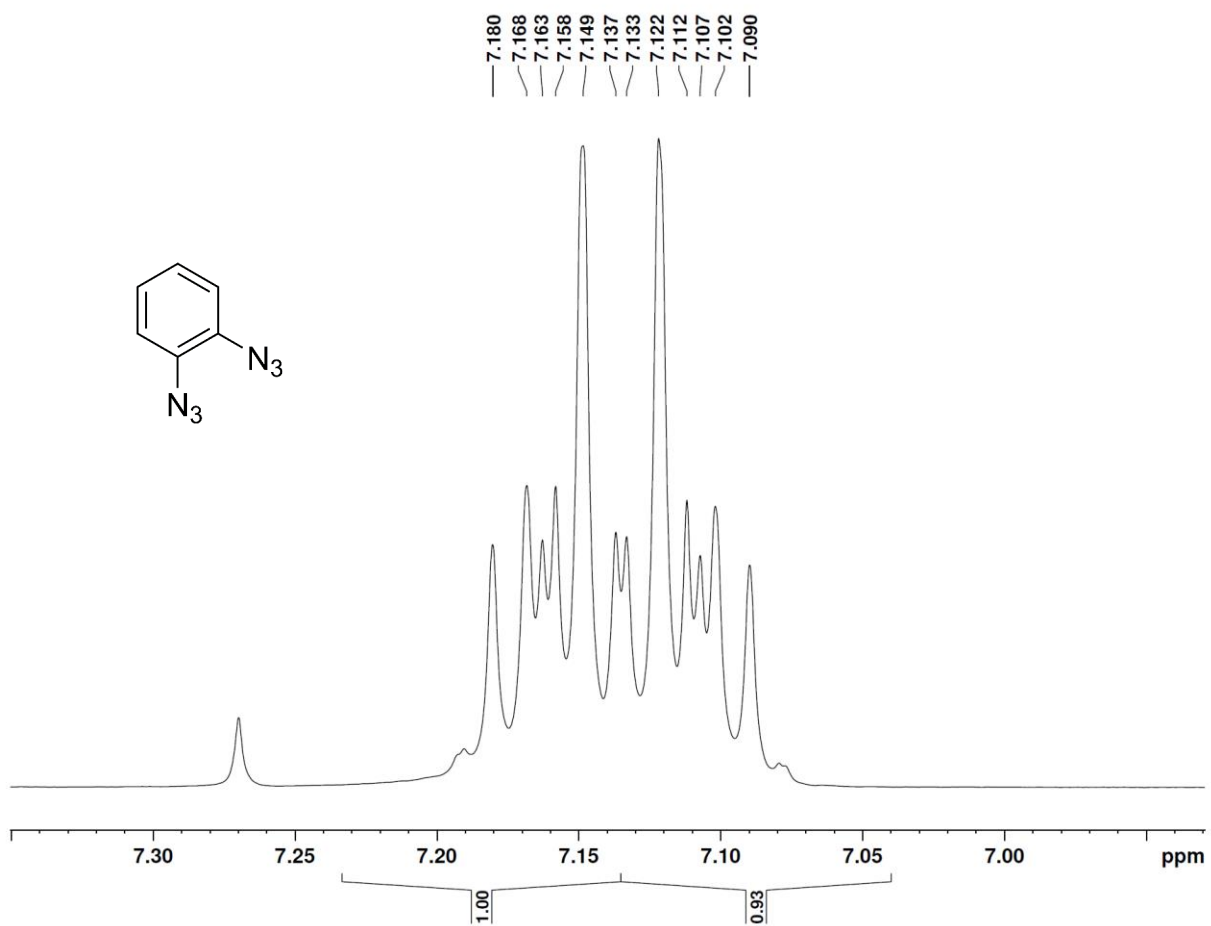

**Figure S1.**  $^1\text{H}$  NMR spectrum of 1,2-diazidobenzene in  $\text{CDCl}_3$ .

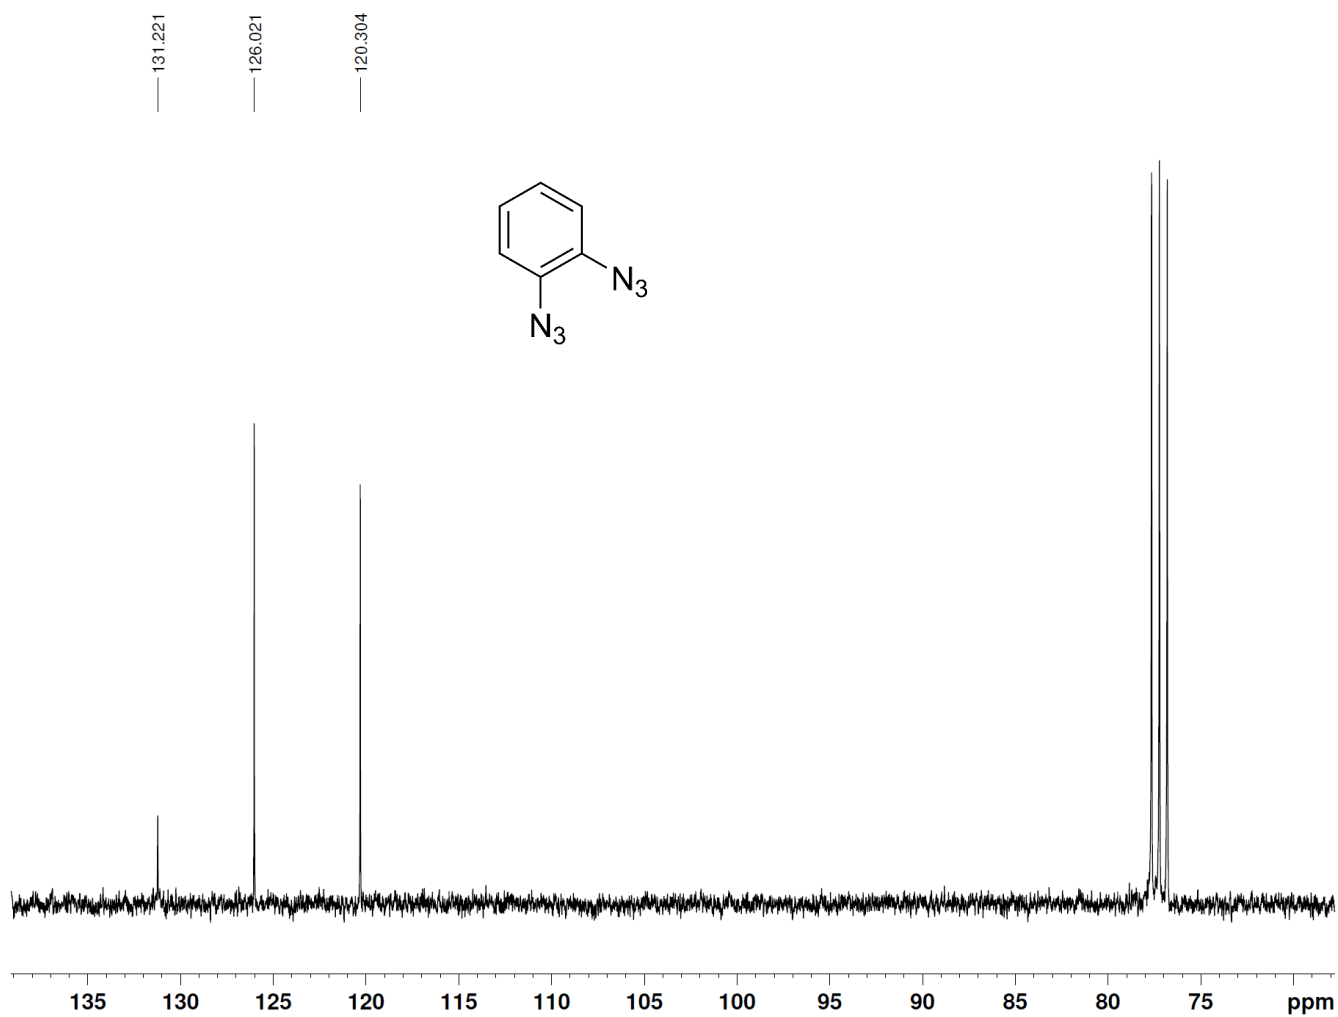

**Figure S2.**  $^{13}\text{C}\{^1\text{H}\}$  NMR spectrum of 1,2-diazidobenzene in  $\text{CDCl}_3$ .

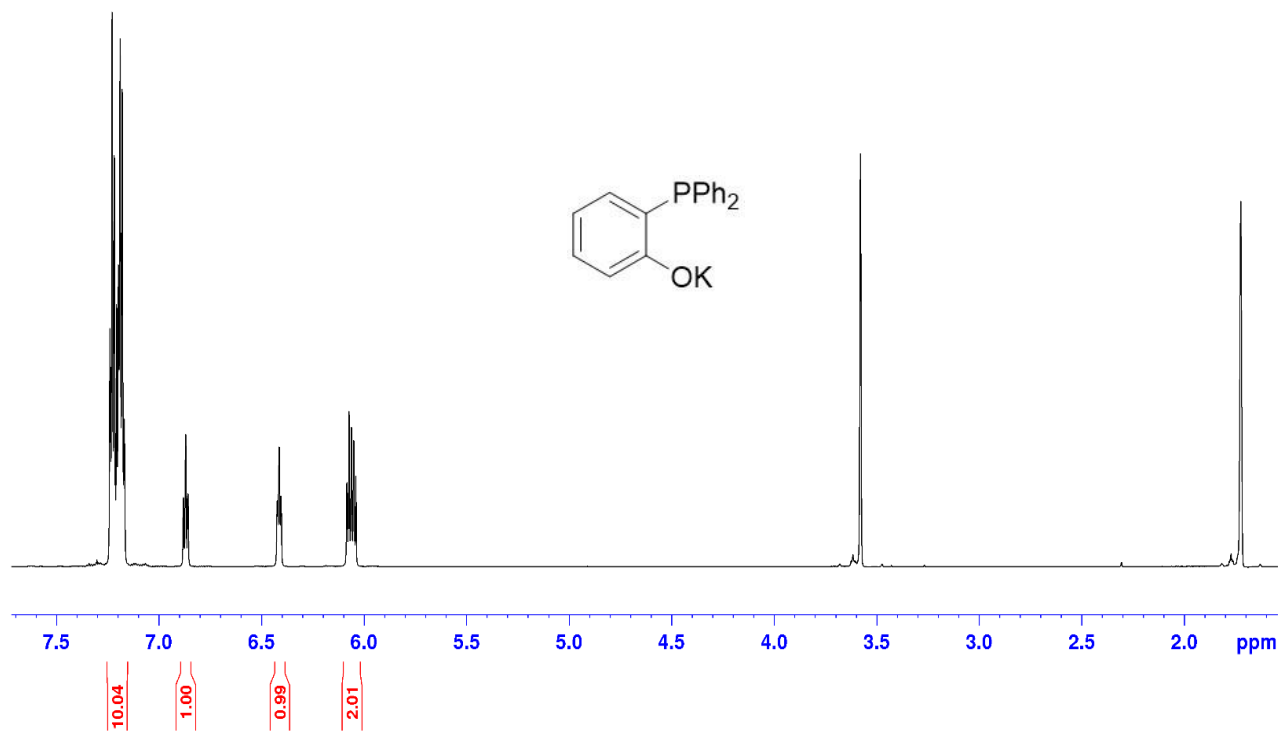

**Figure S3.**  $^1\text{H}$  NMR spectrum of (2-OK-C<sub>6</sub>H<sub>4</sub>)PPh<sub>2</sub> in THF-*d*<sub>8</sub>



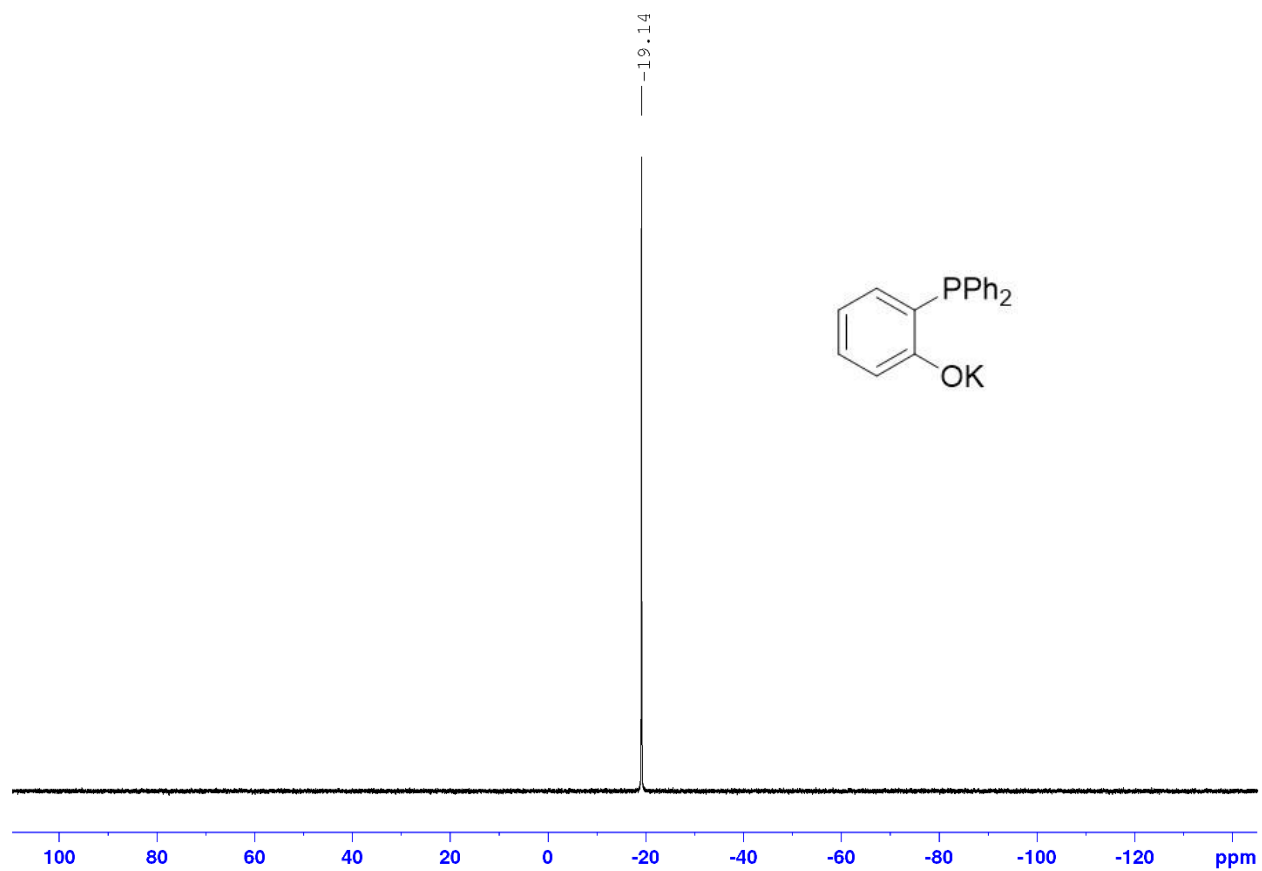

**Figure S4.**  $^{31}\text{P}$  NMR spectrum of  $(2\text{-OK-C}_6\text{H}_4)\text{PPh}_2$  in  $\text{THF-}d_8$

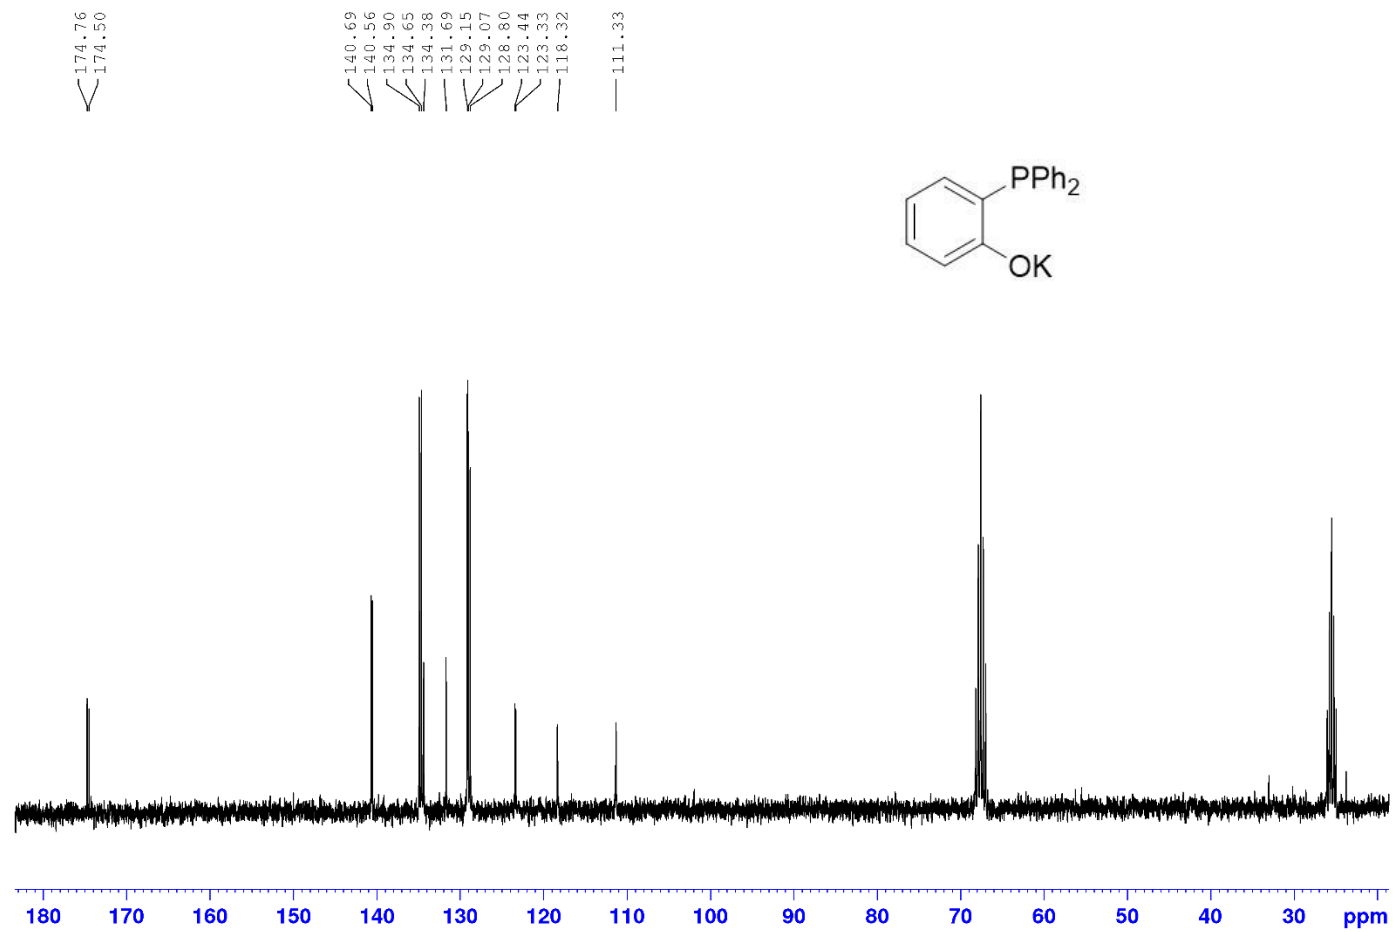

**Figure S5.**  $^{13}\text{C}\{^1\text{H}\}$  NMR spectrum of (2-OK-C<sub>6</sub>H<sub>4</sub>)PPh<sub>2</sub> in THF-*d*<sub>8</sub>

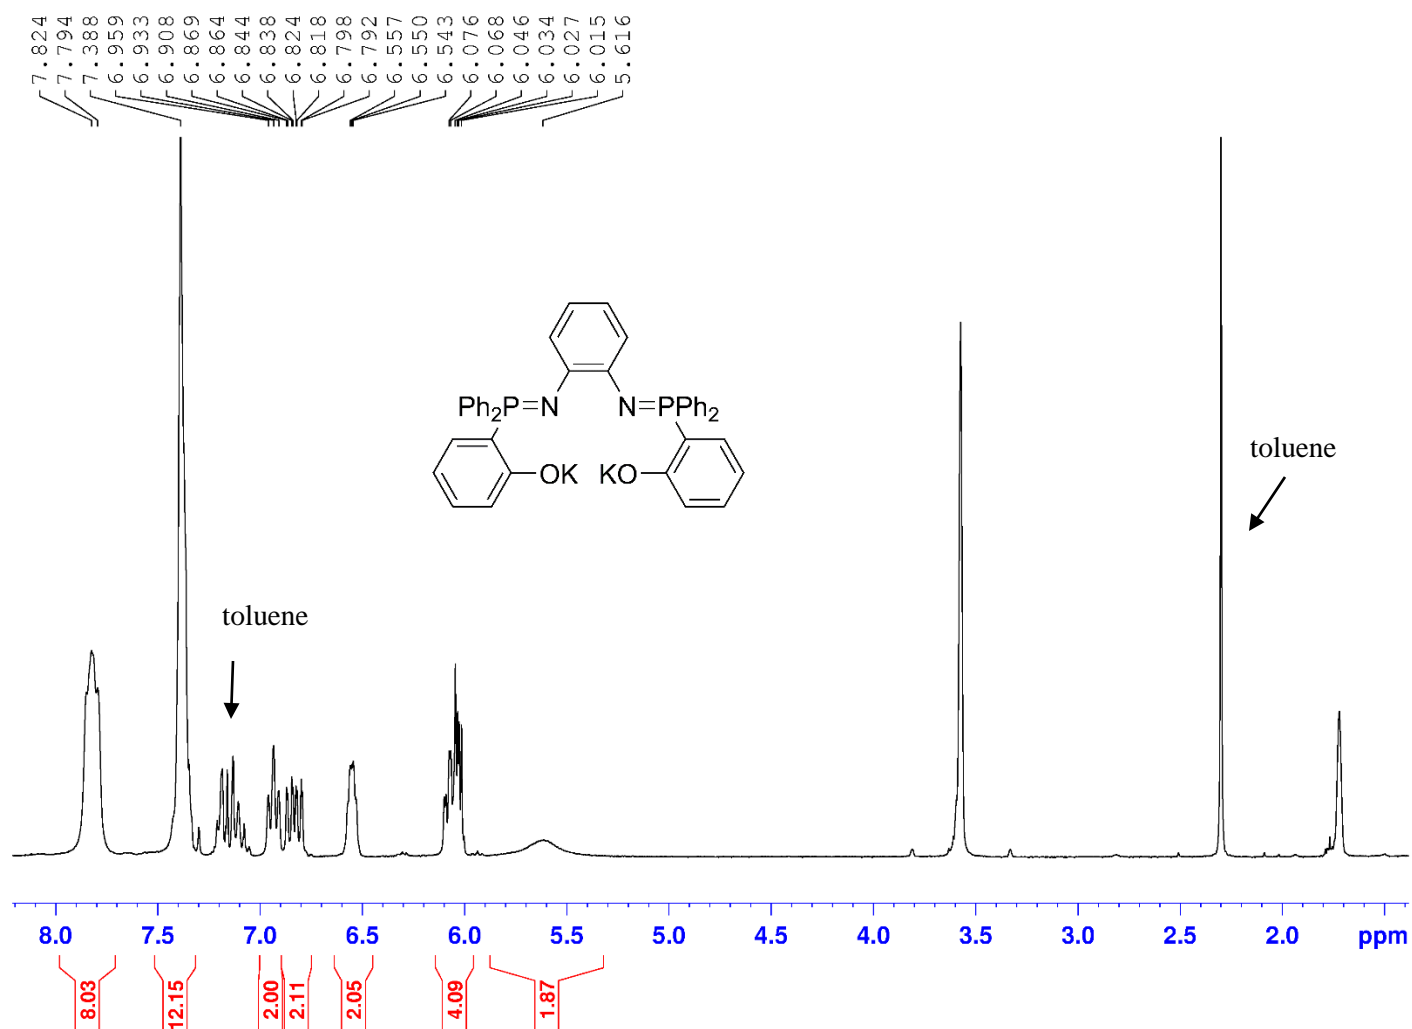

**Figure S6.**  $^1H$  NMR spectrum of  $K_2L$  in  $THF-d_8$ .

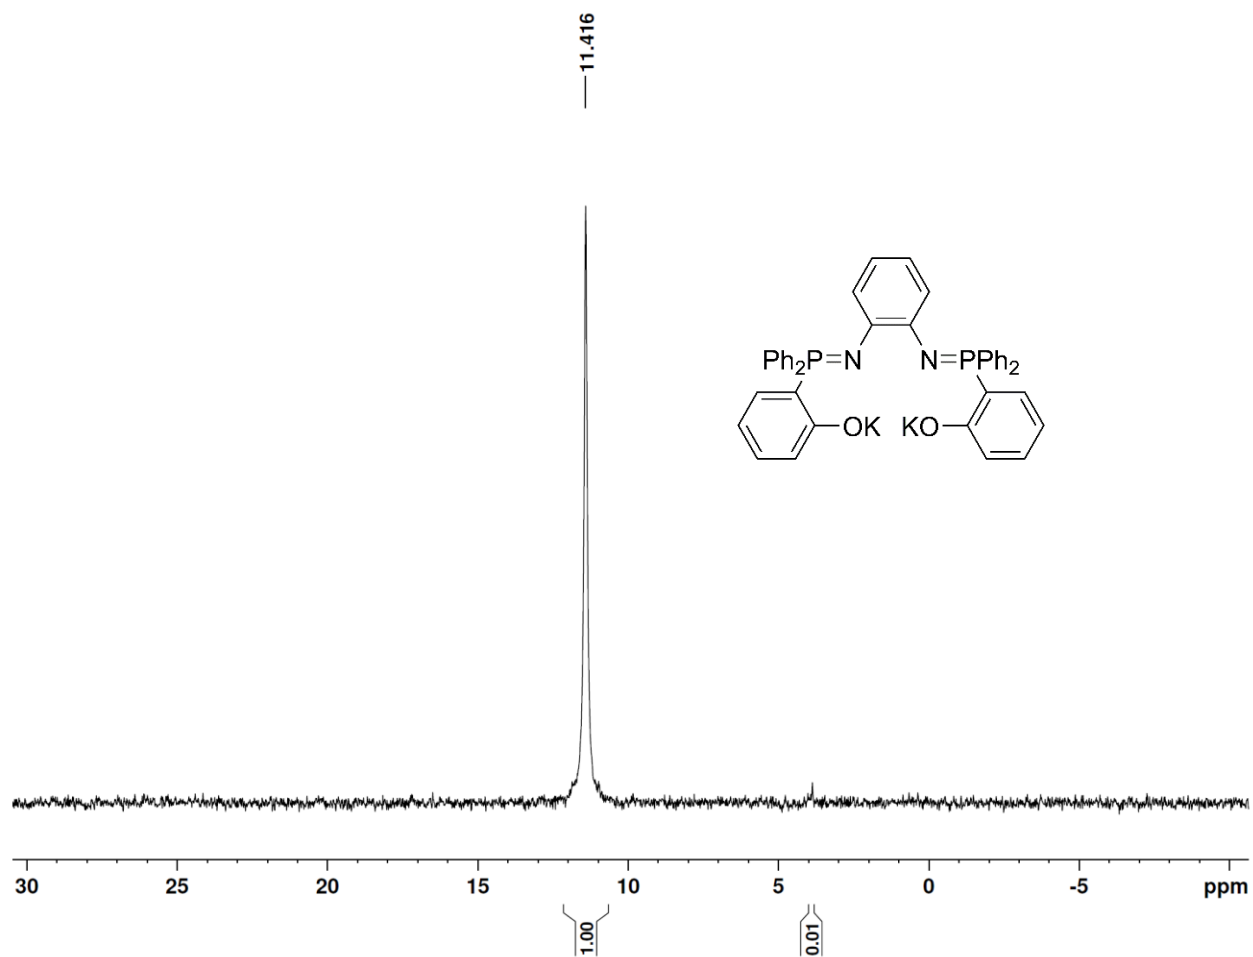

**Figure S7.**  $^{31}\text{P}$  NMR spectrum of **K<sub>2</sub>L** in THF-*d*<sub>8</sub>.

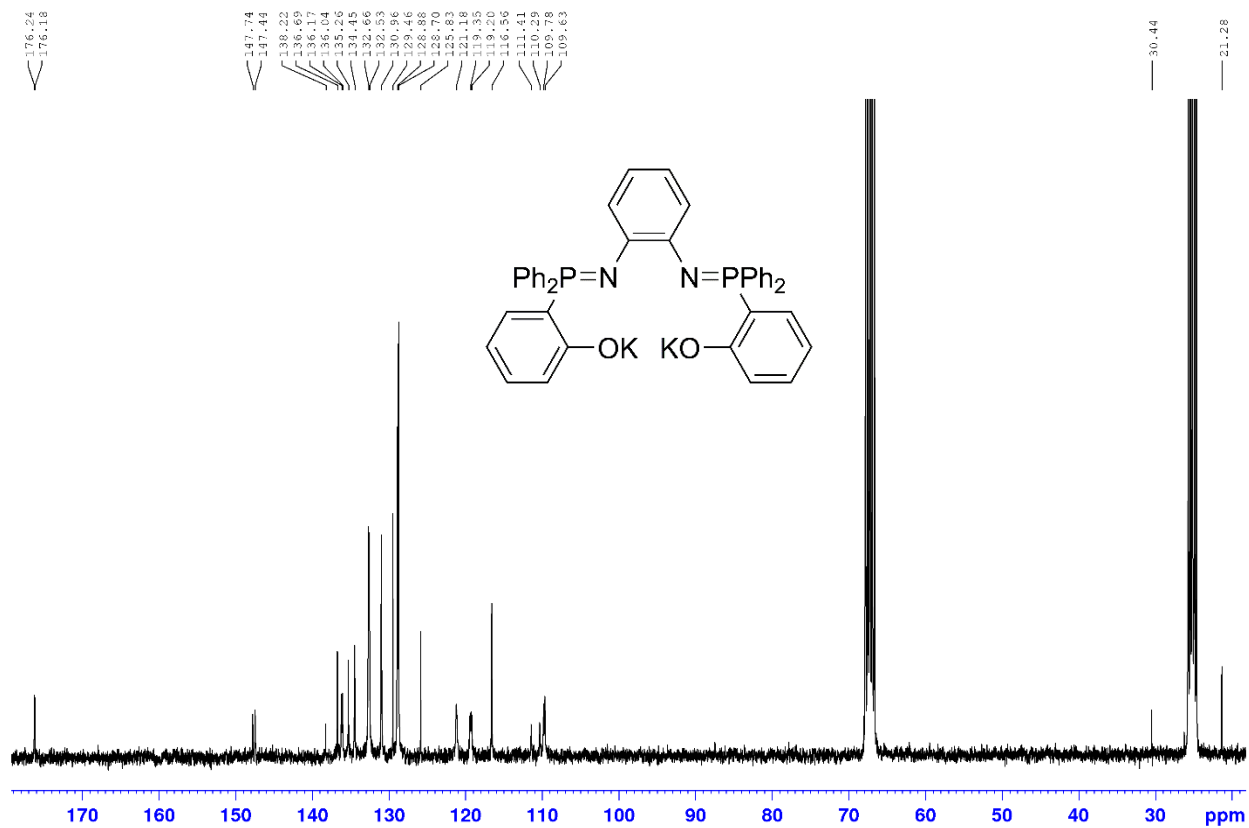

**Figure S8.**  $^{13}\text{C}\{^1\text{H}\}$  NMR spectrum of **K<sub>2</sub>L** in  $\text{THF-}d_8$ .

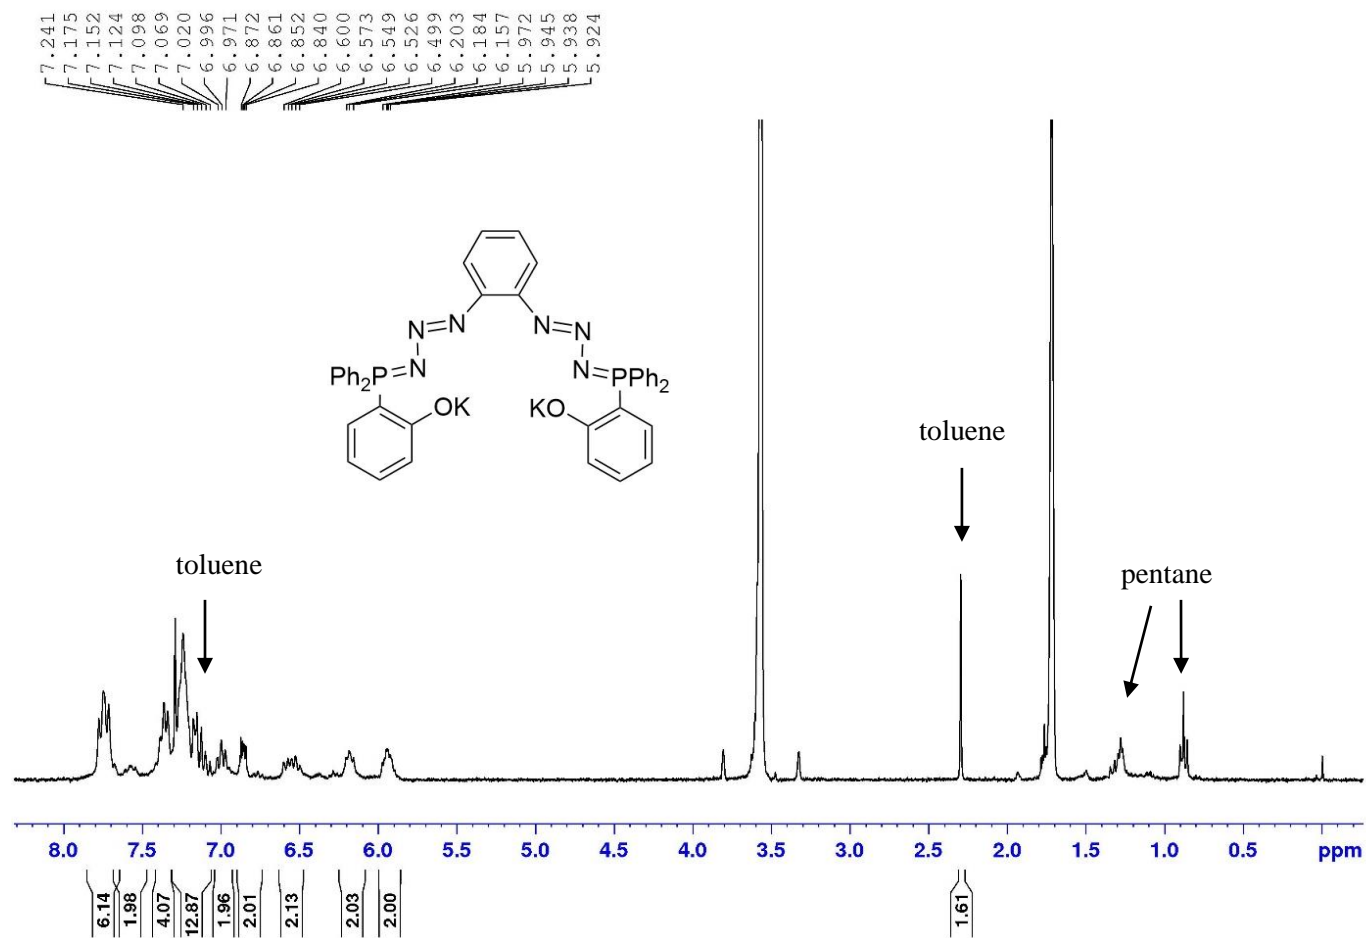

**Figure S9.**  $^1\text{H}$  NMR spectrum of  $\text{K}_2\text{L}''$  in  $\text{THF}-d_8$ .

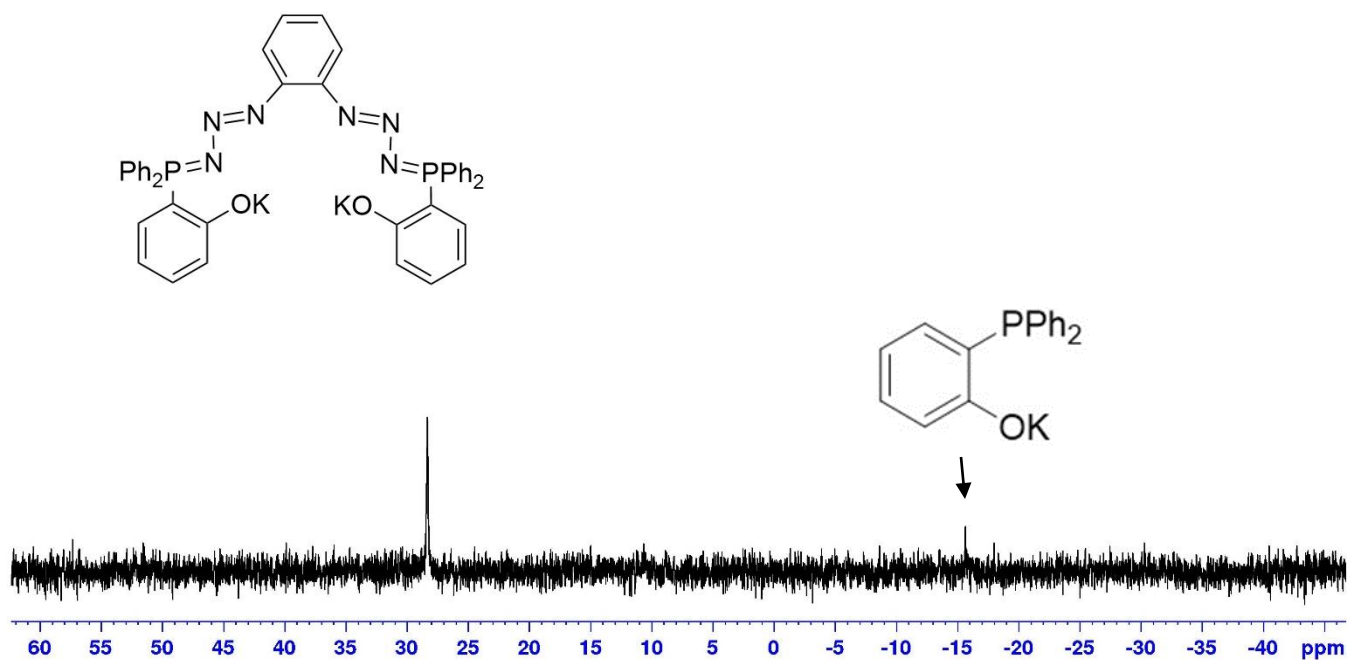

**Figure S10.**  $^{31}\text{P}\{^1\text{H}\}$  NMR spectrum of  $\text{K}_2\text{L}'$  with small impurity of  $(2\text{-OK-C}_6\text{H}_4)\text{PPh}_2$  in  $\text{THF-}d_8$ .

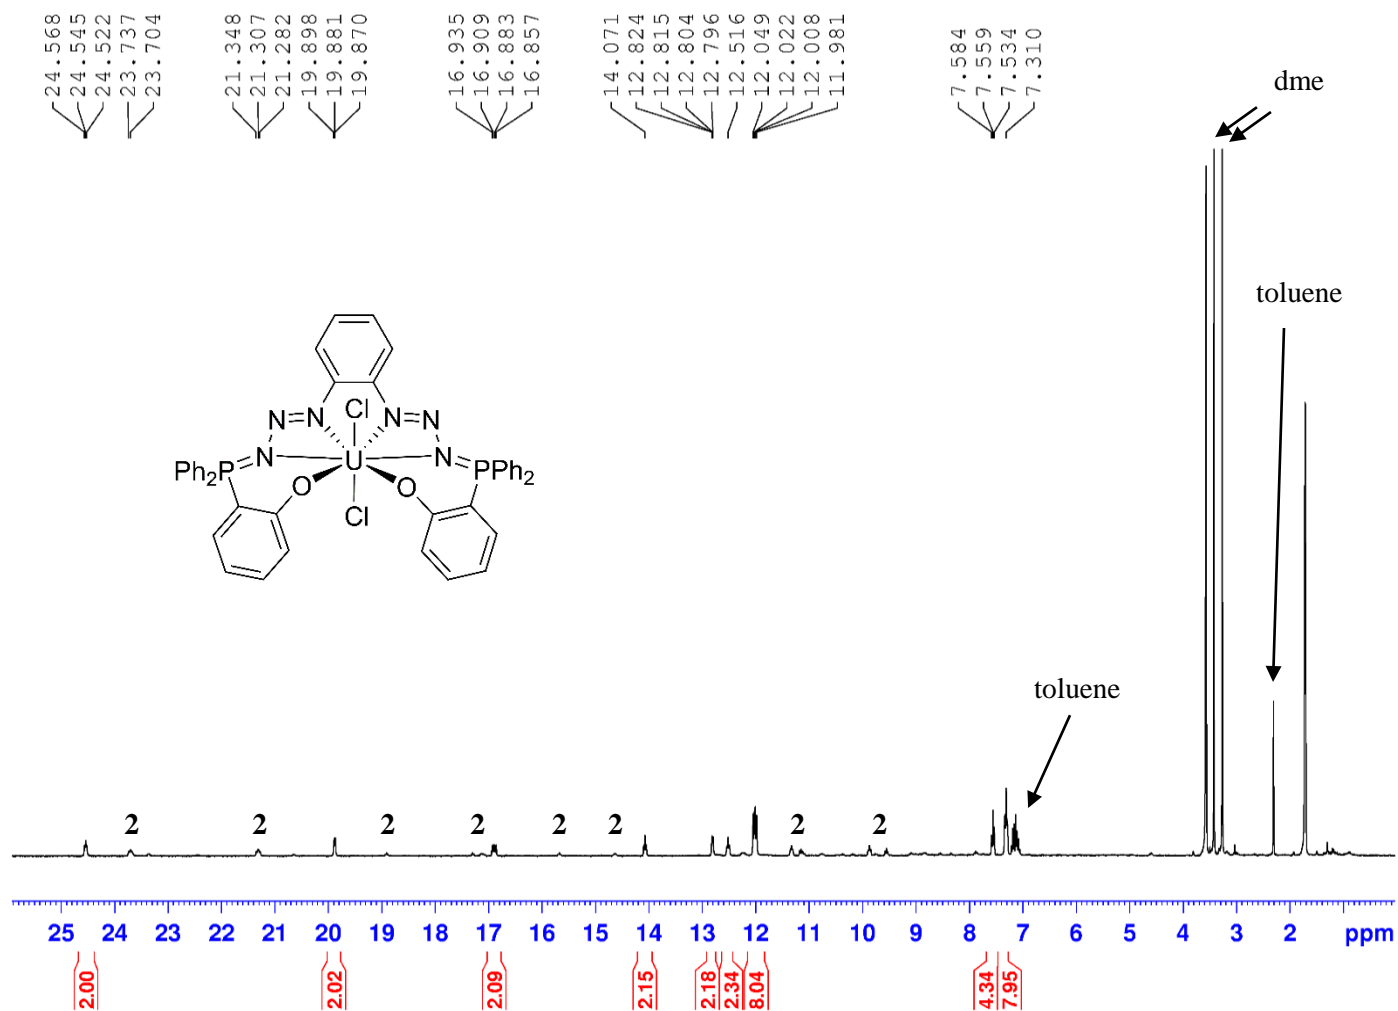

**Figure S11.** <sup>1</sup>H NMR spectrum of complex 1 in THF-*d*<sub>8</sub> with toluene and complex 2 impurity.



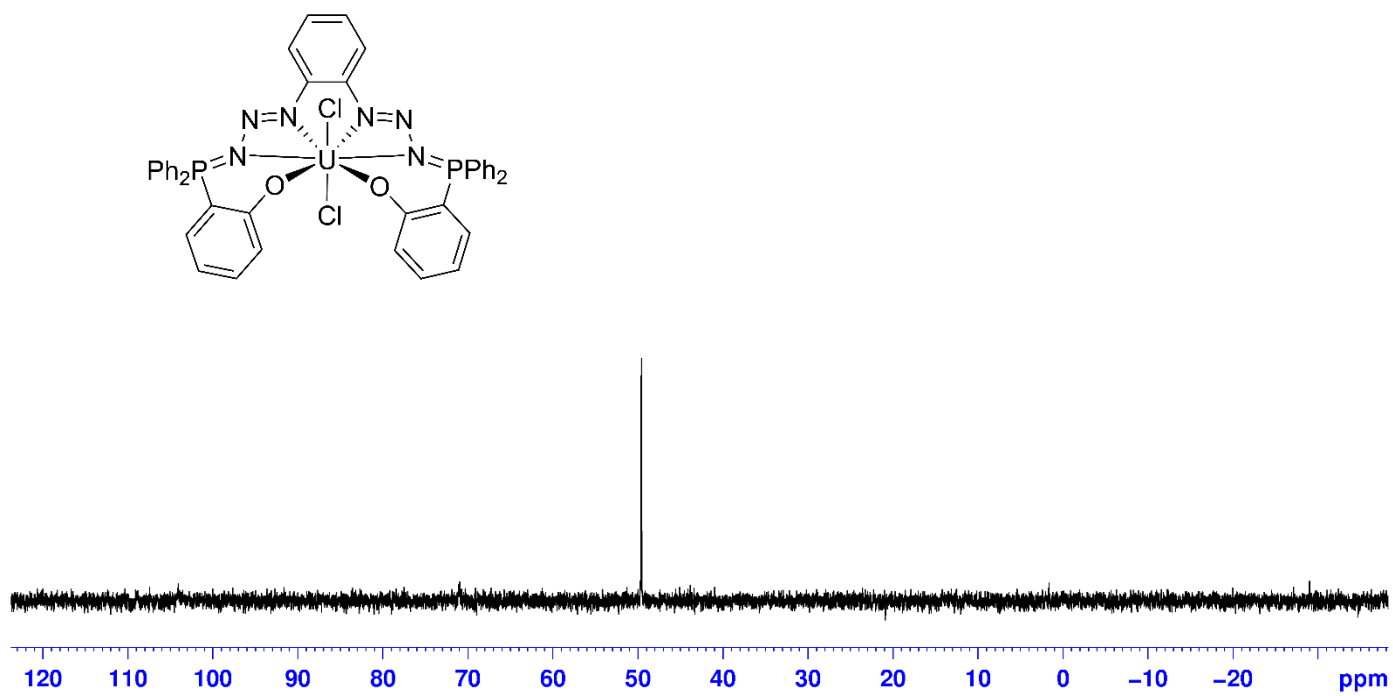

**Figure S12.**  $^{31}\text{P}\{^1\text{H}\}$  NMR spectrum of complex **1** in THF-*d*<sub>8</sub>.

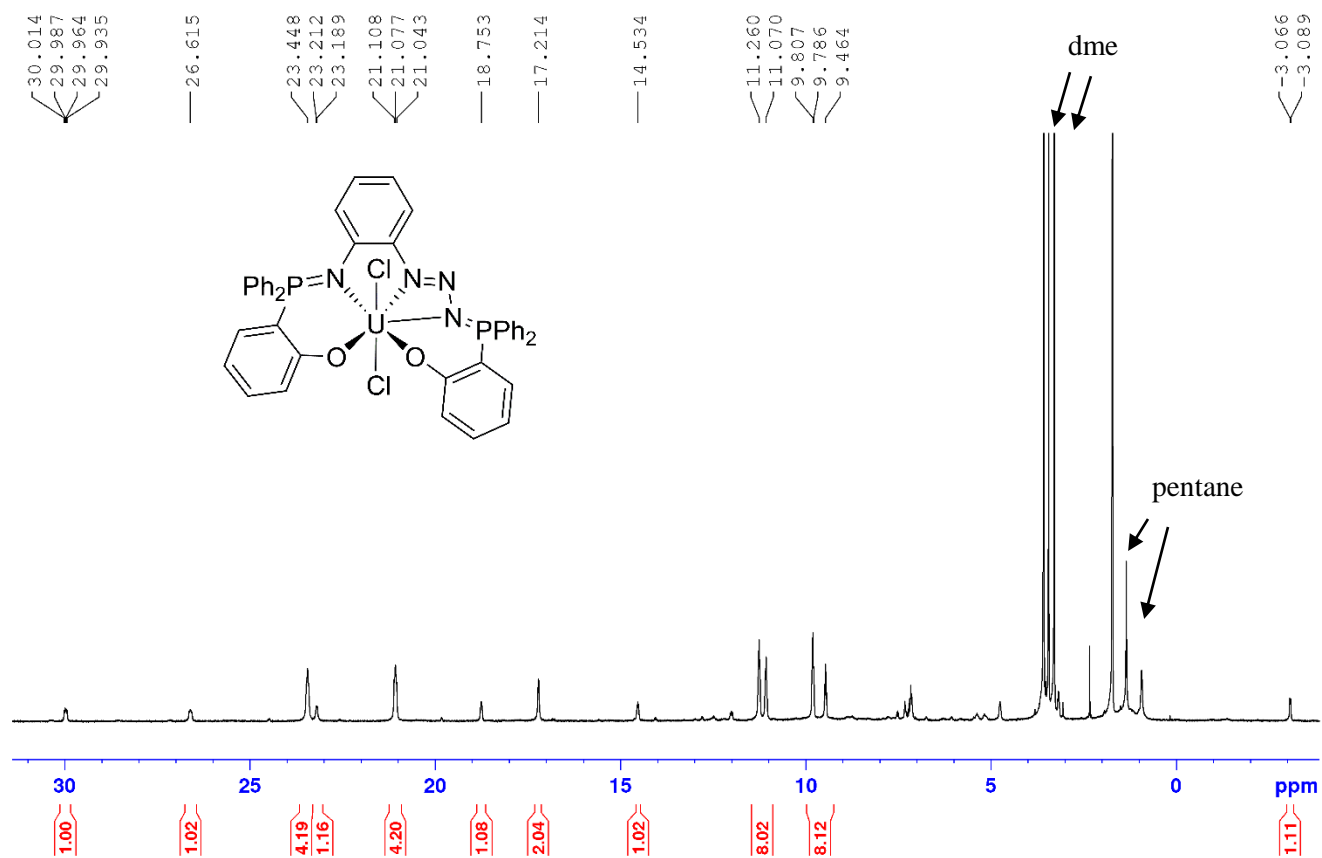

**Figure S13.** <sup>1</sup>H NMR spectrum of complex 2 in THF-*d*<sub>8</sub>.

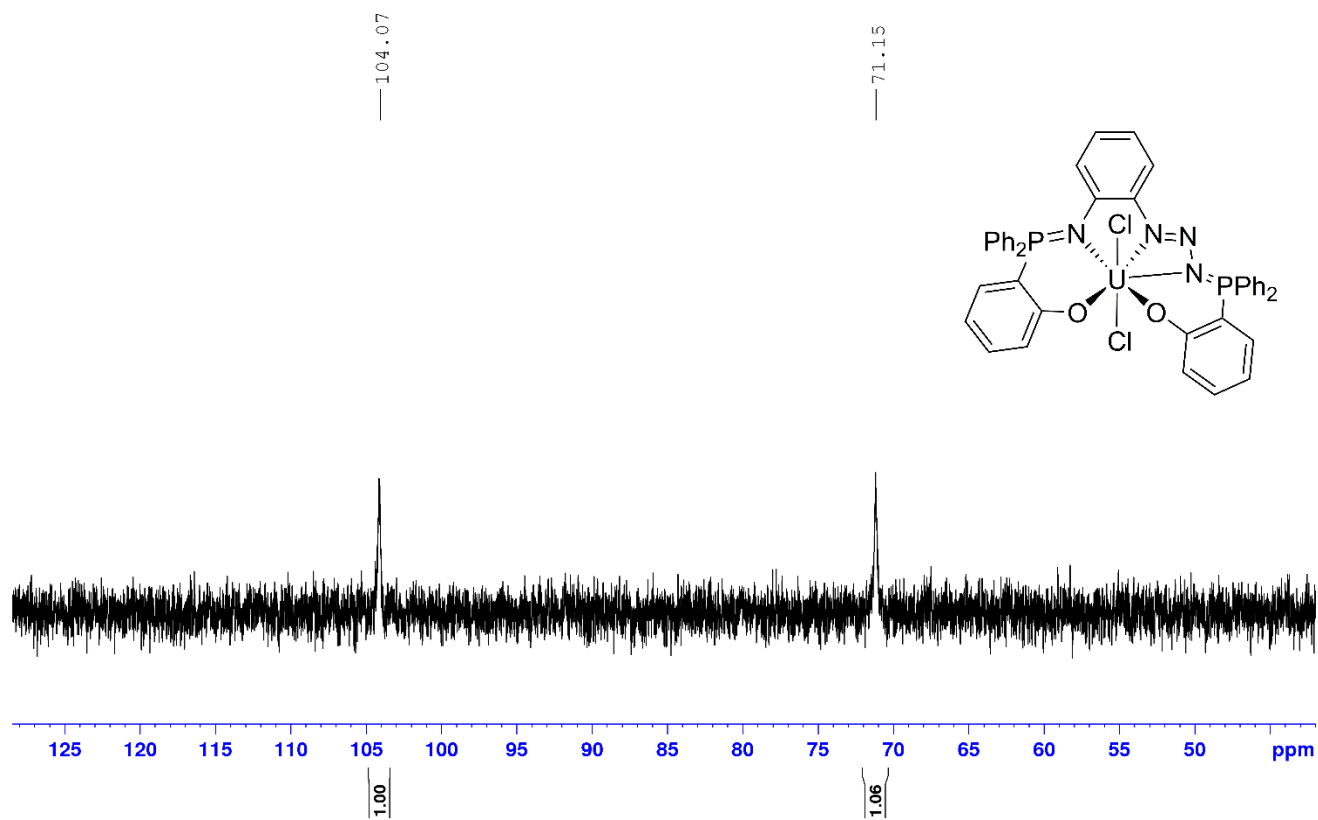

**Figure S14.**  $^{31}\text{P}\{^1\text{H}\}$  NMR spectrum of complex **2** in  $\text{THF-}d_8$ .

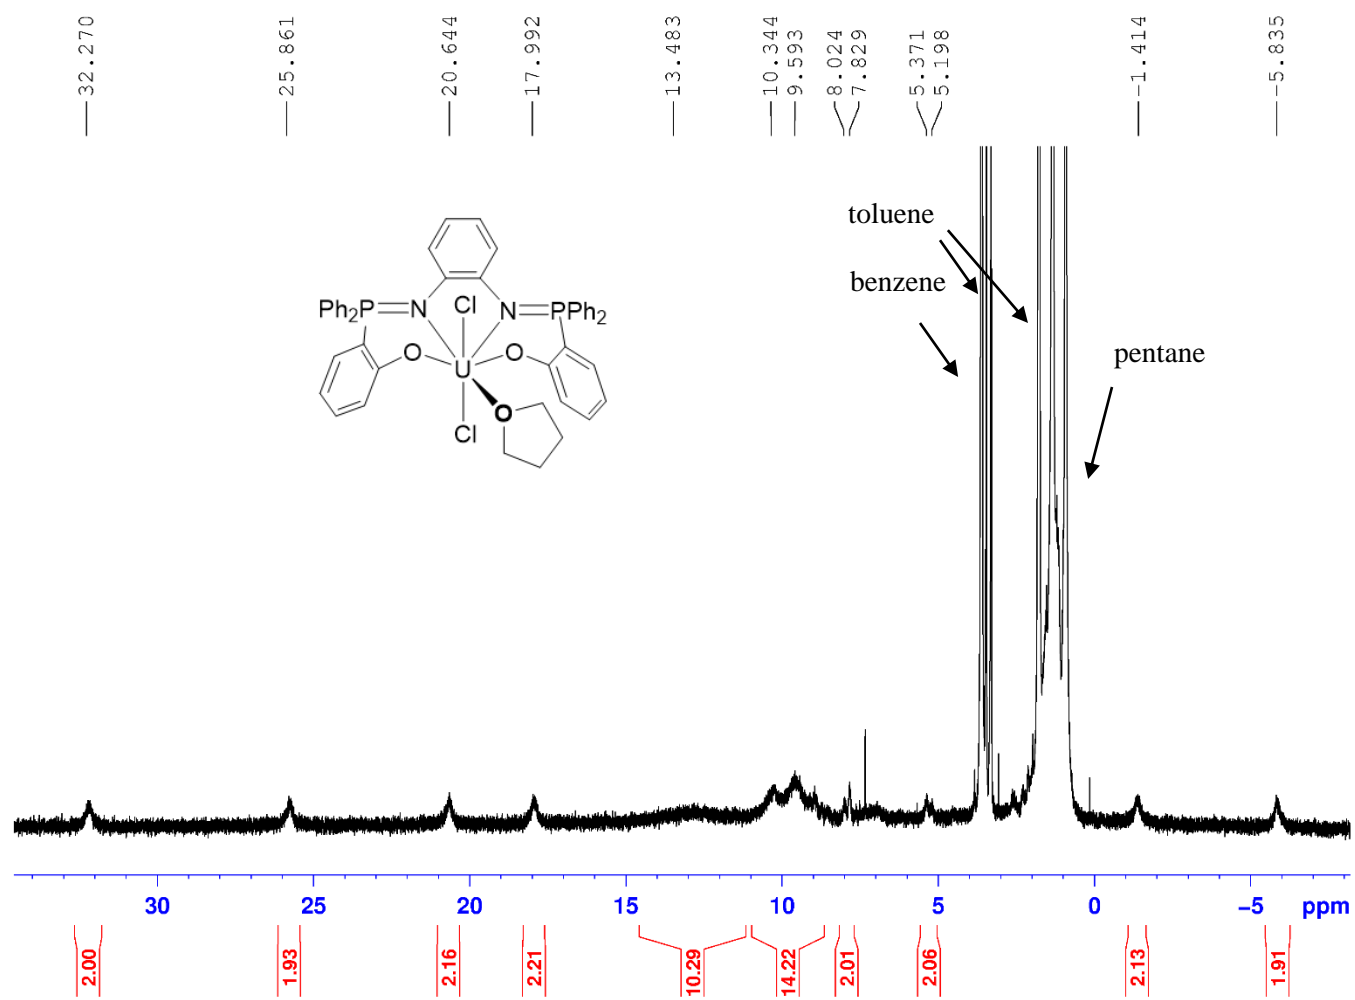

Figure S15. <sup>1</sup>H NMR spectrum of complex 3 in THF-*d*<sub>8</sub>.

— -56.40

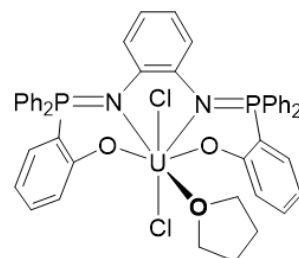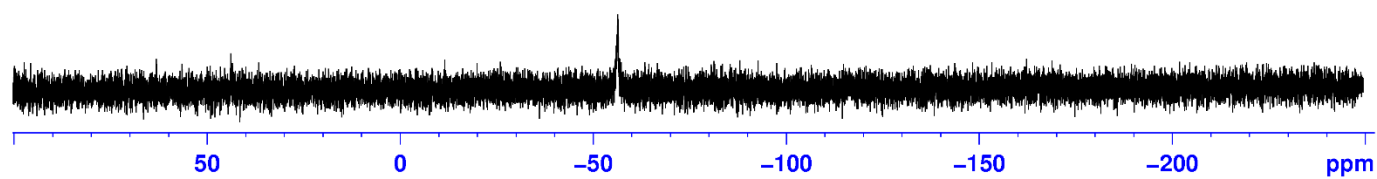

**Figure S16.**  $^{31}\text{P}\{^1\text{H}\}$  NMR spectrum of complex **3** in THF- $d_8$ .

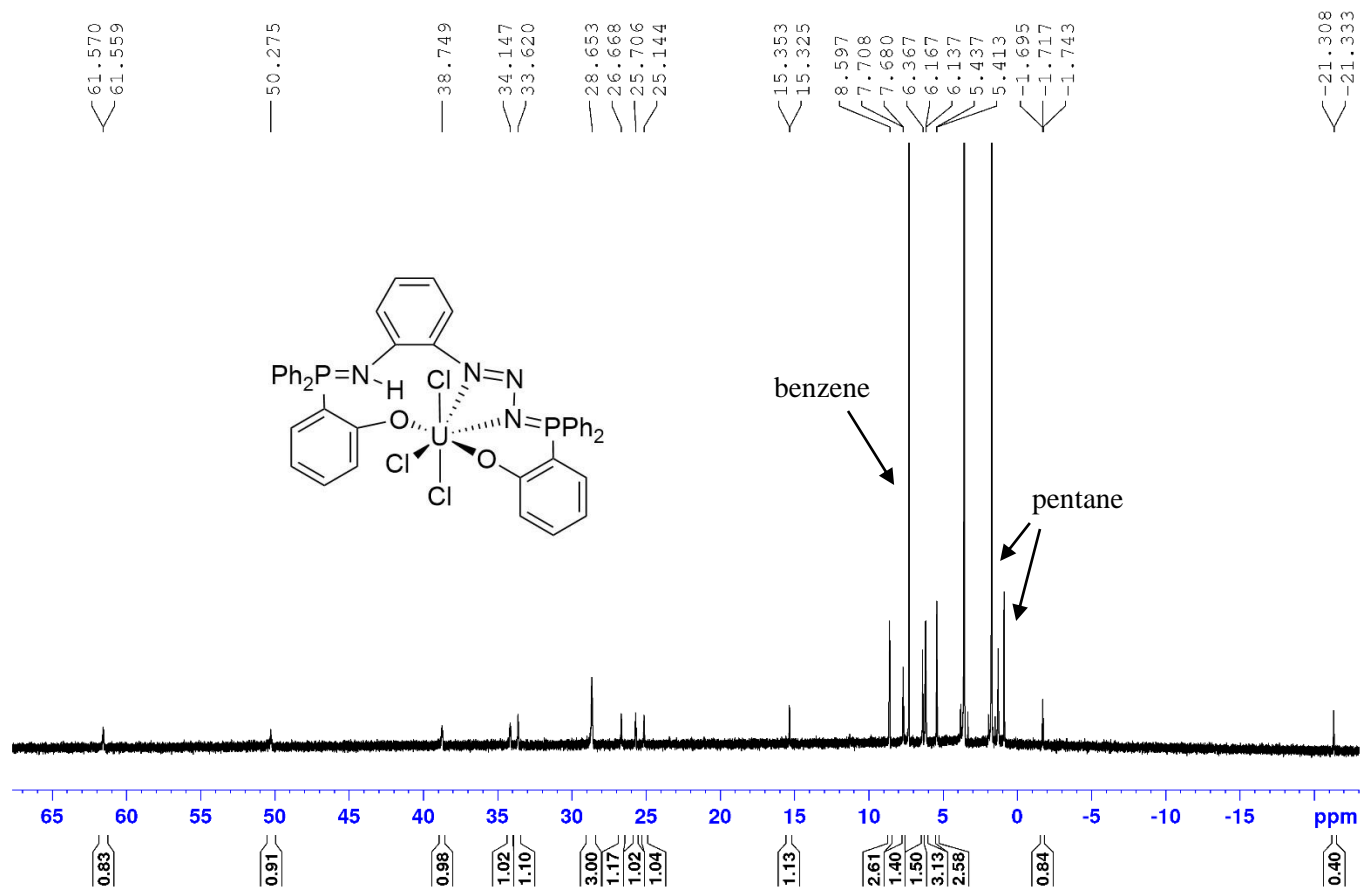

**Figure S17.**  $^1\text{H}$  NMR spectrum of complex 4 in  $\text{THF-}d_8$ .

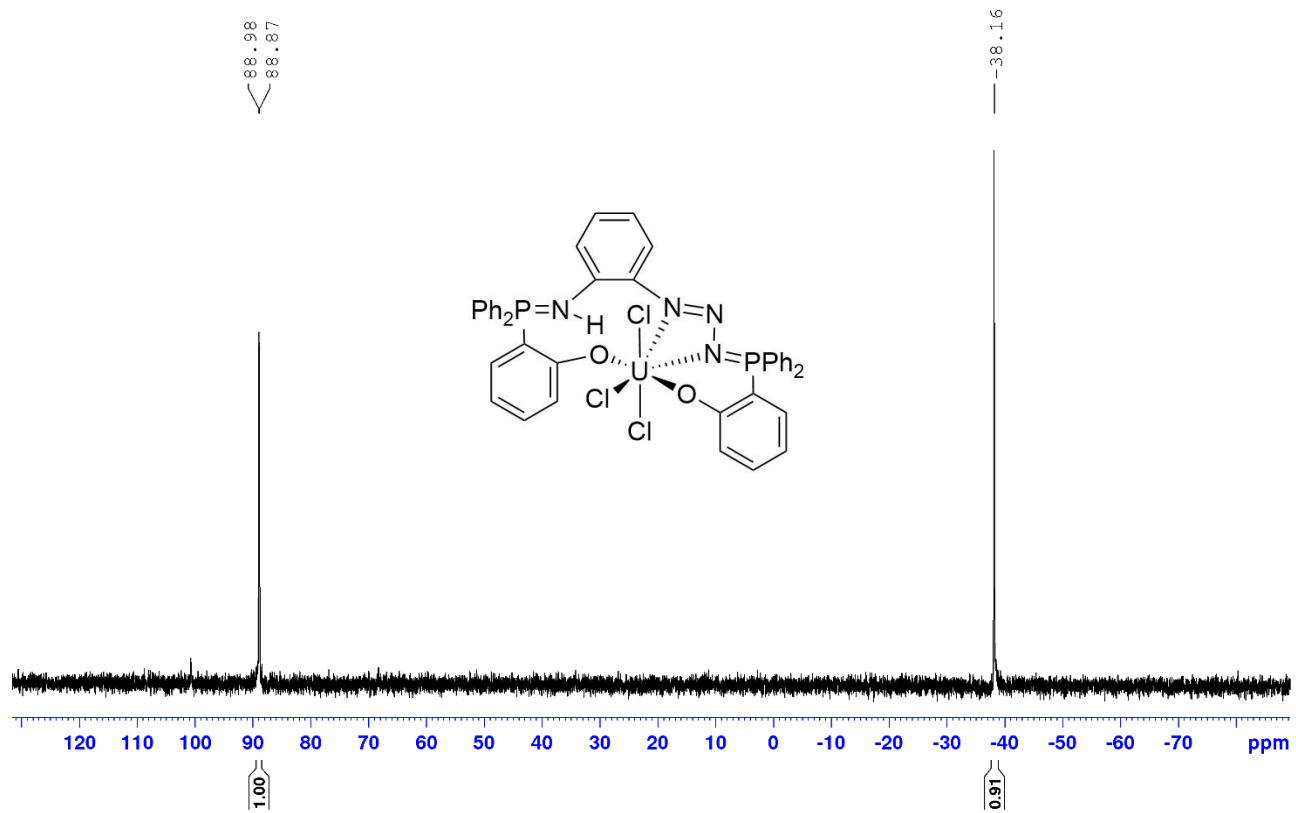

**Figure S18.**  $^{31}\text{P}\{^1\text{H}\}$  NMR spectrum of complex **4** in  $\text{THF-}d_8$ .

## Crystallographic details

Unfortunately, single crystals of **3** grown in THF and [KL][K(18-crown-6)] in toluene succumb to rapid decomposition upon removal from the mother liquor, resulting in the crystals becoming covered with amorphous material. However, inner portions of the crystals remain intact, allowing for modest diffraction of X-ray radiation, despite interference from the polycrystalline material. The data is not ideal, however, and therefore discussions of the metrical parameters are not included in the body of the manuscript. The data set does, however, allow for qualitative discussions associated with the connectivity of atoms, and thus, the geometry of complex **3** and [KL][K(18-crown-6)]. The structure of **3** is depicted in Fig. S19. The structure of [KL][K(18-crown-6)] is depicted in Fig. S20.

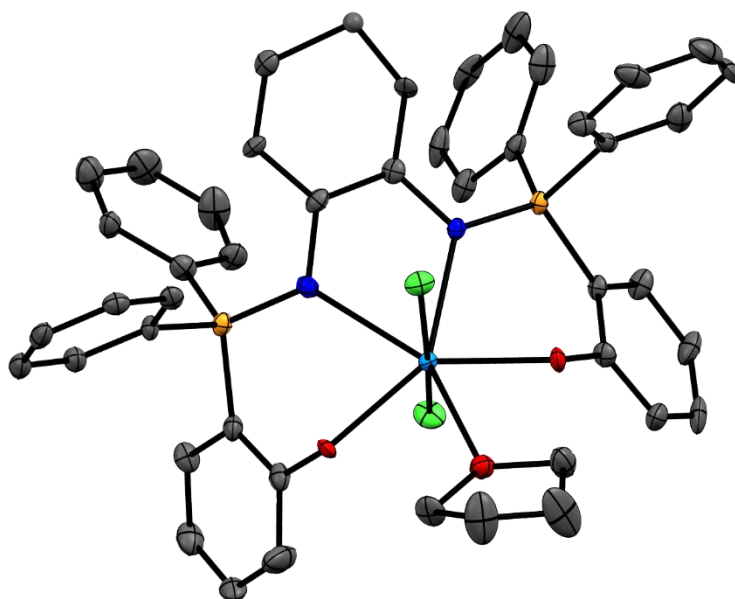

**Figure S19.** Connectivity structure of **3**.



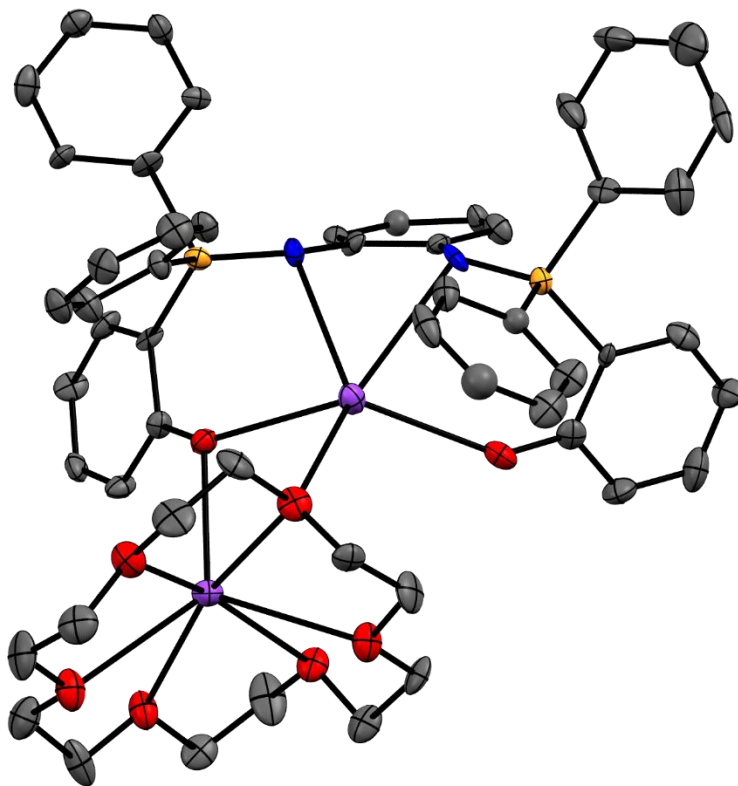

**Figure S20.** Connectivity structure of the product of  $K_2L''$  with one equivalent of 18-crown-6 grown from toluene,  $[KL][K(18\text{-crown-6})]$ .

Single crystals of 2-azidoaniline were grown from petroleum ether by evaporation. Single crystals of 1,2-diazidobenzene were grown in a  $-35^\circ\text{C}$  freezer from petroleum ether and were kept cold while mounting using a steel trough with a cold nitrogen stream. Compounds **1**, **2**, and **4** were grown from benzene and were coated in a dry Paratone® oil under an inert argon atmosphere. Crystals were mounted using MiTeGen Microloops™. Crystal data was collected on a Rigaku SuperNova, Dual, Cu at zero, Pilatus 200K diffractometer. Samples were cooled to 100 K using an Oxford Cryostream device. Data reduction was accomplished by the CrysAlis<sup>Pro</sup> (version 1.171.38.43) software package. Absorption corrections were applied by multi-scan techniques and empirical absorption correction using spherical harmonics, implemented in SCALE3 ABSPACK scaling algorithm. Structures were solved in the Olex2<sup>5</sup> environment using intrinsic phasing and refined by full-matrix least squares method on  $F^2$  using the SHELX software suite.<sup>6-7</sup> All non-hydrogen (except N–H) atoms were refined anisotropically, C–H hydrogens were calculated and refined isotropically as a riding model. N–H hydrogens were located by the Fourier difference maps and refined isotropically. Summary of the crystallographic data can be found below in **Table S1**.

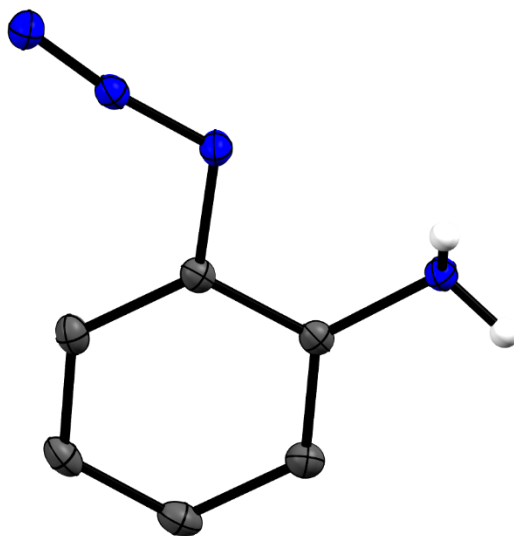

**Figure S21.** X-ray crystal structure of 2-azidoaniline with thermal ellipsoids drawn at 30% probability

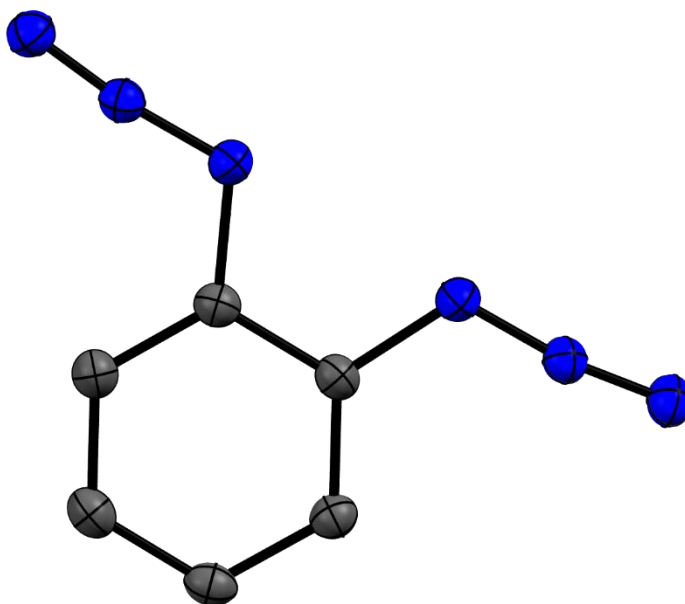

**Figure S22.** X-ray crystal structure of 1,2-diazidoenzyme with thermal ellipsoids drawn at 30% probability

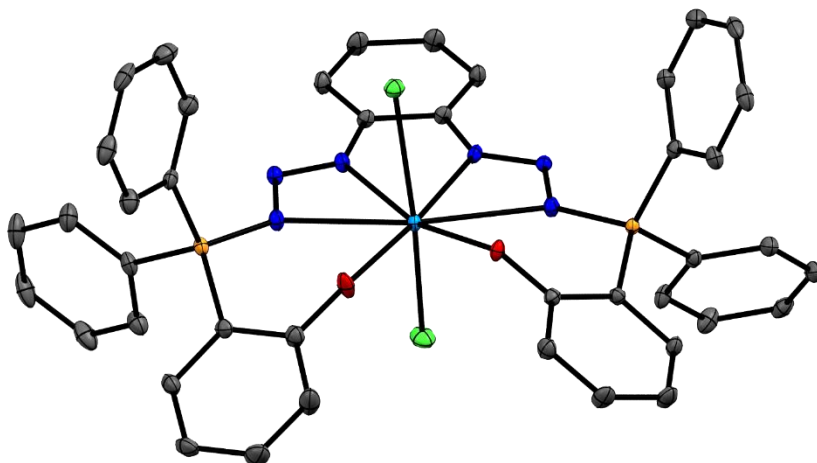

**Figure S23.** X-ray crystal structure of **1** with thermal ellipsoids drawn at 30% probability.

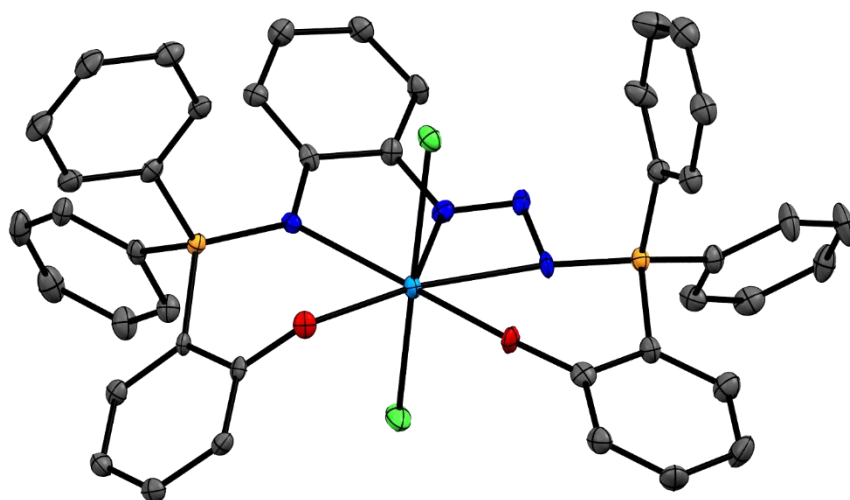

**Figure S24.** X-ray crystal structure of **2** with thermal ellipsoids drawn at 30% probability.

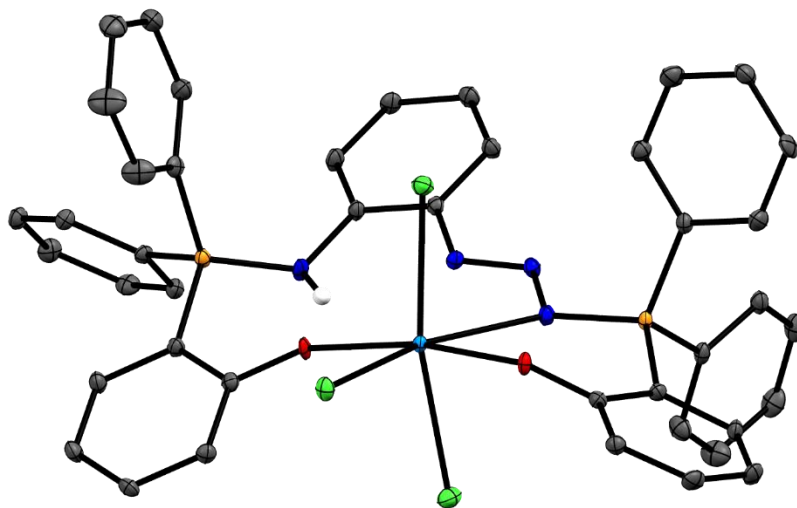

**Figure S25.** X-ray crystal structure of **4** with thermal ellipsoids drawn at 30% probability.

**Table S1.** Crystallographic data and structure refinement for 2-azidoaniline, 1,2-diazidobenzene and complexes **1**, **2**, **3** and **4**.

|                                                    | 2-azidoaniline                                                   | 1,2-diazidobenzene                                               | 1 · (C <sub>6</sub> H <sub>6</sub> )                                                           | 2                                                                                              | 3                                                                                              | 4 · 2(C <sub>6</sub> H <sub>6</sub> )                                                          | [KL][K(18-crown-6)]                                                                         |
|----------------------------------------------------|------------------------------------------------------------------|------------------------------------------------------------------|------------------------------------------------------------------------------------------------|------------------------------------------------------------------------------------------------|------------------------------------------------------------------------------------------------|------------------------------------------------------------------------------------------------|---------------------------------------------------------------------------------------------|
| CCDC #                                             | 1533033                                                          | 1533034                                                          | 1533036                                                                                        | 1942135                                                                                        | N/A                                                                                            | 1533037                                                                                        | N/A                                                                                         |
| Empirical formula                                  | C <sub>6</sub> H <sub>6</sub> N <sub>4</sub>                     | C <sub>6</sub> H <sub>4</sub> N <sub>6</sub>                     | C <sub>48</sub> H <sub>38</sub> Cl <sub>2</sub> N <sub>6</sub> O <sub>2</sub> P <sub>2</sub> U | C <sub>42</sub> H <sub>32</sub> Cl <sub>2</sub> N <sub>4</sub> O <sub>2</sub> P <sub>2</sub> U | C <sub>46</sub> H <sub>40</sub> Cl <sub>2</sub> N <sub>2</sub> O <sub>3</sub> P <sub>2</sub> U | C <sub>54</sub> H <sub>45</sub> Cl <sub>3</sub> N <sub>4</sub> O <sub>2</sub> P <sub>2</sub> U | C <sub>58</sub> H <sub>58</sub> K <sub>2</sub> N <sub>2</sub> O <sub>9</sub> P <sub>2</sub> |
| Formula weight/g mol <sup>-1</sup>                 | 134.15                                                           | 160.15                                                           | 1101.71                                                                                        | 995.58                                                                                         | 1039.67                                                                                        | 1188.26                                                                                        | 1069.22                                                                                     |
| Temperature/K                                      | 100                                                              | 100                                                              | 100                                                                                            | 100                                                                                            | 112.1(7)                                                                                       | 100                                                                                            | 217(100)                                                                                    |
| Crystal system                                     | orthorhombic                                                     | monoclinic                                                       | triclinic                                                                                      | orthorhombic                                                                                   | triclinic                                                                                      | monoclinic                                                                                     | orthorhombic                                                                                |
| Space group                                        | Pccn                                                             | P2 <sub>1</sub> /c                                               | P-1                                                                                            | Pca2 <sub>1</sub>                                                                              | P-1                                                                                            | P2 <sub>1</sub> /c                                                                             | Pbca                                                                                        |
| a/Å                                                | 20.3467(3)                                                       | 6.7390(4)                                                        | 10.72961(8)                                                                                    | 20.8270(3)                                                                                     | 10.5372(2)                                                                                     | 13.79440(10)                                                                                   | 21.006(5)                                                                                   |
| b/Å                                                | 13.1849(3)                                                       | 20.3245(11)                                                      | 11.58355(6)                                                                                    | 11.8420(2)                                                                                     | 10.7422(2)                                                                                     | 17.44271(12)                                                                                   | 19.068(6)                                                                                   |
| c/Å                                                | 4.90129(8)                                                       | 5.2307(3)                                                        | 19.45445(11)                                                                                   | 15.7786(3)                                                                                     | 21.1847(5)                                                                                     | 20.42070(16)                                                                                   | 27.591(6)                                                                                   |
| α/°                                                | 90                                                               | 90                                                               | 103.8451(5)                                                                                    | 90                                                                                             | 101.388(2)                                                                                     | 90                                                                                             | 90                                                                                          |
| β/°                                                | 90                                                               | 95.700(5)                                                        | 95.7658(6)                                                                                     | 90                                                                                             | 94.545(2)                                                                                      | 94.9425(7)                                                                                     | 90                                                                                          |
| γ/°                                                | 90                                                               | 90                                                               | 102.8388(6)                                                                                    | 90                                                                                             | 115.774(2)                                                                                     | 90                                                                                             | 90                                                                                          |
| Volume/Å <sup>3</sup>                              | 1314.87(4)                                                       | 712.88(7)                                                        | 2258.65(2)                                                                                     | 3891.53(11)                                                                                    | 2079.53(8)                                                                                     | 4895.19(6)                                                                                     | 11051(5)                                                                                    |
| Z                                                  | 8                                                                | 4                                                                | 2                                                                                              | 4                                                                                              | 2                                                                                              | 4                                                                                              | 8                                                                                           |
| ρ <sub>calc</sub> /cm <sup>3</sup>                 | 1.355                                                            | 1.492                                                            | 1.620                                                                                          | 1.699                                                                                          | 1.660                                                                                          | 1.611                                                                                          | 1.285                                                                                       |
| μ/mm <sup>-1</sup>                                 | 0.752                                                            | 0.887                                                            | 12.240                                                                                         | 14.116                                                                                         | 13.239                                                                                         | 11.821                                                                                         | 2.526                                                                                       |
| F(000)                                             | 560.0                                                            | 328.0                                                            | 1080.0                                                                                         | 1936.0                                                                                         | 1020.0                                                                                         | 2340.0                                                                                         | 4496.0                                                                                      |
| Crystal size/mm <sup>3</sup>                       | 0.2 x 0.2 x 0.2                                                  | 0.2 x 0.2 x 0.15                                                 | 0.5 x 0.1 x 0.1                                                                                | 0.1 x 0.05 x 0.01                                                                              | 0.3 x 0.2 x 0.05                                                                               | 0.3 x 0.3 x 0.3                                                                                | 0.2 x 0.25 x 0.1                                                                            |
| Radiation (Å)                                      | CuKα (λ = 1.54184)                                               | CuKα (λ = 1.54184)                                               | CuKα (λ = 1.54184)                                                                             | CuKα (λ = 1.54184)                                                                             | CuKα (λ = 1.54184)                                                                             | CuKα (λ = 1.54184)                                                                             | CuKα (λ = 1.54184)                                                                          |
| 2θ range for data collection/°                     | 7.99 to 154.892                                                  | 13.204 to 160.6                                                  | 8.13 to 160.384                                                                                | 7.466 to 133.99                                                                                | 8.668 to 160.642                                                                               | 6.674 to 159.382                                                                               | 7.666 to 104.37                                                                             |
| Index ranges                                       | -25 ≤ h ≤ 25<br>-15 ≤ k ≤ 16<br>-6 ≤ l ≤ 6                       | -6 ≤ h ≤ 8<br>-25 ≤ k ≤ 25<br>-6 ≤ l ≤ 6                         | -13 ≤ h ≤ 13<br>-13 ≤ k ≤ 14<br>-24 ≤ l ≤ 24                                                   | -24 ≤ h ≤ 24,<br>13 ≤ k ≤ 14,<br>-17 ≤ l ≤ 18                                                  | -10 ≤ h ≤ 13,<br>-12 ≤ k ≤ 13,<br>-27 ≤ l ≤ 26                                                 | -17 ≤ h ≤ 17<br>-13 ≤ k ≤ 22<br>-24 ≤ l ≤ 26                                                   | -19 ≤ h ≤ 9,<br>-7 ≤ k ≤ 19,<br>-14 ≤ l ≤ 25                                                |
| Reflections collected                              | 6939                                                             | 7702                                                             | 87431                                                                                          | 20838                                                                                          | 46261                                                                                          | 55054                                                                                          | 7967                                                                                        |
| Independent reflections                            | 1371<br>R <sub>int</sub> = 0.0200<br>R <sub>sigma</sub> = 0.0116 | 1543<br>R <sub>int</sub> = 0.0679<br>R <sub>sigma</sub> = 0.0336 | 9778<br>R <sub>int</sub> = 0.0408<br>R <sub>sigma</sub> = 0.0188                               | 6585<br>R <sub>int</sub> = 0.0596,<br>R <sub>sigma</sub> = 0.0573                              | 9068<br>R <sub>int</sub> = 0.0645,<br>R <sub>sigma</sub> = 0.0435                              | R <sub>int</sub> = 0.10594<br>R <sub>sigma</sub> = 0.0315<br>R <sub>sigma</sub> = 0.0217       | 4674<br>R <sub>int</sub> = 0.1127,<br>R <sub>sigma</sub> = 0.1866                           |
| Data/restraints/parameters                         | 1371/0/100                                                       | 1543/0/109                                                       | 9778/0/551                                                                                     | 6585/19/478                                                                                    | 9068/0/500                                                                                     | 10594/0/596                                                                                    | 4674/0/642                                                                                  |
| Goodness-of-fit on F <sup>2</sup> (S) <sup>a</sup> | 1.079                                                            | 1.044                                                            | 1.122                                                                                          | 1.001                                                                                          | 1.158                                                                                          | 1.119                                                                                          | 0.979                                                                                       |
| Final R indexes [I ≥ 2σ(I)] <sup>b</sup>           | R <sub>1</sub> = 0.0321<br>wR <sub>2</sub> = 0.0865              | R <sub>1</sub> = 0.0552<br>wR <sub>2</sub> = 0.1445              | R <sub>1</sub> = 0.0234<br>wR <sub>2</sub> = 0.0574                                            | R <sub>1</sub> = 0.0336,<br>wR <sub>2</sub> = 0.0802                                           | R <sub>1</sub> = 0.1064,<br>wR <sub>2</sub> = 0.2949                                           | R <sub>1</sub> = 0.0290,<br>wR <sub>2</sub> = 0.0804                                           | R <sub>1</sub> = 0.0902,<br>wR <sub>2</sub> = 0.2112                                        |
| Final R indexes [all data] <sup>b</sup>            | R <sub>1</sub> = 0.0333<br>wR <sub>2</sub> = 0.0875              | R <sub>1</sub> = 0.0644<br>wR <sub>2</sub> = 0.1537              | R <sub>1</sub> = 0.0242<br>wR <sub>2</sub> = 0.0577                                            | R <sub>1</sub> = 0.0373,<br>wR <sub>2</sub> = 0.0817                                           | R <sub>1</sub> = 0.1076,<br>wR <sub>2</sub> = 0.2952                                           | R <sub>1</sub> = 0.0300,<br>wR <sub>2</sub> = 0.0812                                           | R <sub>1</sub> = 0.1735,<br>wR <sub>2</sub> = 0.2613                                        |
| Largest diff. peak/hole / e Å <sup>-3</sup>        | 0.22/-0.17                                                       | 0.27/-0.26                                                       | 1.24/-1.54                                                                                     | 1.76/-1.63                                                                                     | 11.78/-8.77                                                                                    | 1.30/-1.24                                                                                     | 0.79/-0.36                                                                                  |

Programs for diffractometer operation, data collection, data reduction, and absorption correction were those supplied by Rigaku.

<sup>a</sup>  $S = [w(F_o^2 - F_c^2)^2 / (n - p)]^{1/2}$  ( $n$  = number of data;  $p$  = number of parameters varied;  $w = [(\sigma^2(F_o^2) + (0.0540P)^2 + 22.8160P)]^{-1}$  where  $P = [\text{Max}(F_o^2, 0) + 2F_c^2]/3$ ).

<sup>b</sup>  $R_1 = \sum ||F_o| - |F_c|| / \sum |F_o|$ ;  $wR_2 = [\sum w(F_o^2 - F_c^2)^2 / \sum w(F_o^4)]^{1/2}$

**Table S2.** Fractional Atomic Coordinates ( $\times 10^4$ ) and Equivalent Isotropic Displacement Parameters ( $\text{\AA}^2 \times 10^3$ ) for 2-azidoaniline.  $U_{\text{eq}}$  is defined as 1/3 of the trace of the orthogonalised  $U_{\text{II}}$  tensor.

| Atom | <i>x</i>  | <i>y</i>  | <i>z</i>    | $U(\text{eq})$ |
|------|-----------|-----------|-------------|----------------|
| N1   | 7030.7(4) | 3542.1(6) | 2775.2(18)  | 20.2(2)        |
| N3   | 5653.7(4) | 3514.0(6) | 8507.7(19)  | 21.3(2)        |
| N2   | 6085.2(4) | 3513.0(7) | 6711.1(18)  | 22.2(2)        |
| N4   | 5278.4(5) | 3410.0(7) | 10191.6(19) | 27.3(3)        |
| C1   | 6668.2(5) | 4428.0(7) | 3252(2)     | 19.0(2)        |
| C2   | 6186.0(5) | 4451.9(8) | 5299(2)     | 19.5(2)        |
| C4   | 5977.9(5) | 6220.4(8) | 4449(2)     | 26.2(3)        |
| C3   | 5841.6(5) | 5336.9(8) | 5876(2)     | 23.1(3)        |
| C6   | 6799.4(5) | 5326.0(8) | 1848(2)     | 23.2(3)        |
| C5   | 6460.7(5) | 6213.9(8) | 2445(2)     | 27.3(3)        |

**Table S3.** Anisotropic Displacement Parameters ( $\text{\AA}^2 \times 10^3$ ) for 2-azidoaniline. The Anisotropic displacement factor exponent takes the form:  $-2\pi^2[h^2a^*2U_{11}+2hka^*b^*U_{12}+\dots]$ .

| Atom | $U_{11}$ | $U_{22}$ | $U_{33}$ | $U_{23}$ | $U_{13}$ | $U_{12}$ |
|------|----------|----------|----------|----------|----------|----------|
| N1   | 22.2(4)  | 17.7(4)  | 20.6(4)  | -0.6(3)  | 2.3(3)   | 0.4(3)   |
| N3   | 22.3(4)  | 18.6(4)  | 22.9(5)  | -1.4(3)  | -1.1(4)  | 2.4(3)   |
| N2   | 24.4(5)  | 19.1(5)  | 23.1(5)  | -0.5(3)  | 5.2(4)   | 1.9(3)   |
| N4   | 27.6(5)  | 27.1(5)  | 27.3(5)  | 1.1(4)   | 6.0(4)   | 3.7(4)   |
| C1   | 19.5(5)  | 17.9(5)  | 19.7(5)  | -2.3(4)  | -4.1(4)  | 0.2(4)   |
| C2   | 20.8(5)  | 17.4(5)  | 20.3(5)  | -1.4(4)  | -3.5(4)  | -0.6(4)  |
| C4   | 27.5(5)  | 17.9(5)  | 33.3(6)  | -3.4(4)  | -5.9(5)  | 5.1(4)   |
| C3   | 22.1(5)  | 21.9(5)  | 25.2(5)  | -4.6(4)  | -1.3(4)  | 2.1(4)   |
| C6   | 23.9(5)  | 22.9(5)  | 22.8(5)  | 1.3(4)   | -1.4(4)  | -0.2(4)  |
| C5   | 31.0(6)  | 19.9(6)  | 31.1(6)  | 3.9(4)   | -5.4(5)  | 0.7(4)   |

**Table S4.** Bond Lengths for 2-azidoaniline.

| Atom | Atom | Length/ $\text{\AA}$ | Atom | Atom | Length/ $\text{\AA}$ |
|------|------|----------------------|------|------|----------------------|
| N1   | C1   | 1.4010(13)           | C1   | C6   | 1.3952(15)           |
| N3   | N2   | 1.2436(12)           | C2   | C3   | 1.3902(14)           |
| N3   | N4   | 1.1327(13)           | C4   | C3   | 1.3868(16)           |
| N2   | C2   | 1.4331(13)           | C4   | C5   | 1.3891(17)           |
| C1   | C2   | 1.4036(15)           | C6   | C5   | 1.3896(15)           |

**Table S5.** Bond Angles for 2-azidoaniline.

| Atom | Atom | Atom | Angle/°    | Atom | Atom | Atom | Angle/°    |
|------|------|------|------------|------|------|------|------------|
| N4   | N3   | N2   | 172.66(10) | C3   | C2   | N2   | 123.69(9)  |
| N3   | N2   | C2   | 116.24(8)  | C3   | C2   | C1   | 121.11(10) |
| N1   | C1   | C2   | 120.39(9)  | C3   | C4   | C5   | 119.53(10) |
| C6   | C1   | N1   | 121.63(9)  | C4   | C3   | C2   | 120.10(10) |
| C6   | C1   | C2   | 117.85(9)  | C5   | C6   | C1   | 121.08(10) |
| C1   | C2   | N2   | 115.20(9)  | C4   | C5   | C6   | 120.32(10) |

**Table S6.** Torsion Angles for 2-azidoaniline.

| A  | B  | C  | D  | Angle/°     | A  | B  | C  | D  | Angle/°    |
|----|----|----|----|-------------|----|----|----|----|------------|
| N1 | C1 | C2 | N2 | -2.44(13)   | C1 | C6 | C5 | C4 | -0.57(16)  |
| N1 | C1 | C2 | C3 | 177.23(9)   | C2 | C1 | C6 | C5 | -0.40(15)  |
| N1 | C1 | C6 | C5 | -176.44(10) | C3 | C4 | C5 | C6 | 0.81(16)   |
| N3 | N2 | C2 | C1 | -179.05(9)  | C6 | C1 | C2 | N2 | -178.53(9) |
| N3 | N2 | C2 | C3 | 1.29(15)    | C6 | C1 | C2 | C3 | 1.14(15)   |
| N2 | C2 | C3 | C4 | 178.73(9)   | C5 | C4 | C3 | C2 | -0.07(16)  |
| C1 | C2 | C3 | C4 | -0.92(16)   |    |    |    |    |            |

**Table S7.** Hydrogen Atom Coordinates ( $\text{\AA} \times 10^4$ ) and Isotropic Displacement Parameters ( $\text{\AA}^2 \times 10^3$ ) for 2-azidoaniline.

| Atom | x    | y    | z    | U(eq) |
|------|------|------|------|-------|
| H1A  | 6775 | 3024 | 2869 | 24    |
| H1B  | 7205 | 3571 | 1177 | 24    |
| H4   | 5748 | 6813 | 4830 | 31    |
| H3   | 5519 | 5337 | 7221 | 28    |
| H6   | 7119 | 5330 | 490  | 28    |
| H5   | 6558 | 6807 | 1498 | 33    |

**Table S8.** Fractional Atomic Coordinates ( $\times 10^4$ ) and Equivalent Isotropic Displacement Parameters ( $\text{\AA}^2 \times 10^3$ ) for 1,2-diazidobenzene.  $U_{\text{eq}}$  is defined as 1/3 of the trace of the orthogonalised  $U_{\text{ij}}$  tensor.

| Atom | x       | y         | z       | U(eq)   |
|------|---------|-----------|---------|---------|
| C1   | 6532(2) | 5882.1(7) | 5109(3) | 32.3(4) |
| C2   | 6677(2) | 6328.2(8) | 3100(3) | 32.4(4) |
| C3   | 5149(3) | 6778.2(8) | 2465(3) | 35.0(4) |
| C4   | 3467(3) | 6777.0(8) | 3805(3) | 37.9(4) |
| C5   | 3318(3) | 6329.8(9) | 5786(3) | 39.0(4) |
| C6   | 4845(2) | 5886.9(8) | 6438(3) | 36.0(4) |
| N1   | 8187(2) | 5450.9(7) | 5665(3) | 37.3(4) |
| N2   | 8016(2) | 5055.2(7) | 7454(3) | 35.2(4) |

|    |         |           |          |         |
|----|---------|-----------|----------|---------|
| N3 | 8033(2) | 4676.4(7) | 9033(3)  | 39.9(4) |
| N4 | 8438(2) | 6285.5(7) | 1816(3)  | 38.4(4) |
| N5 | 8657(2) | 6703.3(7) | 133(3)   | 35.4(4) |
| N6 | 9063(3) | 7045.1(8) | -1440(3) | 42.2(4) |

**Table S9.** Anisotropic Displacement Parameters ( $\text{\AA}^2 \times 10^3$ ) for 1,2-diazidobenzene. The Anisotropic displacement factor exponent takes the form:  $-2\pi^2[h^2a^{*2}U_{11}+2hka^*b^*U_{12}+\dots]$ .

| Atom | $U_{11}$ | $U_{22}$ | $U_{33}$ | $U_{23}$ | $U_{13}$ | $U_{12}$ |
|------|----------|----------|----------|----------|----------|----------|
| C1   | 32.5(8)  | 29.8(8)  | 34.5(8)  | -3.6(6)  | 1.9(6)   | -0.5(6)  |
| C2   | 31.5(8)  | 32.9(8)  | 32.9(8)  | -3.7(6)  | 3.6(6)   | -1.0(6)  |
| C3   | 37.8(8)  | 30.2(8)  | 36.5(9)  | -0.8(6)  | 1.6(6)   | -0.6(6)  |
| C4   | 34.3(8)  | 34.0(8)  | 44.7(10) | -6.3(7)  | 0.3(7)   | 3.2(6)   |
| C5   | 34.7(8)  | 41.1(9)  | 41.9(10) | -7.0(7)  | 7.4(7)   | -2.0(7)  |
| C6   | 36.5(9)  | 36.4(9)  | 35.3(9)  | -2.0(6)  | 4.2(6)   | -2.5(7)  |
| N1   | 35.9(8)  | 36.8(7)  | 39.5(8)  | 6.2(6)   | 5.4(6)   | 2.1(5)   |
| N2   | 34.0(7)  | 34.5(7)  | 36.9(8)  | -0.8(6)  | 2.7(5)   | -0.4(5)  |
| N3   | 41.1(8)  | 37.6(8)  | 40.7(8)  | 3.3(6)   | 2.4(6)   | -0.2(6)  |
| N4   | 39.3(8)  | 36.3(7)  | 40.7(8)  | 6.2(6)   | 9.3(6)   | 4.2(6)   |
| N5   | 37.3(7)  | 34.3(7)  | 35.0(7)  | -1.8(6)  | 5.3(5)   | -0.9(5)  |
| N6   | 48.2(9)  | 38.6(8)  | 41.0(8)  | 1.8(6)   | 9.9(6)   | -2.8(6)  |

**Table S10.** Bond Lengths for 1,2-diazidobenzene.

| Atom | Atom | Length/ $\text{\AA}$ | Atom | Atom | Length/ $\text{\AA}$ |
|------|------|----------------------|------|------|----------------------|
| C1   | C2   | 1.398(2)             | C4   | C5   | 1.389(3)             |
| C1   | C6   | 1.390(2)             | C5   | C6   | 1.384(2)             |
| C1   | N1   | 1.426(2)             | N1   | N2   | 1.2476(19)           |
| C2   | C3   | 1.393(2)             | N2   | N3   | 1.129(2)             |
| C2   | N4   | 1.423(2)             | N4   | N5   | 1.2425(19)           |
| C3   | C4   | 1.390(2)             | N5   | N6   | 1.131(2)             |

**Table S11.** Bond Angles for 1,2-diazidobenzene.

| Atom | Atom | Atom | Angle/ $^\circ$ | Atom | Atom | Atom | Angle/ $^\circ$ |
|------|------|------|-----------------|------|------|------|-----------------|
| C2   | C1   | N1   | 116.10(14)      | C5   | C4   | C3   | 120.00(15)      |
| C6   | C1   | C2   | 119.56(15)      | C6   | C5   | C4   | 120.15(16)      |
| C6   | C1   | N1   | 124.34(15)      | C5   | C6   | C1   | 120.39(16)      |
| C1   | C2   | N4   | 116.04(14)      | N2   | N1   | C1   | 114.85(13)      |
| C3   | C2   | C1   | 119.97(15)      | N3   | N2   | N1   | 173.55(16)      |
| C3   | C2   | N4   | 123.99(15)      | N5   | N4   | C2   | 117.14(14)      |
| C4   | C3   | C2   | 119.94(16)      | N6   | N5   | N4   | 171.74(17)      |



**Table S12.** Torsion Angles for 1,2-diazidobenzene.

| A  | B  | C  | D  | Angle/°     | A  | B  | C  | D  | Angle/°     |
|----|----|----|----|-------------|----|----|----|----|-------------|
| C1 | C2 | C3 | C4 | -0.9(2)     | C6 | C1 | C2 | C3 | 0.7(2)      |
| C1 | C2 | N4 | N5 | -175.65(14) | C6 | C1 | C2 | N4 | -179.22(14) |
| C2 | C1 | C6 | C5 | 0.0(2)      | C6 | C1 | N1 | N2 | 1.2(2)      |
| C2 | C1 | N1 | N2 | -179.58(13) | N1 | C1 | C2 | C3 | -178.48(14) |
| C2 | C3 | C4 | C5 | 0.4(2)      | N1 | C1 | C2 | N4 | 1.6(2)      |
| C3 | C2 | N4 | N5 | 4.4(2)      | N1 | C1 | C6 | C5 | 179.13(15)  |
| C3 | C4 | C5 | C6 | 0.3(2)      | N4 | C2 | C3 | C4 | 179.03(15)  |
| C4 | C5 | C6 | C1 | -0.5(3)     |    |    |    |    |             |

**Table S13.** Hydrogen Atom Coordinates ( $\text{\AA} \times 10^4$ ) and Isotropic Displacement Parameters ( $\text{\AA}^2 \times 10^3$ ) for 1,2-diazidobenzene.

| Atom | x    | y    | z    | U(eq) |
|------|------|------|------|-------|
| H3   | 5256 | 7086 | 1118 | 42    |
| H4   | 2420 | 7082 | 3366 | 45    |
| H5   | 2166 | 6328 | 6694 | 47    |
| H6   | 4741 | 5584 | 7803 | 43    |

**Table S14.** Fractional Atomic Coordinates ( $\times 10^4$ ) and Equivalent Isotropic Displacement Parameters ( $\text{\AA}^2 \times 10^3$ ) for Complex **1**.  $U_{\text{eq}}$  is defined as 1/3 of the trace of the orthogonalised  $U_{\text{ij}}$  tensor.

| Atom | x        | y       | z          | U(eq)   |
|------|----------|---------|------------|---------|
| C1   | 4834(3)  | 4173(3) | 886.6(15)  | 17.0(5) |
| C2   | 4084(3)  | 3710(3) | 205.8(16)  | 23.5(6) |
| C3   | 3064(3)  | 4211(3) | 44.0(17)   | 27.0(7) |
| C4   | 2794(3)  | 5152(3) | 555.8(18)  | 27.6(7) |
| C5   | 3523(3)  | 5615(3) | 1235.7(17) | 23.0(6) |
| C6   | 4548(3)  | 5118(3) | 1403.1(15) | 16.6(5) |
| C7   | 8613(3)  | 6095(3) | 4102.8(15) | 16.6(5) |
| C8   | 8219(3)  | 7201(3) | 4274.8(15) | 16.4(5) |
| C9   | 8984(3)  | 8227(3) | 4813.9(17) | 22.8(6) |
| C10  | 10126(3) | 8166(3) | 5182.9(19) | 29.2(7) |
| C11  | 10503(3) | 7068(3) | 5020.9(19) | 30.1(7) |
| C12  | 9771(3)  | 6055(3) | 4488.5(17) | 24.0(6) |
| C13  | 9794(3)  | 2622(3) | 1533.0(17) | 20.1(6) |
| C14  | 9888(3)  | 3336(3) | 2242.3(18) | 24.8(6) |
| C15  | 11133(4) | 3799(4) | 2660(2)    | 38.3(9) |
| C16  | 12210(3) | 3540(4) | 2396(2)    | 37.9(9) |
| C17  | 12114(3) | 2821(3) | 1702(2)    | 30.2(7) |
| C18  | 10912(3) | 2372(3) | 1271.0(18) | 24.8(6) |
| C19  | 8412(3)  | 1708(3) | 59.6(16)   | 22.1(6) |

|     |           |            |             |           |
|-----|-----------|------------|-------------|-----------|
| C20 | 9137(3)   | 2679(3)    | -161.4(19)  | 29.0(7)   |
| C21 | 9219(4)   | 2542(4)    | -879(2)     | 37.6(9)   |
| C22 | 8583(4)   | 1450(4)    | -1381(2)    | 41.4(10)  |
| C23 | 7853(5)   | 487(4)     | -1172.8(19) | 40.1(9)   |
| C24 | 7769(4)   | 608(3)     | -446.1(18)  | 30.8(7)   |
| C25 | 7529(3)   | 544(3)     | 1159.9(15)  | 19.8(6)   |
| C26 | 8309(4)   | -217(3)    | 1299.5(18)  | 27.4(7)   |
| C27 | 7759(4)   | -1316(3)   | 1445.4(18)  | 33.8(8)   |
| C28 | 6450(4)   | -1655(3)   | 1449.8(17)  | 32.6(8)   |
| C29 | 5662(4)   | -909(3)    | 1308.0(19)  | 34.9(8)   |
| C30 | 6198(3)   | 197(3)     | 1162.3(18)  | 27.4(7)   |
| C31 | 5497(3)   | 6802(3)    | 4412.2(16)  | 17.9(5)   |
| C32 | 4201(3)   | 6317(3)    | 4094.3(17)  | 24.3(6)   |
| C33 | 3295(3)   | 5915(3)    | 4499(2)     | 31.6(8)   |
| C34 | 3659(4)   | 6003(3)    | 5215(2)     | 31.0(8)   |
| C35 | 4936(4)   | 6498(3)    | 5536.6(18)  | 28.0(7)   |
| C36 | 5863(3)   | 6895(3)    | 5138.5(17)  | 22.6(6)   |
| C37 | 6714(3)   | 8823(3)    | 3858.0(15)  | 17.1(5)   |
| C38 | 7133(3)   | 9200(3)    | 3275.1(16)  | 24.2(6)   |
| C39 | 7139(4)   | 10377(3)   | 3225.6(17)  | 28.3(7)   |
| C40 | 6738(3)   | 11172(3)   | 3760.9(18)  | 25.0(7)   |
| C41 | 6352(3)   | 10809(3)   | 4348.5(18)  | 24.5(6)   |
| C42 | 6324(3)   | 9628(3)    | 4400.0(17)  | 22.7(6)   |
| Cl1 | 5316.3(7) | 2678.0(6)  | 2523.5(4)   | 22.05(14) |
| Cl2 | 8721.2(8) | 6180.1(7)  | 1986.2(5)   | 31.52(17) |
| N1  | 7409(2)   | 2979(2)    | 1223.2(13)  | 19.6(5)   |
| N2  | 6375(2)   | 3016(2)    | 774.4(13)   | 17.9(5)   |
| N3  | 5917(2)   | 3825(2)    | 1152.0(13)  | 18.2(5)   |
| N4  | 6411(2)   | 6341(2)    | 3073.4(13)  | 18.1(5)   |
| N5  | 5412(2)   | 6319(2)    | 2580.3(13)  | 16.2(5)   |
| N6  | 5402(2)   | 5423(2)    | 2051.2(13)  | 17.5(5)   |
| O1  | 8868(2)   | 3579(2)    | 2517.3(12)  | 27.0(5)   |
| O2  | 7922(2)   | 5098.7(18) | 3603.0(10)  | 17.5(4)   |
| P1  | 8247.2(7) | 1978.6(6)  | 987.3(4)    | 16.63(14) |
| P2  | 6682.4(6) | 7273.9(6)  | 3877.1(4)   | 14.03(13) |
| U1  | 7257.0(2) | 4456.5(2)  | 2424.9(2)   | 13.38(3)  |

**Table S15.** Anisotropic Displacement Parameters ( $\text{\AA}^2 \times 10^3$ ) for Complex **1**. The Anisotropic displacement factor exponent takes the form:  $-2\pi^2[h^2a^{*2}U_{11}+2hka^*b^*U_{12}+\dots]$ .

| Atom | $U_{11}$ | $U_{22}$ | $U_{33}$ | $U_{23}$ | $U_{13}$ | $U_{12}$ |
|------|----------|----------|----------|----------|----------|----------|
| C1   | 18.5(13) | 17.2(13) | 15.1(13) | 4.1(11)  | 0.1(10)  | 5.8(11)  |
| C2   | 27.2(15) | 25.5(15) | 15.9(14) | 0.2(12)  | 1.4(12)  | 9.3(12)  |
| C3   | 26.3(16) | 32.7(17) | 17.9(15) | 1.6(13)  | -7.3(12) | 9.6(13)  |

|     |          |          |          |          |          |          |
|-----|----------|----------|----------|----------|----------|----------|
| C4  | 25.6(16) | 29.3(17) | 27.3(17) | 4.0(13)  | -4.5(13) | 13.8(13) |
| C5  | 25.7(15) | 21.8(15) | 21.1(15) | 0.8(12)  | 1.9(12)  | 11.6(12) |
| C6  | 17.2(13) | 17.2(13) | 15.1(13) | 4.4(11)  | -1.0(10) | 5.2(10)  |
| C7  | 18.1(13) | 16.4(13) | 14.7(13) | 4.1(10)  | 3.3(10)  | 2.7(10)  |
| C8  | 16.0(13) | 17.8(13) | 15.3(13) | 3.0(11)  | 2.4(10)  | 5.5(10)  |
| C9  | 22.4(14) | 17.5(14) | 23.5(15) | -3.3(12) | -1.3(12) | 7.1(12)  |
| C10 | 22.3(15) | 23.9(16) | 31.9(18) | -3.7(13) | -8.7(13) | 4.5(12)  |
| C11 | 21.4(15) | 27.7(17) | 36.1(19) | 1.8(14)  | -9.5(13) | 9.5(13)  |
| C12 | 22.4(15) | 23.4(15) | 27.0(16) | 4.7(12)  | 1.7(12)  | 10.7(12) |
| C13 | 18.7(14) | 16.3(13) | 26.6(15) | 5.9(12)  | 4.3(12)  | 6.8(11)  |
| C14 | 24.5(15) | 24.3(16) | 25.8(16) | 3.8(13)  | 2.6(12)  | 10.8(12) |
| C15 | 29.6(18) | 42(2)    | 35(2)    | -7.7(16) | -6.2(15) | 18.5(16) |
| C16 | 21.9(16) | 34.6(19) | 51(2)    | 1.7(17)  | -3.8(15) | 8.6(14)  |
| C17 | 18.5(15) | 27.9(17) | 48(2)    | 12.3(15) | 10.5(14) | 10.3(13) |
| C18 | 24.4(15) | 24.3(16) | 29.8(17) | 7.4(13)  | 10.8(13) | 11.3(12) |
| C19 | 28.9(15) | 25.2(15) | 18.6(14) | 6.9(12)  | 9.3(12)  | 16.0(13) |
| C20 | 35.5(18) | 27.0(17) | 31.5(18) | 11.3(14) | 14.9(14) | 14.7(14) |
| C21 | 48(2)    | 45(2)    | 37(2)    | 23.0(17) | 26.3(17) | 24.5(18) |
| C22 | 66(3)    | 53(2)    | 23.4(17) | 16.3(17) | 22.9(18) | 37(2)    |
| C23 | 69(3)    | 36(2)    | 20.5(17) | 3.1(15)  | 9.8(17)  | 27.9(19) |
| C24 | 49(2)    | 24.8(16) | 21.6(16) | 4.6(13)  | 10.0(15) | 15.1(15) |
| C25 | 27.7(15) | 14.9(13) | 14.8(13) | 0.3(10)  | 5.4(11)  | 4.6(11)  |
| C26 | 36.6(18) | 23.7(16) | 24.8(16) | 7.4(13)  | 6.3(14)  | 11.8(14) |
| C27 | 56(2)    | 21.7(16) | 23.9(17) | 6.0(13)  | 2.9(16)  | 12.5(16) |
| C28 | 58(2)    | 14.9(15) | 17.2(15) | 2.3(12)  | 2.4(15)  | -3.2(14) |
| C29 | 36.3(19) | 31.1(18) | 28.7(18) | 6.5(14)  | 4.0(15)  | -6.8(15) |
| C30 | 30.2(17) | 22.5(16) | 26.9(16) | 4.2(13)  | 4.4(13)  | 4.6(13)  |
| C31 | 20.8(14) | 14.4(13) | 19.0(14) | 2.7(11)  | 4.1(11)  | 7.2(11)  |
| C32 | 22.4(15) | 24.9(16) | 22.7(15) | 0.4(12)  | 5.5(12)  | 5.8(12)  |
| C33 | 24.7(16) | 26.6(17) | 37.3(19) | -0.4(14) | 11.0(14) | 0.8(13)  |
| C34 | 39.8(19) | 17.7(15) | 41(2)    | 8.7(14)  | 27.6(16) | 9.2(13)  |
| C35 | 43.4(19) | 25.8(16) | 25.3(16) | 10.9(13) | 16.0(14) | 21.1(15) |
| C36 | 27.0(15) | 23.7(15) | 20.6(15) | 5.9(12)  | 6.9(12)  | 12.6(12) |
| C37 | 16.6(13) | 15.3(13) | 18.3(14) | 1.9(11)  | 0.3(10)  | 5.8(10)  |
| C38 | 35.7(17) | 19.3(15) | 15.5(14) | 1.7(11)  | 3.9(12)  | 6.3(13)  |
| C39 | 41.9(19) | 21.9(16) | 18.4(15) | 6.5(12)  | 0.8(13)  | 3.4(14)  |
| C40 | 24.0(15) | 15.9(14) | 30.9(17) | 4.0(12)  | -6.7(13) | 4.1(12)  |
| C41 | 23.3(15) | 17.5(14) | 33.7(17) | 3.6(12)  | 7.0(13)  | 9.7(12)  |
| C42 | 21.7(14) | 19.9(14) | 26.0(16) | 4.1(12)  | 5.6(12)  | 5.7(12)  |
| CI1 | 21.8(3)  | 22.2(3)  | 21.3(3)  | 6.6(3)   | 3.5(3)   | 3.3(3)   |
| CI2 | 31.1(4)  | 28.9(4)  | 40.1(4)  | 17.2(3)  | 14.3(3)  | 6.7(3)   |
| N1  | 21.9(12) | 21.7(12) | 16.5(12) | 2.1(10)  | 2.1(9)   | 11.8(10) |
| N2  | 20.2(12) | 18.5(12) | 15.1(11) | 3.0(9)   | 3.5(9)   | 6.8(9)   |
| N3  | 20.1(12) | 18.4(12) | 17.6(12) | 3.2(9)   | 4.9(9)   | 8.7(10)  |

|    |          |          |          |         |         |          |
|----|----------|----------|----------|---------|---------|----------|
| N4 | 19.3(11) | 21.4(12) | 12.8(11) | 1.7(9)  | -0.1(9) | 7.7(10)  |
| N5 | 15.8(11) | 15.8(11) | 15.9(11) | 2.0(9)  | 1.9(9)  | 4.9(9)   |
| N6 | 21.8(12) | 14.5(11) | 13.8(11) | -0.1(9) | 2.6(9)  | 4.3(9)   |
| O1 | 24.0(11) | 38.8(13) | 21.7(11) | 2.3(9)  | 0.9(9)  | 22.5(10) |
| O2 | 24.4(10) | 15.6(9)  | 11.2(9)  | 0.8(7)  | -1.1(8) | 6.9(8)   |
| P1 | 19.7(3)  | 15.8(3)  | 16.0(3)  | 2.9(3)  | 5.8(3)  | 7.9(3)   |
| P2 | 15.3(3)  | 13.7(3)  | 12.5(3)  | 1.0(2)  | 1.7(2)  | 5.5(2)   |
| U1 | 15.88(5) | 12.94(5) | 11.81(5) | 1.93(3) | 2.69(3) | 5.97(3)  |

**Table S16.** Bond Lengths for Complex 1.

| Atom | Atom | Length/Å | Atom | Atom | Length/Å  |
|------|------|----------|------|------|-----------|
| C1   | C2   | 1.394(4) | C25  | P1   | 1.794(3)  |
| C1   | C6   | 1.410(4) | C26  | C27  | 1.386(5)  |
| C1   | N3   | 1.402(4) | C27  | C28  | 1.373(6)  |
| C2   | C3   | 1.391(4) | C28  | C29  | 1.389(6)  |
| C3   | C4   | 1.393(5) | C29  | C30  | 1.390(5)  |
| C4   | C5   | 1.384(4) | C31  | C32  | 1.394(4)  |
| C5   | C6   | 1.395(4) | C31  | C36  | 1.400(4)  |
| C6   | N6   | 1.402(4) | C31  | P2   | 1.797(3)  |
| C7   | C8   | 1.413(4) | C32  | C33  | 1.382(5)  |
| C7   | C12  | 1.401(4) | C33  | C34  | 1.383(5)  |
| C7   | O2   | 1.329(3) | C34  | C35  | 1.380(5)  |
| C8   | C9   | 1.409(4) | C35  | C36  | 1.386(5)  |
| C8   | P2   | 1.778(3) | C37  | C38  | 1.389(4)  |
| C9   | C10  | 1.381(4) | C37  | C42  | 1.396(4)  |
| C10  | C11  | 1.394(5) | C37  | P2   | 1.796(3)  |
| C11  | C12  | 1.383(5) | C38  | C39  | 1.388(5)  |
| C13  | C14  | 1.409(4) | C39  | C40  | 1.387(5)  |
| C13  | C18  | 1.411(4) | C40  | C41  | 1.380(5)  |
| C13  | P1   | 1.776(3) | C41  | C42  | 1.389(4)  |
| C14  | C15  | 1.410(5) | C11  | U1   | 2.6419(7) |
| C14  | O1   | 1.322(4) | C12  | U1   | 2.6218(8) |
| C15  | C16  | 1.374(5) | N1   | N2   | 1.357(3)  |
| C16  | C17  | 1.388(5) | N1   | P1   | 1.629(2)  |
| C17  | C18  | 1.383(5) | N1   | U1   | 2.590(2)  |
| C19  | C20  | 1.402(5) | N2   | N3   | 1.268(3)  |
| C19  | C24  | 1.393(5) | N3   | U1   | 2.586(2)  |
| C19  | P1   | 1.790(3) | N4   | N5   | 1.357(3)  |
| C20  | C21  | 1.382(5) | N4   | P2   | 1.630(2)  |
| C21  | C22  | 1.381(6) | N4   | U1   | 2.641(2)  |
| C22  | C23  | 1.383(6) | N5   | N6   | 1.272(3)  |
| C23  | C24  | 1.401(5) | N6   | U1   | 2.613(2)  |
| C25  | C26  | 1.396(4) | O1   | U1   | 2.204(2)  |

|     |     |          |    |    |            |
|-----|-----|----------|----|----|------------|
| C25 | C30 | 1.396(5) | O2 | U1 | 2.2213(19) |
|-----|-----|----------|----|----|------------|

**Table S17.** Bond Angles for Complex 1.

| Atom | Atom | Atom | Angle/°  | Atom | Atom | Atom | Angle/°    |
|------|------|------|----------|------|------|------|------------|
| C2   | C1   | C6   | 120.5(3) | C41  | C40  | C39  | 120.5(3)   |
| C2   | C1   | N3   | 127.9(3) | C40  | C41  | C42  | 120.3(3)   |
| N3   | C1   | C6   | 111.6(2) | C41  | C42  | C37  | 119.3(3)   |
| C3   | C2   | C1   | 118.7(3) | N2   | N1   | P1   | 121.38(19) |
| C2   | C3   | C4   | 120.5(3) | N2   | N1   | U1   | 102.88(16) |
| C5   | C4   | C3   | 121.5(3) | P1   | N1   | U1   | 134.75(13) |
| C4   | C5   | C6   | 118.5(3) | N3   | N2   | N1   | 103.7(2)   |
| C5   | C6   | C1   | 120.4(3) | C1   | N3   | U1   | 131.03(18) |
| C5   | C6   | N6   | 128.7(3) | N2   | N3   | C1   | 122.7(2)   |
| N6   | C6   | C1   | 110.9(2) | N2   | N3   | U1   | 106.11(18) |
| C12  | C7   | C8   | 117.9(3) | N5   | N4   | P2   | 120.62(19) |
| O2   | C7   | C8   | 122.7(3) | N5   | N4   | U1   | 102.56(16) |
| O2   | C7   | C12  | 119.4(3) | P2   | N4   | U1   | 136.20(13) |
| C7   | C8   | P2   | 120.6(2) | N6   | N5   | N4   | 104.1(2)   |
| C9   | C8   | C7   | 120.3(3) | C6   | N6   | U1   | 130.41(18) |
| C9   | C8   | P2   | 118.8(2) | N5   | N6   | C6   | 122.7(2)   |
| C10  | C9   | C8   | 120.6(3) | N5   | N6   | U1   | 106.81(17) |
| C9   | C10  | C11  | 119.0(3) | C14  | O1   | U1   | 145.2(2)   |
| C12  | C11  | C10  | 121.2(3) | C7   | O2   | U1   | 140.11(18) |
| C11  | C12  | C7   | 120.9(3) | C13  | P1   | C19  | 109.99(15) |
| C14  | C13  | C18  | 120.2(3) | C13  | P1   | C25  | 108.89(14) |
| C14  | C13  | P1   | 119.5(2) | C19  | P1   | C25  | 109.04(14) |
| C18  | C13  | P1   | 120.3(2) | N1   | P1   | C13  | 105.57(13) |
| C13  | C14  | C15  | 117.3(3) | N1   | P1   | C19  | 112.05(14) |
| O1   | C14  | C13  | 122.5(3) | N1   | P1   | C25  | 111.22(14) |
| O1   | C14  | C15  | 120.2(3) | C8   | P2   | C31  | 108.63(13) |
| C16  | C15  | C14  | 121.6(3) | C8   | P2   | C37  | 110.34(13) |
| C15  | C16  | C17  | 121.1(3) | C37  | P2   | C31  | 108.26(13) |
| C18  | C17  | C16  | 118.9(3) | N4   | P2   | C8   | 105.15(13) |
| C17  | C18  | C13  | 120.9(3) | N4   | P2   | C31  | 112.33(13) |
| C20  | C19  | P1   | 117.9(2) | N4   | P2   | C37  | 112.07(13) |
| C24  | C19  | C20  | 119.9(3) | Cl2  | U1   | Cl1  | 163.07(3)  |
| C24  | C19  | P1   | 122.1(3) | Cl2  | U1   | N4   | 81.17(6)   |
| C21  | C20  | C19  | 120.0(3) | N1   | U1   | Cl1  | 86.20(6)   |
| C22  | C21  | C20  | 120.1(4) | N1   | U1   | Cl2  | 85.69(6)   |
| C21  | C22  | C23  | 120.7(3) | N1   | U1   | N4   | 147.29(8)  |
| C22  | C23  | C24  | 119.9(4) | N1   | U1   | N6   | 102.50(7)  |
| C19  | C24  | C23  | 119.4(3) | N3   | U1   | Cl1  | 78.59(6)   |
| C26  | C25  | C30  | 120.2(3) | N3   | U1   | Cl2  | 85.01(6)   |

|     |     |     |          |    |    |     |           |
|-----|-----|-----|----------|----|----|-----|-----------|
| C26 | C25 | P1  | 119.7(2) | N3 | U1 | N1  | 47.02(8)  |
| C30 | C25 | P1  | 120.1(2) | N3 | U1 | N4  | 101.78(7) |
| C27 | C26 | C25 | 119.8(3) | N3 | U1 | N6  | 55.64(7)  |
| C28 | C27 | C26 | 120.1(3) | N4 | U1 | Cl1 | 97.98(6)  |
| C27 | C28 | C29 | 120.8(3) | N6 | U1 | Cl1 | 83.50(6)  |
| C28 | C29 | C30 | 120.0(3) | N6 | U1 | Cl2 | 83.80(6)  |
| C29 | C30 | C25 | 119.3(3) | N6 | U1 | N4  | 46.50(7)  |
| C32 | C31 | C36 | 119.8(3) | O1 | U1 | Cl1 | 99.98(7)  |
| C32 | C31 | P2  | 119.4(2) | O1 | U1 | Cl2 | 90.53(7)  |
| C36 | C31 | P2  | 120.8(2) | O1 | U1 | N1  | 67.28(8)  |
| C33 | C32 | C31 | 119.5(3) | O1 | U1 | N3  | 114.31(8) |
| C32 | C33 | C34 | 120.6(3) | O1 | U1 | N4  | 142.12(8) |
| C35 | C34 | C33 | 120.3(3) | O1 | U1 | N6  | 168.75(8) |
| C34 | C35 | C36 | 120.0(3) | O1 | U1 | O2  | 79.67(8)  |
| C35 | C36 | C31 | 119.8(3) | O2 | U1 | Cl1 | 93.38(6)  |
| C38 | C37 | C42 | 120.4(3) | O2 | U1 | Cl2 | 101.59(6) |
| C38 | C37 | P2  | 117.6(2) | O2 | U1 | N1  | 146.29(7) |
| C42 | C37 | P2  | 122.0(2) | O2 | U1 | N3  | 164.73(8) |
| C39 | C38 | C37 | 119.7(3) | O2 | U1 | N4  | 66.18(7)  |
| C40 | C39 | C38 | 119.8(3) | O2 | U1 | N6  | 110.94(7) |

**Table S18.** Torsion Angles for Complex 1.

| A  | B  | C  | D   | Angle/°   | A   | B   | C   | D   | Angle/°   |
|----|----|----|-----|-----------|-----|-----|-----|-----|-----------|
| C1 | C2 | C3 | C4  | -0.5(5)   | C30 | C25 | P1  | C13 | 143.2(3)  |
| C1 | C6 | N6 | N5  | 173.9(3)  | C30 | C25 | P1  | C19 | -96.8(3)  |
| C1 | C6 | N6 | U1  | -3.4(4)   | C30 | C25 | P1  | N1  | 27.3(3)   |
| C2 | C1 | C6 | C5  | -1.0(4)   | C31 | C32 | C33 | C34 | 0.7(5)    |
| C2 | C1 | C6 | N6  | 178.6(3)  | C32 | C31 | C36 | C35 | 0.3(4)    |
| C2 | C1 | N3 | N2  | 1.4(5)    | C32 | C31 | P2  | C8  | -154.8(2) |
| C2 | C1 | N3 | U1  | -173.6(2) | C32 | C31 | P2  | C37 | 85.4(3)   |
| C2 | C3 | C4 | C5  | 0.0(6)    | C32 | C31 | P2  | N4  | -38.9(3)  |
| C3 | C4 | C5 | C6  | 0.0(5)    | C32 | C33 | C34 | C35 | 0.3(5)    |
| C4 | C5 | C6 | C1  | 0.5(5)    | C33 | C34 | C35 | C36 | -0.9(5)   |
| C4 | C5 | C6 | N6  | -179.1(3) | C34 | C35 | C36 | C31 | 0.6(5)    |
| C5 | C6 | N6 | N5  | -6.4(5)   | C36 | C31 | C32 | C33 | -1.0(5)   |
| C5 | C6 | N6 | U1  | 176.3(2)  | C36 | C31 | P2  | C8  | 24.0(3)   |
| C6 | C1 | C2 | C3  | 1.0(5)    | C36 | C31 | P2  | C37 | -95.9(3)  |
| C6 | C1 | N3 | N2  | -177.9(3) | C36 | C31 | P2  | N4  | 139.9(2)  |
| C6 | C1 | N3 | U1  | 7.2(4)    | C37 | C38 | C39 | C40 | 0.5(5)    |
| C7 | C8 | C9 | C10 | -0.2(5)   | C38 | C37 | C42 | C41 | 0.3(5)    |
| C7 | C8 | P2 | C31 | 87.1(3)   | C38 | C37 | P2  | C8  | 86.6(3)   |
| C7 | C8 | P2 | C37 | -154.3(2) | C38 | C37 | P2  | C31 | -154.6(2) |
| C7 | C8 | P2 | N4  | -33.3(3)  | C38 | C37 | P2  | N4  | -30.2(3)  |

|     |     |     |     |           |     |     |     |     |             |
|-----|-----|-----|-----|-----------|-----|-----|-----|-----|-------------|
| C8  | C7  | C12 | C11 | 0.0(5)    | C38 | C39 | C40 | C41 | 1.0(5)      |
| C8  | C7  | O2  | U1  | 65.5(4)   | C39 | C40 | C41 | C42 | -1.9(5)     |
| C8  | C9  | C10 | C11 | -0.8(5)   | C40 | C41 | C42 | C37 | 1.2(5)      |
| C9  | C8  | P2  | C31 | -86.9(3)  | C42 | C37 | C38 | C39 | -1.2(5)     |
| C9  | C8  | P2  | C37 | 31.6(3)   | C42 | C37 | P2  | C8  | -94.0(3)    |
| C9  | C8  | P2  | N4  | 152.6(2)  | C42 | C37 | P2  | C31 | 24.7(3)     |
| C9  | C10 | C11 | C12 | 1.5(6)    | C42 | C37 | P2  | N4  | 149.2(2)    |
| C10 | C11 | C12 | C7  | -1.1(6)   | N1  | N2  | N3  | C1  | 178.9(3)    |
| C12 | C7  | C8  | C9  | 0.6(4)    | N1  | N2  | N3  | U1  | -5.1(2)     |
| C12 | C7  | C8  | P2  | -173.3(2) | N2  | N1  | P1  | C13 | 157.0(2)    |
| C12 | C7  | O2  | U1  | -115.7(3) | N2  | N1  | P1  | C19 | 37.3(3)     |
| C13 | C14 | C15 | C16 | -1.8(6)   | N2  | N1  | P1  | C25 | -85.1(3)    |
| C13 | C14 | O1  | U1  | -61.2(5)  | N3  | C1  | C2  | C3  | -178.2(3)   |
| C14 | C13 | C18 | C17 | -0.2(5)   | N3  | C1  | C6  | C5  | 178.3(3)    |
| C14 | C13 | P1  | C19 | 155.5(2)  | N3  | C1  | C6  | N6  | -2.0(3)     |
| C14 | C13 | P1  | C25 | -85.1(3)  | N4  | N5  | N6  | C6  | -176.5(2)   |
| C14 | C13 | P1  | N1  | 34.4(3)   | N4  | N5  | N6  | U1  | 1.3(2)      |
| C14 | C15 | C16 | C17 | 0.8(7)    | N5  | N4  | P2  | C8  | -169.6(2)   |
| C15 | C14 | O1  | U1  | 118.5(4)  | N5  | N4  | P2  | C31 | 72.5(2)     |
| C15 | C16 | C17 | C18 | 0.5(6)    | N5  | N4  | P2  | C37 | -49.7(3)    |
| C16 | C17 | C18 | C13 | -0.8(5)   | O1  | C14 | C15 | C16 | 178.5(4)    |
| C18 | C13 | C14 | C15 | 1.4(5)    | O2  | C7  | C8  | C9  | 179.5(3)    |
| C18 | C13 | C14 | O1  | -178.8(3) | O2  | C7  | C8  | P2  | 5.5(4)      |
| C18 | C13 | P1  | C19 | -27.6(3)  | O2  | C7  | C12 | C11 | -178.9(3)   |
| C18 | C13 | P1  | C25 | 91.8(3)   | P1  | C13 | C14 | C15 | 178.4(3)    |
| C18 | C13 | P1  | N1  | -148.7(2) | P1  | C13 | C14 | O1  | -1.9(4)     |
| C19 | C20 | C21 | C22 | 0.3(5)    | P1  | C13 | C18 | C17 | -177.1(3)   |
| C20 | C19 | C24 | C23 | -0.2(5)   | P1  | C19 | C20 | C21 | -175.6(3)   |
| C20 | C19 | P1  | C13 | -50.8(3)  | P1  | C19 | C24 | C23 | 174.9(3)    |
| C20 | C19 | P1  | C25 | -170.2(2) | P1  | C25 | C26 | C27 | 178.9(3)    |
| C20 | C19 | P1  | N1  | 66.3(3)   | P1  | C25 | C30 | C29 | -179.0(3)   |
| C20 | C21 | C22 | C23 | 0.3(6)    | P1  | N1  | N2  | N3  | 175.2(2)    |
| C21 | C22 | C23 | C24 | -0.9(6)   | P2  | C8  | C9  | C10 | 173.8(3)    |
| C22 | C23 | C24 | C19 | 0.8(6)    | P2  | C31 | C32 | C33 | 177.8(3)    |
| C24 | C19 | C20 | C21 | -0.3(5)   | P2  | C31 | C36 | C35 | -178.5(2)   |
| C24 | C19 | P1  | C13 | 134.0(3)  | P2  | C37 | C38 | C39 | 178.1(3)    |
| C24 | C19 | P1  | C25 | 14.6(3)   | P2  | C37 | C42 | C41 | -179.0(2)   |
| C24 | C19 | P1  | N1  | -108.9(3) | P2  | N4  | N5  | N6  | -173.7(2)   |
| C25 | C26 | C27 | C28 | 0.3(5)    | U1  | N1  | N2  | N3  | 5.0(2)      |
| C26 | C25 | C30 | C29 | 0.3(5)    | U1  | N1  | P1  | C13 | -36.6(2)    |
| C26 | C25 | P1  | C13 | -36.1(3)  | U1  | N1  | P1  | C19 | -156.30(18) |
| C26 | C25 | P1  | C19 | 83.9(3)   | U1  | N1  | P1  | C25 | 81.4(2)     |
| C26 | C25 | P1  | N1  | -152.0(2) | U1  | N4  | N5  | N6  | -1.3(2)     |
| C26 | C27 | C28 | C29 | 0.1(5)    | U1  | N4  | P2  | C8  | 21.2(2)     |

|     |     |     |     |         |    |    |    |     |            |
|-----|-----|-----|-----|---------|----|----|----|-----|------------|
| C27 | C28 | C29 | C30 | -0.3(5) | U1 | N4 | P2 | C31 | -96.8(2)   |
| C28 | C29 | C30 | C25 | 0.1(5)  | U1 | N4 | P2 | C37 | 141.09(18) |
| C30 | C25 | C26 | C27 | -0.4(5) |    |    |    |     |            |

**Table S19.** Hydrogen Atom Coordinates ( $\text{\AA}\times 10^4$ ) and Isotropic Displacement Parameters ( $\text{\AA}^2\times 10^3$ ) for Complex 1.

| Atom | x     | y     | z     | U(eq) |
|------|-------|-------|-------|-------|
| H2   | 4262  | 3077  | -134  | 28    |
| H3   | 2559  | 3916  | -409  | 32    |
| H4   | 2109  | 5476  | 438   | 33    |
| H5   | 3335  | 6243  | 1573  | 28    |
| H9   | 8718  | 8952  | 4922  | 27    |
| H10  | 10636 | 8848  | 5534  | 35    |
| H11  | 11260 | 7016  | 5276  | 36    |
| H12  | 10051 | 5337  | 4385  | 29    |
| H15  | 11228 | 4292  | 3126  | 46    |
| H16  | 13016 | 3852  | 2688  | 45    |
| H17  | 12847 | 2645  | 1529  | 36    |
| H18  | 10840 | 1898  | 803   | 30    |
| H20  | 9562  | 3415  | 175   | 35    |
| H21  | 9703  | 3185  | -1026 | 45    |
| H22  | 8645  | 1362  | -1863 | 50    |
| H23  | 7419  | -241  | -1515 | 48    |
| H24  | 7288  | -41   | -303  | 37    |
| H26  | 9195  | 12    | 1295  | 33    |
| H27  | 8276  | -1823 | 1541  | 41    |
| H28  | 6087  | -2393 | 1549  | 39    |
| H29  | 4776  | -1150 | 1311  | 42    |
| H30  | 5675  | 701   | 1067  | 33    |
| H32  | 3949  | 6264  | 3614  | 29    |
| H33  | 2431  | 5583  | 4287  | 38    |
| H34  | 3041  | 5726  | 5482  | 37    |
| H35  | 5175  | 6566  | 6020  | 34    |
| H36  | 6725  | 7222  | 5353  | 27    |
| H38  | 7407  | 8666  | 2920  | 29    |
| H39  | 7410  | 10632 | 2835  | 34    |
| H40  | 6729  | 11956 | 3723  | 30    |
| H41  | 6109  | 11356 | 4712  | 29    |
| H42  | 6049  | 9376  | 4791  | 27    |



**Table S20.** Fractional Atomic Coordinates ( $\times 10^4$ ) and Equivalent Isotropic Displacement Parameters ( $\text{\AA}^2 \times 10^3$ ) for Complex **2**.  $U_{\text{eq}}$  is defined as 1/3 of the trace of the orthogonalised  $U_{\text{ij}}$  tensor.

| Atom | <i>x</i>   | <i>y</i>  | <i>z</i>   | <b>U(eq)</b> |
|------|------------|-----------|------------|--------------|
| U1   | 4396.5(2)  | 2269.4(2) | 4681.1(3)  | 18.69(10)    |
| C100 | 4021.8(15) | 3169(3)   | 3258.7(18) | 39.9(7)      |
| C11  | 4590.7(12) | 1632(2)   | 6263.5(16) | 27.4(5)      |
| P1   | 2929.1(10) | 532(2)    | 4532.9(15) | 18.7(6)      |
| P2   | 5270.3(12) | 4859(2)   | 5467.3(17) | 20.9(5)      |
| O1   | 5422(3)    | 2638(6)   | 4470(4)    | 24.8(18)     |
| O2   | 4351(3)    | 577(6)    | 4120(5)    | 21.9(15)     |
| N1   | 3246(4)    | 1646(7)   | 4954(5)    | 18.5(17)     |
| N2   | 4602(4)    | 4257(7)   | 5155(6)    | 23.9(18)     |
| N3   | 4075(4)    | 4360(7)   | 5664(5)    | 22.6(18)     |
| N4   | 3686(4)    | 3616(7)   | 5380(5)    | 22.7(17)     |
| C1   | 2899(5)    | 2223(8)   | 5591(7)    | 22(2)        |
| C01B | 2828(5)    | 3994(10)  | 6447(7)    | 28(2)        |
| C2   | 2375(5)    | 1823(10)  | 6060(6)    | 24(2)        |
| C3   | 2090(5)    | 2461(10)  | 6688(8)    | 29(2)        |
| C4   | 2301(5)    | 3544(9)   | 6880(7)    | 28(2)        |
| C5   | 3124(5)    | 3316(9)   | 5817(7)    | 24(2)        |
| C6   | 2986(4)    | -675(9)   | 5228(7)    | 24(2)        |
| C7   | 2774(5)    | -1762(10) | 4960(7)    | 30(2)        |
| C8   | 2865(6)    | -2690(10) | 5489(9)    | 36(3)        |
| C9   | 3178(6)    | -2559(10) | 6255(9)    | 36(3)        |
| C10  | 3389(5)    | -1493(10) | 6517(8)    | 33(3)        |
| C11  | 3290(5)    | -566(10)  | 6001(7)    | 24(2)        |
| C12  | 2111(4)    | 785(9)    | 4218(7)    | 22(2)        |
| C13  | 2025(5)    | 1728(9)   | 3674(7)    | 26(2)        |
| C14  | 1424(5)    | 1956(11)  | 3350(8)    | 35(3)        |
| C15  | 908(5)     | 1287(12)  | 3547(9)    | 42(3)        |
| C16  | 987(5)     | 371(12)   | 4092(9)    | 43(3)        |
| C17  | 1583(5)    | 113(10)   | 4425(7)    | 28(2)        |
| C18  | 3310(4)    | 131(9)    | 3557(6)    | 16.9(18)     |
| C19  | 3993(4)    | 144(8)    | 3499(7)    | 20(2)        |
| C20  | 4275(5)    | -264(9)   | 2760(7)    | 23(2)        |
| C21  | 3904(5)    | -712(9)   | 2111(7)    | 25(2)        |
| C22  | 3249(5)    | -722(9)   | 2181(7)    | 27(2)        |
| C23  | 2961(5)    | -312(9)   | 2893(7)    | 23(2)        |
| C24  | 5573(5)    | 4325(10)  | 6456(7)    | 27(2)        |
| C25  | 5171(5)    | 4314(12)  | 7147(8)    | 38(3)        |
| C26  | 5387(7)    | 3878(15)  | 7908(9)    | 51(4)        |
| C27  | 6021(6)    | 3488(11)  | 7988(9)    | 40(3)        |
| C28  | 6409(6)    | 3541(11)  | 7306(8)    | 35(3)        |

|     |         |          |          |          |
|-----|---------|----------|----------|----------|
| C29 | 6196(5) | 3954(9)  | 6526(7)  | 28(2)    |
| C30 | 5160(5) | 6340(10) | 5567(7)  | 27(2)    |
| C31 | 4696(6) | 6876(10) | 5057(7)  | 31(2)    |
| C32 | 4614(6) | 8022(11) | 5101(8)  | 35(3)    |
| C33 | 4978(6) | 8632(10) | 5666(9)  | 38(3)    |
| C34 | 5421(7) | 8117(12) | 6170(11) | 50(4)    |
| C35 | 5512(6) | 6982(11) | 6125(10) | 42(3)    |
| C36 | 5847(4) | 4512(8)  | 4658(10) | 26.5(18) |
| C37 | 6317(5) | 5305(10) | 4476(7)  | 35(3)    |
| C38 | 6823(6) | 5042(11) | 3926(9)  | 43(3)    |
| C39 | 6822(6) | 3956(11) | 3550(8)  | 38(3)    |
| C40 | 6361(5) | 3187(10) | 3740(7)  | 30(2)    |
| C41 | 5848(5) | 3421(9)  | 4300(7)  | 25(2)    |

**Table S21.** Anisotropic Displacement Parameters ( $\text{\AA}^2 \times 10^3$ ) for Complex **2**. The Anisotropic displacement factor exponent takes the form:  $-2\pi^2[h^2a^{*2}U_{11}+2hka^*b^*U_{12}+\dots]$ .

| Atom | $U_{11}$  | $U_{22}$  | $U_{33}$  | $U_{23}$ | $U_{13}$  | $U_{12}$  |
|------|-----------|-----------|-----------|----------|-----------|-----------|
| U1   | 18.13(14) | 15.78(17) | 22.15(15) | -2.4(2)  | -1.85(19) | -0.18(10) |
| Cl00 | 54.9(16)  | 34.6(16)  | 30.2(14)  | 6.6(12)  | -15.5(12) | -12.0(14) |
| Cl1  | 31.9(11)  | 22.4(13)  | 28.0(12)  | -2.7(10) | -5.7(9)   | 3.2(10)   |
| P1   | 18.1(9)   | 15.4(12)  | 22.5(17)  | -0.5(9)  | 1.4(8)    | -1.7(8)   |
| P2   | 22.7(11)  | 14.8(12)  | 25.1(12)  | -1.4(10) | -2.0(9)   | -1.1(10)  |
| O1   | 13(3)     | 27(4)     | 35(5)     | -4(3)    | 3(2)      | -7(3)     |
| O2   | 14(3)     | 18(4)     | 33(4)     | -2(3)    | -2(3)     | 8(3)      |
| N1   | 24(4)     | 14(4)     | 18(4)     | -1(3)    | -1(3)     | 2(3)      |
| N2   | 25(4)     | 17(5)     | 30(5)     | -5(4)    | -7(3)     | -9(3)     |
| N3   | 22(4)     | 16(4)     | 29(5)     | 4(4)     | -6(3)     | -4(3)     |
| N4   | 25(4)     | 17(4)     | 26(4)     | 2(3)     | 3(3)      | 2(3)      |
| C1   | 18(4)     | 19(6)     | 28(5)     | -4(4)    | -8(4)     | 4(4)      |
| C01B | 26(5)     | 20(6)     | 37(6)     | -12(5)   | -1(4)     | 3(4)      |
| C2   | 28(5)     | 22(6)     | 24(5)     | 1(4)     | -1(4)     | 4(4)      |
| C3   | 26(5)     | 26(6)     | 36(6)     | 3(5)     | 2(4)      | 3(4)      |
| C4   | 29(5)     | 24(6)     | 31(6)     | -5(5)    | 1(4)      | 6(4)      |
| C5   | 19(5)     | 20(6)     | 33(6)     | -2(4)    | -1(4)     | 2(4)      |
| C6   | 16(4)     | 26(6)     | 31(6)     | 4(4)     | 5(4)      | 0(4)      |
| C7   | 33(5)     | 29(6)     | 27(6)     | 1(4)     | 6(4)      | -3(5)     |
| C8   | 43(7)     | 16(6)     | 48(8)     | 7(5)     | 9(5)      | -1(5)     |
| C9   | 43(7)     | 19(6)     | 47(7)     | 9(5)     | 10(6)     | 1(5)      |
| C10  | 32(6)     | 32(7)     | 34(6)     | 8(5)     | 3(4)      | 4(5)      |
| C11  | 27(5)     | 18(6)     | 26(5)     | 1(4)     | 6(4)      | 2(4)      |
| C12  | 21(4)     | 18(5)     | 28(5)     | -8(4)    | 2(4)      | 0(4)      |
| C13  | 23(5)     | 20(6)     | 34(6)     | 1(5)     | -4(4)     | 3(4)      |
| C14  | 28(5)     | 29(6)     | 47(7)     | -1(5)    | -9(5)     | 3(5)      |

|     |       |        |        |        |        |        |
|-----|-------|--------|--------|--------|--------|--------|
| C15 | 23(5) | 47(8)  | 56(8)  | -16(6) | -7(5)  | 6(5)   |
| C16 | 24(5) | 44(8)  | 62(9)  | -14(7) | 3(5)   | -12(5) |
| C17 | 23(4) | 21(6)  | 39(6)  | -2(4)  | 2(4)   | -5(4)  |
| C18 | 12(4) | 15(5)  | 24(5)  | -2(4)  | -1(3)  | -4(4)  |
| C19 | 23(5) | 8(5)   | 30(5)  | 1(4)   | -1(4)  | -2(4)  |
| C20 | 22(4) | 18(6)  | 29(5)  | 1(4)   | 7(4)   | -1(4)  |
| C21 | 31(5) | 17(5)  | 27(6)  | -2(4)  | 3(4)   | 5(4)   |
| C22 | 31(5) | 26(6)  | 24(5)  | -2(4)  | -5(4)  | -1(5)  |
| C23 | 24(5) | 14(5)  | 31(6)  | -1(4)  | 3(4)   | 3(4)   |
| C24 | 30(5) | 23(6)  | 28(6)  | -1(4)  | -2(4)  | -2(4)  |
| C25 | 30(5) | 54(8)  | 30(6)  | -7(5)  | -6(4)  | 12(5)  |
| C26 | 49(7) | 73(11) | 31(7)  | -1(6)  | 1(5)   | 13(7)  |
| C27 | 49(7) | 31(7)  | 40(7)  | -2(5)  | -9(5)  | 8(5)   |
| C28 | 33(6) | 31(7)  | 42(7)  | -3(5)  | -9(5)  | 4(5)   |
| C29 | 28(5) | 22(6)  | 33(6)  | -2(4)  | -4(4)  | 3(4)   |
| C30 | 18(5) | 28(6)  | 35(6)  | -3(5)  | -3(4)  | -1(4)  |
| C31 | 41(6) | 21(6)  | 29(5)  | -1(5)  | -1(4)  | 7(5)   |
| C32 | 34(6) | 32(7)  | 40(6)  | 7(5)   | 1(5)   | 9(5)   |
| C33 | 31(6) | 17(6)  | 68(9)  | -5(6)  | 5(5)   | 0(5)   |
| C34 | 51(7) | 26(7)  | 72(10) | -21(7) | -21(7) | -2(6)  |
| C35 | 46(7) | 21(6)  | 59(9)  | -6(6)  | -21(6) | -5(5)  |
| C36 | 28(4) | 22(5)  | 30(5)  | -4(6)  | -2(6)  | -2(3)  |
| C37 | 39(5) | 25(6)  | 43(8)  | 0(5)   | 7(5)   | 2(5)   |
| C38 | 42(6) | 29(7)  | 57(9)  | 1(6)   | 17(6)  | -10(6) |
| C39 | 36(6) | 42(8)  | 34(6)  | -8(5)  | 13(5)  | -3(5)  |
| C40 | 40(6) | 19(6)  | 32(6)  | -3(5)  | 1(5)   | 2(5)   |
| C41 | 26(5) | 22(6)  | 27(5)  | 3(4)   | -6(4)  | 7(4)   |

**Table S22.** Bond Lengths for Complex 2.

| Atom | Atom | Length/Å  | Atom | Atom | Length/Å  |
|------|------|-----------|------|------|-----------|
| U1   | Cl00 | 2.604(3)  | C9   | C10  | 1.398(18) |
| U1   | Cl1  | 2.640(3)  | C10  | C11  | 1.382(16) |
| U1   | O1   | 2.205(6)  | C12  | C13  | 1.420(16) |
| U1   | O2   | 2.193(7)  | C12  | C17  | 1.396(14) |
| U1   | N1   | 2.545(8)  | C13  | C14  | 1.379(15) |
| U1   | N2   | 2.506(8)  | C14  | C15  | 1.370(19) |
| U1   | N3   | 2.997(9)  | C15  | C16  | 1.39(2)   |
| U1   | N4   | 2.439(8)  | C16  | C17  | 1.381(17) |
| P1   | N1   | 1.617(8)  | C18  | C19  | 1.425(12) |
| P1   | C6   | 1.806(11) | C18  | C23  | 1.379(15) |
| P1   | C12  | 1.800(10) | C19  | C20  | 1.393(15) |
| P1   | C18  | 1.796(10) | C20  | C21  | 1.387(15) |
| P2   | N2   | 1.640(8)  | C21  | C22  | 1.369(15) |

|      |     |           |     |     |           |
|------|-----|-----------|-----|-----|-----------|
| P2   | C24 | 1.798(11) | C22 | C23 | 1.364(15) |
| P2   | C30 | 1.776(12) | C24 | C25 | 1.374(17) |
| P2   | C36 | 1.800(13) | C24 | C29 | 1.375(15) |
| O1   | C41 | 1.312(13) | C25 | C26 | 1.383(19) |
| O2   | C19 | 1.333(12) | C26 | C27 | 1.403(19) |
| N1   | C1  | 1.414(13) | C27 | C28 | 1.348(19) |
| N2   | N3  | 1.365(13) | C28 | C29 | 1.396(17) |
| N3   | N4  | 1.277(12) | C30 | C31 | 1.409(16) |
| N4   | C5  | 1.405(13) | C30 | C35 | 1.375(17) |
| C1   | C2  | 1.400(15) | C31 | C32 | 1.369(17) |
| C1   | C5  | 1.421(15) | C32 | C33 | 1.375(19) |
| C01B | C4  | 1.398(16) | C33 | C34 | 1.36(2)   |
| C01B | C5  | 1.419(15) | C34 | C35 | 1.360(19) |
| C2   | C3  | 1.381(16) | C36 | C37 | 1.386(15) |
| C3   | C4  | 1.390(17) | C36 | C41 | 1.410(15) |
| C6   | C7  | 1.426(16) | C37 | C38 | 1.400(17) |
| C6   | C11 | 1.380(16) | C38 | C39 | 1.416(18) |
| C7   | C8  | 1.392(17) | C39 | C40 | 1.358(17) |
| C8   | C9  | 1.38(2)   | C40 | C41 | 1.412(16) |

**Table S23.** Bond Angles for Complex 2.

| Atom | Atom | Atom | Angle/°   | Atom | Atom | Atom | Angle/°   |
|------|------|------|-----------|------|------|------|-----------|
| Cl00 | U1   | C11  | 168.02(9) | C3   | C2   | C1   | 121.9(11) |
| Cl00 | U1   | N3   | 92.36(17) | C2   | C3   | C4   | 121.7(11) |
| C11  | U1   | N3   | 77.36(17) | C3   | C4   | C01B | 119.6(10) |
| O1   | U1   | Cl00 | 94.5(2)   | N4   | C5   | C1   | 112.5(9)  |
| O1   | U1   | C11  | 92.92(19) | N4   | C5   | C01B | 124.2(10) |
| O1   | U1   | N1   | 174.4(3)  | C01B | C5   | C1   | 123.2(10) |
| O1   | U1   | N2   | 72.2(3)   | C7   | C6   | P1   | 120.9(8)  |
| O1   | U1   | N3   | 97.5(2)   | C11  | C6   | P1   | 119.6(9)  |
| O1   | U1   | N4   | 121.7(3)  | C11  | C6   | C7   | 119.3(10) |
| O2   | U1   | Cl00 | 90.7(2)   | C8   | C7   | C6   | 119.5(11) |
| O2   | U1   | C11  | 97.3(2)   | C9   | C8   | C7   | 120.0(12) |
| O2   | U1   | O1   | 99.3(2)   | C8   | C9   | C10  | 120.5(12) |
| O2   | U1   | N1   | 76.2(2)   | C11  | C10  | C9   | 119.7(12) |
| O2   | U1   | N2   | 170.4(3)  | C6   | C11  | C10  | 121.0(11) |
| O2   | U1   | N3   | 162.6(2)  | C13  | C12  | P1   | 114.6(7)  |
| O2   | U1   | N4   | 138.9(2)  | C17  | C12  | P1   | 125.9(9)  |
| N1   | U1   | Cl00 | 88.98(18) | C17  | C12  | C13  | 119.4(9)  |
| N1   | U1   | C11  | 84.34(17) | C14  | C13  | C12  | 119.5(10) |
| N1   | U1   | N3   | 86.7(2)   | C15  | C14  | C13  | 121.0(12) |
| N2   | U1   | Cl00 | 85.7(2)   | C14  | C15  | C16  | 119.8(11) |
| N2   | U1   | C11  | 87.7(2)   | C17  | C16  | C15  | 120.8(11) |

|     |      |      |           |     |     |     |           |
|-----|------|------|-----------|-----|-----|-----|-----------|
| N2  | U1   | N1   | 112.5(3)  | C16 | C17 | C12 | 119.5(11) |
| N2  | U1   | N3   | 26.9(3)   | C19 | C18 | P1  | 119.5(7)  |
| N4  | U1   | C100 | 86.6(2)   | C23 | C18 | P1  | 121.3(7)  |
| N4  | U1   | C11  | 81.5(2)   | C23 | C18 | C19 | 118.8(9)  |
| N4  | U1   | N1   | 62.7(3)   | O2  | C19 | C18 | 121.0(9)  |
| N4  | U1   | N2   | 49.8(3)   | O2  | C19 | C20 | 120.9(8)  |
| N4  | U1   | N3   | 24.5(3)   | C20 | C19 | C18 | 118.1(9)  |
| N1  | P1   | C6   | 111.7(4)  | C21 | C20 | C19 | 121.1(9)  |
| N1  | P1   | C12  | 111.3(4)  | C22 | C21 | C20 | 119.9(10) |
| N1  | P1   | C18  | 112.8(4)  | C23 | C22 | C21 | 120.2(10) |
| C12 | P1   | C6   | 111.2(5)  | C22 | C23 | C18 | 122.0(9)  |
| C18 | P1   | C6   | 106.4(5)  | C25 | C24 | P2  | 118.6(8)  |
| C18 | P1   | C12  | 103.1(4)  | C25 | C24 | C29 | 120.6(11) |
| N2  | P2   | C24  | 113.9(5)  | C29 | C24 | P2  | 120.9(9)  |
| N2  | P2   | C30  | 110.2(5)  | C24 | C25 | C26 | 119.6(11) |
| N2  | P2   | C36  | 104.7(5)  | C25 | C26 | C27 | 120.5(13) |
| C24 | P2   | C36  | 107.5(5)  | C28 | C27 | C26 | 118.5(12) |
| C30 | P2   | C24  | 108.4(5)  | C27 | C28 | C29 | 121.9(11) |
| C30 | P2   | C36  | 112.0(5)  | C24 | C29 | C28 | 118.9(11) |
| C41 | O1   | U1   | 145.8(6)  | C31 | C30 | P2  | 118.9(9)  |
| C19 | O2   | U1   | 132.3(6)  | C35 | C30 | P2  | 122.2(9)  |
| P1  | N1   | U1   | 123.4(4)  | C35 | C30 | C31 | 118.9(11) |
| C1  | N1   | U1   | 117.4(6)  | C32 | C31 | C30 | 120.1(11) |
| C1  | N1   | P1   | 118.6(7)  | C31 | C32 | C33 | 119.1(11) |
| P2  | N2   | U1   | 130.0(5)  | C34 | C33 | C32 | 121.1(11) |
| N3  | N2   | U1   | 97.0(5)   | C35 | C34 | C33 | 120.4(12) |
| N3  | N2   | P2   | 117.8(7)  | C34 | C35 | C30 | 120.4(12) |
| N2  | N3   | U1   | 56.1(5)   | C37 | C36 | P2  | 117.6(8)  |
| N4  | N3   | U1   | 52.4(5)   | C37 | C36 | C41 | 122.4(11) |
| N4  | N3   | N2   | 103.9(8)  | C41 | C36 | P2  | 119.7(8)  |
| N3  | N4   | U1   | 103.0(6)  | C36 | C37 | C38 | 120.6(11) |
| N3  | N4   | C5   | 122.0(9)  | C37 | C38 | C39 | 117.5(11) |
| C5  | N4   | U1   | 124.2(7)  | C40 | C39 | C38 | 121.1(11) |
| N1  | C1   | C5   | 116.8(9)  | C39 | C40 | C41 | 122.8(11) |
| C2  | C1   | N1   | 127.5(9)  | O1  | C41 | C36 | 124.3(10) |
| C2  | C1   | C5   | 115.6(10) | O1  | C41 | C40 | 120.1(10) |
| C4  | C01B | C5   | 117.9(10) | C36 | C41 | C40 | 115.6(10) |

**Table S24.** Hydrogen Atom Coordinates ( $\text{\AA}\times 10^4$ ) and Isotropic Displacement Parameters ( $\text{\AA}^2\times 10^3$ ) for Complex 2.

| Atom | <i>x</i> | <i>y</i> | <i>z</i> | U(eq) |
|------|----------|----------|----------|-------|
| H01B | 2980.03  | 4714.91  | 6568.15  | 34    |
| H2   | 2214.99  | 1106.3   | 5944.74  | 29    |

|     |         |          |         |    |
|-----|---------|----------|---------|----|
| H3  | 1747.56 | 2158.52  | 6990.09 | 35 |
| H4  | 2093.87 | 3967.3   | 7294.64 | 34 |
| H7  | 2575.53 | -1851.18 | 4436    | 36 |
| H8  | 2715.15 | -3397.53 | 5326.26 | 43 |
| H9  | 3249.46 | -3184.1  | 6599.18 | 44 |
| H10 | 3594.58 | -1408.69 | 7036.49 | 40 |
| H11 | 3429.52 | 141.32   | 6177.75 | 28 |
| H13 | 2371.93 | 2187.76  | 3536.2  | 31 |
| H14 | 1367.59 | 2573.49  | 2993.83 | 42 |
| H15 | 506.9   | 1443.1   | 3316.77 | 50 |
| H16 | 634.33  | -72.35   | 4233.88 | 52 |
| H17 | 1632.02 | -503.97  | 4784.06 | 33 |
| H20 | 4718.81 | -235.27  | 2699.57 | 28 |
| H21 | 4100.67 | -1005.78 | 1629.55 | 30 |
| H22 | 3000.36 | -1009.52 | 1741.87 | 32 |
| H23 | 2515.54 | -331.36  | 2932.13 | 28 |
| H25 | 4755.72 | 4597.63  | 7102.43 | 46 |
| H26 | 5111.27 | 3842.7   | 8370.51 | 61 |
| H27 | 6169.29 | 3200.34  | 8499.94 | 48 |
| H28 | 6831.7  | 3294.52  | 7356.08 | 42 |
| H29 | 6470.97 | 3977.06  | 6062.15 | 33 |
| H31 | 4444.54 | 6450.56  | 4688.43 | 37 |
| H32 | 4316.9  | 8382.1   | 4754.56 | 43 |
| H33 | 4919.88 | 9409.03  | 5704.99 | 46 |
| H34 | 5663.46 | 8545.35  | 6547.33 | 60 |
| H35 | 5814.99 | 6637.43  | 6472.76 | 50 |
| H37 | 6295.73 | 6017.72  | 4721.6  | 43 |
| H38 | 7146.73 | 5560.6   | 3812.38 | 51 |
| H39 | 7143.95 | 3766.93  | 3166.88 | 45 |
| H40 | 6382.67 | 2476.19  | 3491.37 | 36 |

**Table S25.** Fractional Atomic Coordinates ( $\times 10^4$ ) and Equivalent Isotropic Displacement Parameters ( $\text{\AA}^2 \times 10^3$ ) for Complex **4**.  $U_{\text{eq}}$  is defined as 1/3 of the trace of the orthogonalised  $U_{\text{ij}}$  tensor.

| Atom | x       | y          | z          | $U(\text{eq})$ |
|------|---------|------------|------------|----------------|
| C1   | 6715(2) | 4628.2(18) | 4813.3(16) | 14.6(6)        |
| C2   | 6082(3) | 4254(2)    | 5207.3(18) | 19.4(7)        |
| C3   | 5793(3) | 4598(2)    | 5767.3(17) | 20.5(7)        |
| C4   | 6143(3) | 5325(2)    | 5943.2(17) | 19.7(7)        |
| C5   | 6769(3) | 5702.4(19) | 5555.4(19) | 21.1(7)        |
| C6   | 7046(3) | 5362.7(18) | 4981.4(16) | 16.1(6)        |
| C7   | 7535(3) | 1868.7(19) | 4220.3(16) | 16.7(6)        |
| C8   | 6998(3) | 1472(2)    | 4660.4(18) | 21.1(7)        |
| C9   | 7480(3) | 1158(2)    | 5226.9(18) | 25.6(8)        |

|     |            |            |            |           |
|-----|------------|------------|------------|-----------|
| C10 | 8476(3)    | 1236(2)    | 5348(2)    | 29.7(9)   |
| C11 | 9013(3)    | 1634(3)    | 4905(2)    | 32.8(9)   |
| C12 | 8535(3)    | 1952(2)    | 4344.6(19) | 25.3(8)   |
| C13 | 7426(2)    | 2073(2)    | 2785.1(16) | 16.3(7)   |
| C14 | 7404(2)    | 2557(2)    | 2236.1(16) | 15.4(6)   |
| C15 | 7606(3)    | 2255(2)    | 1629.3(17) | 18.0(7)   |
| C16 | 7809(3)    | 1479(2)    | 1570.9(18) | 22.0(7)   |
| C17 | 7843(3)    | 993(2)     | 2110.6(19) | 22.3(7)   |
| C18 | 7660(3)    | 1287.9(19) | 2719.8(18) | 19.7(7)   |
| C19 | 5673(3)    | 2181.2(19) | 3460.1(16) | 16.3(6)   |
| C20 | 5332(3)    | 1483(2)    | 3193(2)    | 25.0(8)   |
| C21 | 4343(3)    | 1325(2)    | 3119(2)    | 28.2(8)   |
| C22 | 3685(3)    | 1866(2)    | 3307(2)    | 24.7(8)   |
| C23 | 4013(3)    | 2557(2)    | 3565.5(19) | 25.9(8)   |
| C24 | 5007(3)    | 2721(2)    | 3646.2(18) | 20.3(7)   |
| C25 | 8574(2)    | 6059.9(19) | 3254.7(16) | 15.2(6)   |
| C26 | 8506(3)    | 6663.6(19) | 3706.3(16) | 16.1(6)   |
| C27 | 9097(3)    | 7316(2)    | 3668.8(18) | 19.7(7)   |
| C28 | 9752(3)    | 7372(2)    | 3197.3(18) | 20.8(7)   |
| C29 | 9839(2)    | 6764(2)    | 2763.9(17) | 18.1(7)   |
| C30 | 9261(3)    | 6116(2)    | 2792.9(16) | 17.0(6)   |
| C31 | 8100(2)    | 7244.7(19) | 5007.6(16) | 15.2(6)   |
| C32 | 8685(3)    | 6952(2)    | 5546.1(18) | 19.7(7)   |
| C33 | 8994(3)    | 7438(2)    | 6056.1(18) | 22.2(7)   |
| C34 | 8766(3)    | 8213(2)    | 6027.1(18) | 22.7(7)   |
| C35 | 8207(3)    | 8508(2)    | 5489.0(18) | 20.4(7)   |
| C36 | 7865(2)    | 8023.8(19) | 4978.1(16) | 16.3(6)   |
| C37 | 6524(3)    | 7015(2)    | 4036.7(18) | 19.5(7)   |
| C38 | 5798(3)    | 7129(2)    | 4470(2)    | 24.4(8)   |
| C39 | 4951(3)    | 7501(2)    | 4259(2)    | 28.0(8)   |
| C40 | 4814(3)    | 7784(3)    | 3621(2)    | 31.9(9)   |
| C41 | 5520(3)    | 7668(3)    | 3191(2)    | 40.3(11)  |
| C42 | 6373(3)    | 7279(3)    | 3396(2)    | 32.3(9)   |
| CI1 | 5551.8(6)  | 4587.5(5)  | 2786.7(4)  | 22.83(17) |
| CI2 | 7683.0(6)  | 5028.4(4)  | 1687.9(4)  | 18.97(15) |
| CI3 | 9260.6(6)  | 3820.9(5)  | 2943.4(4)  | 24.81(17) |
| N1  | 7179(2)    | 3305.5(16) | 3617.0(14) | 15.9(5)   |
| N2  | 6929(2)    | 3574.8(16) | 4204.0(14) | 15.4(5)   |
| N3  | 7036(2)    | 4298.9(15) | 4228.4(14) | 14.1(6)   |
| N4  | 7695(3)    | 5735.4(17) | 4580.6(17) | 20.3(6)   |
| O1  | 7174.1(18) | 3296.1(12) | 2282.1(11) | 15.2(4)   |
| O2  | 7998.6(18) | 5436.2(13) | 3268.8(11) | 15.4(4)   |
| P1  | 6957.4(6)  | 2380.4(4)  | 3529.1(4)  | 13.59(15) |
| P2  | 7684.6(6)  | 6630.9(5)  | 4334.4(4)  | 14.78(16) |

|     |           |           |           |          |
|-----|-----------|-----------|-----------|----------|
| U1  | 7453.2(2) | 4344.0(2) | 2825.2(2) | 11.67(5) |
| C51 | 9112(4)   | 9424(3)   | 3314(3)   | 41.1(11) |
| C52 | 8709(4)   | 9692(3)   | 3878(3)   | 44.3(12) |
| C53 | 7718(4)   | 9659(2)   | 3921(3)   | 43.1(12) |
| C54 | 7112(4)   | 9364(3)   | 3414(3)   | 41.4(12) |
| C55 | 7511(4)   | 9093(3)   | 2857(2)   | 42.8(12) |
| C56 | 8503(4)   | 9121(3)   | 2811(3)   | 40.8(11) |
| C61 | 4530(3)   | 607(2)    | 5271(2)   | 26.0(8)  |
| C62 | 4310(3)   | 417(3)    | 4620(2)   | 31.4(9)  |
| C63 | 4784(3)   | -191(3)   | 4349(2)   | 33.2(9)  |
| C71 | 9539(3)   | 4414(3)   | 5303(3)   | 35.6(10) |
| C72 | 9960(3)   | 5009(3)   | 5677(2)   | 31.3(9)  |
| C73 | 10425(3)  | 5594(3)   | 5378(2)   | 32.1(9)  |

**Table S26.** Anisotropic Displacement Parameters ( $\text{\AA}^2 \times 10^3$ ) for Complex 4. The Anisotropic displacement factor exponent takes the form:  $-2\pi^2[h^2a^{*2}U_{11}+2hka^*b^*U_{12}+\dots]$ .

| Atom | $U_{11}$ | $U_{22}$ | $U_{33}$ | $U_{23}$  | $U_{13}$ | $U_{12}$  |
|------|----------|----------|----------|-----------|----------|-----------|
| C1   | 16.6(15) | 13.3(15) | 14.0(15) | 2.4(12)   | 1.2(12)  | 0.9(12)   |
| C2   | 23.3(18) | 17.0(15) | 19.1(17) | -0.3(13)  | 8.0(14)  | -3.4(13)  |
| C3   | 23.5(17) | 20.8(17) | 18.2(16) | 2.3(14)   | 7.5(13)  | -1.4(14)  |
| C4   | 27.2(18) | 18.9(17) | 13.9(15) | -1.8(13)  | 6.9(13)  | 1.0(14)   |
| C5   | 30(2)    | 13.9(16) | 20.7(18) | -3.4(12)  | 8.5(15)  | -0.5(13)  |
| C6   | 21.4(16) | 11.6(15) | 16.0(15) | 1.2(12)   | 5.6(13)  | 0.1(12)   |
| C7   | 25.0(17) | 11.0(14) | 14.5(15) | -0.2(12)  | 4.6(13)  | 0.6(12)   |
| C8   | 28.3(18) | 14.6(15) | 21.2(17) | 2.1(13)   | 7.2(14)  | -0.4(13)  |
| C9   | 39(2)    | 20.9(17) | 17.2(17) | 5.0(14)   | 5.4(15)  | -0.4(15)  |
| C10  | 41(2)    | 28(2)    | 20.0(18) | 6.2(15)   | -1.8(16) | 6.4(17)   |
| C11  | 28(2)    | 43(2)    | 26(2)    | 5.7(18)   | -0.3(16) | 1.6(18)   |
| C12  | 27.1(19) | 26.8(19) | 22.0(18) | 6.9(15)   | 2.1(15)  | -3.9(15)  |
| C13  | 18.1(17) | 13.3(16) | 18.4(17) | -2.2(12)  | 6.1(13)  | -0.2(11)  |
| C14  | 15.3(15) | 15.7(16) | 15.3(15) | 1.3(12)   | 3.2(12)  | -0.6(12)  |
| C15  | 19.9(16) | 18.0(16) | 16.6(16) | -0.7(13)  | 3.6(13)  | -0.7(13)  |
| C16  | 22.9(17) | 22.5(18) | 21.6(17) | -9.0(14)  | 7.2(14)  | 0.7(14)   |
| C17  | 27.9(18) | 14.9(16) | 25.2(18) | -5.4(14)  | 9.1(14)  | 2.4(14)   |
| C18  | 25.1(17) | 10.7(15) | 23.7(17) | 1.6(13)   | 5.6(14)  | 0.0(13)   |
| C19  | 21.1(16) | 12.3(14) | 15.9(15) | -0.6(12)  | 3.0(12)  | -1.9(12)  |
| C20  | 24.4(19) | 17.5(17) | 34(2)    | -6.2(15)  | 7.8(15)  | 0.3(14)   |
| C21  | 25.8(19) | 18.6(17) | 41(2)    | -12.2(16) | 10.1(17) | -12.9(15) |
| C22  | 21.6(18) | 24.8(18) | 28.7(19) | -1.6(15)  | 8.1(15)  | -6.5(14)  |
| C23  | 26.8(19) | 26.0(19) | 25.9(19) | -8.0(15)  | 8.1(15)  | 1.3(15)   |
| C24  | 23.5(17) | 17.4(16) | 20.4(17) | -3.8(13)  | 3.6(13)  | -0.3(13)  |
| C25  | 16.9(15) | 14.9(15) | 13.9(15) | 3.2(12)   | 1.5(12)  | 1.1(12)   |
| C26  | 20.1(16) | 12.8(15) | 16.0(15) | -0.5(12)  | 5.2(12)  | -0.5(12)  |



|     |          |          |          |          |          |          |
|-----|----------|----------|----------|----------|----------|----------|
| C27 | 22.9(17) | 14.4(15) | 22.3(17) | -0.6(13) | 5.0(14)  | -4.0(13) |
| C28 | 21.0(17) | 17.9(16) | 23.8(17) | -0.4(14) | 4.1(14)  | -7.4(13) |
| C29 | 15.6(15) | 20.9(16) | 18.5(16) | 2.6(13)  | 4.6(12)  | -3.7(13) |
| C30 | 20.4(16) | 17.2(15) | 13.9(15) | -1.5(12) | 3.6(12)  | 0.4(13)  |
| C31 | 18.0(15) | 13.7(15) | 14.1(15) | -1.8(12) | 3.9(12)  | 0.9(12)  |
| C32 | 19.7(16) | 15.9(15) | 23.9(18) | 3.5(13)  | 4.7(13)  | 2.0(13)  |
| C33 | 18.3(16) | 27.7(19) | 20.0(17) | 3.6(14)  | -2.3(13) | 1.6(14)  |
| C34 | 25.9(18) | 24.4(18) | 17.6(17) | -7.1(14) | 0.2(14)  | -0.7(14) |
| C35 | 25.5(18) | 15.0(15) | 21.1(17) | -4.8(13) | 4.5(14)  | -0.6(13) |
| C36 | 19.0(16) | 15.5(15) | 14.2(15) | 0.0(12)  | 0.5(12)  | 1.8(12)  |
| C37 | 20.4(16) | 15.4(15) | 22.6(17) | -7.8(13) | 1.0(13)  | -3.7(13) |
| C38 | 26.5(19) | 21.7(17) | 26.1(19) | 3.9(15)  | 8.8(15)  | 1.1(14)  |
| C39 | 23.6(19) | 23.0(18) | 38(2)    | 1.9(16)  | 9.3(16)  | -1.3(15) |
| C40 | 21.4(19) | 35(2)    | 38(2)    | -4.0(18) | -3.7(16) | -1.4(16) |
| C41 | 31(2)    | 66(3)    | 22(2)    | 2(2)     | -5.9(17) | 8(2)     |
| C42 | 29(2)    | 50(3)    | 17.2(18) | -6.2(17) | -1.3(15) | 3.4(18)  |
| CI1 | 19.0(4)  | 24.0(4)  | 26.3(4)  | 6.6(3)   | 6.5(3)   | 2.8(3)   |
| CI2 | 27.0(4)  | 17.2(3)  | 13.0(3)  | 2.3(3)   | 3.5(3)   | -1.4(3)  |
| CI3 | 20.4(4)  | 25.6(4)  | 28.3(4)  | -2.4(3)  | 0.9(3)   | 4.9(3)   |
| N1  | 20.4(14) | 11.7(12) | 15.9(13) | -2.2(10) | 3.4(11)  | -0.8(10) |
| N2  | 18.4(13) | 13.8(13) | 13.9(13) | -1.5(10) | 1.5(10)  | -2.9(10) |
| N3  | 19.3(14) | 12.9(13) | 10.7(13) | -0.7(9)  | 4.0(11)  | 0.6(10)  |
| N4  | 31.3(17) | 10.8(13) | 21.1(16) | -4.9(11) | 15.7(13) | -1.5(11) |
| O1  | 23.6(12) | 8.7(10)  | 13.1(11) | -1.0(8)  | 0.1(9)   | -1.8(9)  |
| O2  | 23.3(12) | 7.6(10)  | 15.8(11) | -4.5(9)  | 5.0(9)   | -6.0(9)  |
| P1  | 19.2(4)  | 8.6(3)   | 13.3(4)  | 0.5(3)   | 3.4(3)   | -1.3(3)  |
| P2  | 18.8(4)  | 10.8(3)  | 15.2(4)  | -1.8(3)  | 4.2(3)   | -1.4(3)  |
| U1  | 15.45(7) | 8.70(7)  | 11.06(7) | 0.29(3)  | 2.26(4)  | -0.27(3) |
| C51 | 45(3)    | 34(2)    | 45(3)    | 11(2)    | 10(2)    | 10.2(19) |
| C52 | 67(3)    | 24(2)    | 41(3)    | 7.3(19)  | -1(2)    | 8(2)     |
| C53 | 72(4)    | 21(2)    | 40(3)    | 9.0(18)  | 26(2)    | 10(2)    |
| C54 | 53(3)    | 32(3)    | 41(3)    | 8.6(18)  | 18(2)    | 4.5(19)  |
| C55 | 52(3)    | 36(3)    | 42(3)    | 9(2)     | 12(2)    | 5(2)     |
| C56 | 52(3)    | 33(2)    | 39(3)    | 8(2)     | 15(2)    | 12(2)    |
| C61 | 25(2)    | 18.9(18) | 35(2)    | -1.3(14) | 6.6(17)  | -1.1(13) |
| C62 | 27(2)    | 36(2)    | 31(2)    | 8.8(18)  | 1.3(16)  | 8.5(17)  |
| C63 | 31(2)    | 43(2)    | 24.7(19) | -6.9(18) | -0.4(16) | 2.1(18)  |
| C71 | 30(2)    | 37(2)    | 41(3)    | 13.1(19) | 13.1(19) | 14.0(17) |
| C72 | 28(2)    | 47(2)    | 19.2(17) | 5.7(17)  | 2.4(15)  | 16.7(18) |
| C73 | 25(2)    | 38(2)    | 33(2)    | -1.2(17) | 1.3(17)  | 11.8(16) |

**Table S27.** Bond Lengths for Complex 4.

| Atom | Atom | Length/Å | Atom | Atom             | Length/Å  |
|------|------|----------|------|------------------|-----------|
| C1   | C2   | 1.398(5) | C31  | C36              | 1.397(5)  |
| C1   | C6   | 1.393(5) | C31  | P2               | 1.797(3)  |
| C1   | N3   | 1.430(4) | C32  | C33              | 1.382(5)  |
| C2   | C3   | 1.380(5) | C33  | C34              | 1.387(5)  |
| C3   | C4   | 1.392(5) | C34  | C35              | 1.386(5)  |
| C4   | C5   | 1.388(5) | C35  | C36              | 1.392(5)  |
| C5   | C6   | 1.396(5) | C37  | C38              | 1.406(5)  |
| C6   | N4   | 1.422(4) | C37  | C42              | 1.385(6)  |
| C7   | C8   | 1.396(5) | C37  | P2               | 1.793(4)  |
| C7   | C12  | 1.389(5) | C38  | C39              | 1.374(6)  |
| C7   | P1   | 1.797(4) | C39  | C40              | 1.391(6)  |
| C8   | C9   | 1.396(5) | C40  | C41              | 1.382(6)  |
| C9   | C10  | 1.382(6) | C41  | C42              | 1.391(6)  |
| C10  | C11  | 1.401(6) | C11  | U1               | 2.6516(8) |
| C11  | C12  | 1.386(6) | C12  | U1               | 2.6545(8) |
| C13  | C14  | 1.402(5) | C13  | U1               | 2.6463(8) |
| C13  | C18  | 1.416(5) | N1   | N2               | 1.359(4)  |
| C13  | P1   | 1.784(3) | N1   | P1               | 1.649(3)  |
| C14  | C15  | 1.397(5) | N1   | U1               | 2.479(3)  |
| C14  | O1   | 1.332(4) | N2   | N3               | 1.272(4)  |
| C15  | C16  | 1.389(5) | N3   | U1               | 2.972(3)  |
| C16  | C17  | 1.387(5) | N4   | P2               | 1.641(3)  |
| C17  | C18  | 1.389(5) | O1   | U1               | 2.155(2)  |
| C19  | C20  | 1.400(5) | O2   | U1               | 2.213(2)  |
| C19  | C24  | 1.391(5) | C51  | C52              | 1.403(8)  |
| C19  | P1   | 1.799(4) | C51  | C56              | 1.374(8)  |
| C20  | C21  | 1.387(5) | C52  | C53              | 1.377(8)  |
| C21  | C22  | 1.386(6) | C53  | C54              | 1.374(8)  |
| C22  | C23  | 1.377(5) | C54  | C55              | 1.389(7)  |
| C23  | C24  | 1.395(5) | C55  | C56              | 1.380(7)  |
| C25  | C26  | 1.408(5) | C61  | C62              | 1.377(6)  |
| C25  | C30  | 1.396(5) | C61  | C63 <sup>1</sup> | 1.378(6)  |
| C25  | O2   | 1.349(4) | C62  | C63              | 1.387(6)  |
| C26  | C27  | 1.406(5) | C63  | C61 <sup>1</sup> | 1.378(6)  |
| C26  | P2   | 1.784(3) | C71  | C72              | 1.385(7)  |
| C27  | C28  | 1.380(5) | C71  | C73 <sup>2</sup> | 1.396(7)  |
| C28  | C29  | 1.393(5) | C72  | C73              | 1.376(7)  |
| C29  | C30  | 1.387(5) | C73  | C71 <sup>2</sup> | 1.396(7)  |
| C31  | C32  | 1.403(5) |      |                  |           |

<sup>1</sup>1-X,-Y,1-Z; <sup>2</sup>2-X,1-Y,1-Z

**Table S28.** Bond Angles for Complex 4.

| Atom | Atom | Atom | Angle/°  | Atom | Atom | Atom | Angle/°    |
|------|------|------|----------|------|------|------|------------|
| C2   | C1   | N3   | 123.2(3) | C41  | C40  | C39  | 119.8(4)   |
| C6   | C1   | C2   | 119.7(3) | C40  | C41  | C42  | 120.3(4)   |
| C6   | C1   | N3   | 117.2(3) | C37  | C42  | C41  | 120.0(4)   |
| C3   | C2   | C1   | 120.9(3) | N2   | N1   | P1   | 112.0(2)   |
| C2   | C3   | C4   | 119.4(3) | N2   | N1   | U1   | 112.78(19) |
| C5   | C4   | C3   | 120.3(3) | P1   | N1   | U1   | 132.95(15) |
| C4   | C5   | C6   | 120.4(3) | N3   | N2   | N1   | 109.9(3)   |
| C1   | C6   | C5   | 119.3(3) | C1   | N3   | U1   | 153.4(2)   |
| C1   | C6   | N4   | 119.2(3) | N2   | N3   | C1   | 112.8(3)   |
| C5   | C6   | N4   | 121.4(3) | N2   | N3   | U1   | 91.15(19)  |
| C8   | C7   | P1   | 121.8(3) | C6   | N4   | P2   | 128.5(3)   |
| C12  | C7   | C8   | 120.5(3) | C14  | O1   | U1   | 145.4(2)   |
| C12  | C7   | P1   | 117.3(3) | C25  | O2   | U1   | 150.0(2)   |
| C7   | C8   | C9   | 119.2(4) | C7   | P1   | C19  | 109.44(16) |
| C10  | C9   | C8   | 120.3(4) | C13  | P1   | C7   | 110.53(16) |
| C9   | C10  | C11  | 120.4(4) | C13  | P1   | C19  | 107.56(16) |
| C12  | C11  | C10  | 119.4(4) | N1   | P1   | C7   | 109.55(15) |
| C11  | C12  | C7   | 120.2(4) | N1   | P1   | C13  | 108.02(16) |
| C14  | C13  | C18  | 119.8(3) | N1   | P1   | C19  | 111.70(15) |
| C14  | C13  | P1   | 121.0(3) | C26  | P2   | C31  | 110.51(16) |
| C18  | C13  | P1   | 118.3(3) | C26  | P2   | C37  | 110.37(17) |
| C15  | C14  | C13  | 119.3(3) | C37  | P2   | C31  | 104.68(15) |
| O1   | C14  | C13  | 121.0(3) | N4   | P2   | C26  | 105.16(16) |
| O1   | C14  | C15  | 119.7(3) | N4   | P2   | C31  | 109.81(17) |
| C16  | C15  | C14  | 120.1(3) | N4   | P2   | C37  | 116.35(17) |
| C17  | C16  | C15  | 121.3(3) | C11  | U1   | C12  | 95.42(3)   |
| C16  | C17  | C18  | 119.3(3) | C11  | U1   | N3   | 76.09(6)   |
| C17  | C18  | C13  | 120.2(3) | C12  | U1   | N3   | 154.57(5)  |
| C20  | C19  | P1   | 119.6(3) | C13  | U1   | C11  | 168.44(3)  |
| C24  | C19  | C20  | 119.2(3) | C13  | U1   | C12  | 93.00(3)   |
| C24  | C19  | P1   | 121.2(3) | C13  | U1   | N3   | 99.33(6)   |
| C21  | C20  | C19  | 120.6(3) | N1   | U1   | C11  | 86.01(7)   |
| C22  | C21  | C20  | 119.7(3) | N1   | U1   | C12  | 159.36(7)  |
| C23  | C22  | C21  | 120.0(4) | N1   | U1   | C13  | 83.33(7)   |
| C22  | C23  | C24  | 120.8(4) | N1   | U1   | N3   | 45.47(8)   |
| C19  | C24  | C23  | 119.6(3) | O1   | U1   | C11  | 89.32(7)   |
| C30  | C25  | C26  | 118.5(3) | O1   | U1   | C12  | 87.75(6)   |
| O2   | C25  | C26  | 121.1(3) | O1   | U1   | C13  | 83.09(7)   |
| O2   | C25  | C30  | 120.4(3) | O1   | U1   | N1   | 71.66(9)   |
| C25  | C26  | P2   | 122.0(3) | O1   | U1   | N3   | 115.65(8)  |
| C27  | C26  | C25  | 119.8(3) | O1   | U1   | O2   | 168.50(9)  |

|     |     |     |          |                  |     |                  |           |
|-----|-----|-----|----------|------------------|-----|------------------|-----------|
| C27 | C26 | P2  | 118.2(3) | O2               | U1  | C11              | 100.07(7) |
| C28 | C27 | C26 | 120.9(3) | O2               | U1  | C12              | 84.78(6)  |
| C27 | C28 | C29 | 119.2(3) | O2               | U1  | C13              | 88.57(7)  |
| C30 | C29 | C28 | 120.8(3) | O2               | U1  | N1               | 115.32(9) |
| C29 | C30 | C25 | 120.8(3) | O2               | U1  | N3               | 73.46(8)  |
| C32 | C31 | P2  | 120.5(3) | C56              | C51 | C52              | 118.8(5)  |
| C36 | C31 | C32 | 120.2(3) | C53              | C52 | C51              | 120.3(5)  |
| C36 | C31 | P2  | 119.3(3) | C54              | C53 | C52              | 120.7(5)  |
| C33 | C32 | C31 | 119.1(3) | C53              | C54 | C55              | 119.1(5)  |
| C32 | C33 | C34 | 120.8(3) | C56              | C55 | C54              | 120.5(5)  |
| C35 | C34 | C33 | 120.3(3) | C51              | C56 | C55              | 120.6(5)  |
| C34 | C35 | C36 | 119.9(3) | C62              | C61 | C63 <sup>1</sup> | 120.1(4)  |
| C35 | C36 | C31 | 119.7(3) | C61              | C62 | C63              | 119.8(4)  |
| C38 | C37 | P2  | 120.2(3) | C61 <sup>1</sup> | C63 | C62              | 120.1(4)  |
| C42 | C37 | C38 | 119.4(4) | C72              | C71 | C73 <sup>2</sup> | 120.5(4)  |
| C42 | C37 | P2  | 120.1(3) | C73              | C72 | C71              | 120.0(4)  |
| C39 | C38 | C37 | 120.1(4) | C72              | C73 | C71 <sup>2</sup> | 119.5(4)  |
| C38 | C39 | C40 | 120.3(4) |                  |     |                  |           |

<sup>1</sup>1-X,-Y,1-Z; <sup>2</sup>2-X,1-Y,1-Z

**Table S29.** Torsion Angles for Complex 4.

| A  | B  | C   | D   | Angle/°   | A   | B   | C   | D   | Angle/°   |
|----|----|-----|-----|-----------|-----|-----|-----|-----|-----------|
| C1 | C2 | C3  | C4  | -0.5(6)   | C28 | C29 | C30 | C25 | 0.3(5)    |
| C1 | C6 | N4  | P2  | 137.3(3)  | C30 | C25 | C26 | C27 | 2.3(5)    |
| C2 | C1 | C6  | C5  | 2.4(5)    | C30 | C25 | C26 | P2  | -177.6(3) |
| C2 | C1 | C6  | N4  | 179.5(3)  | C30 | C25 | O2  | U1  | -8.2(6)   |
| C2 | C1 | N3  | N2  | -19.0(5)  | C31 | C32 | C33 | C34 | -2.6(5)   |
| C2 | C1 | N3  | U1  | 134.0(4)  | C32 | C31 | C36 | C35 | -0.6(5)   |
| C2 | C3 | C4  | C5  | 0.6(6)    | C32 | C31 | P2  | C26 | -92.8(3)  |
| C3 | C4 | C5  | C6  | 0.8(6)    | C32 | C31 | P2  | C37 | 148.3(3)  |
| C4 | C5 | C6  | C1  | -2.3(6)   | C32 | C31 | P2  | N4  | 22.7(3)   |
| C4 | C5 | C6  | N4  | -179.3(4) | C32 | C33 | C34 | C35 | 1.2(6)    |
| C5 | C6 | N4  | P2  | -45.7(5)  | C33 | C34 | C35 | C36 | 0.6(6)    |
| C6 | C1 | C2  | C3  | -1.1(5)   | C34 | C35 | C36 | C31 | -0.9(5)   |
| C6 | C1 | N3  | N2  | 162.1(3)  | C36 | C31 | C32 | C33 | 2.3(5)    |
| C6 | C1 | N3  | U1  | -44.9(6)  | C36 | C31 | P2  | C26 | 84.8(3)   |
| C6 | N4 | P2  | C26 | -167.1(3) | C36 | C31 | P2  | C37 | -34.0(3)  |
| C6 | N4 | P2  | C31 | 73.9(4)   | C36 | C31 | P2  | N4  | -159.6(3) |
| C6 | N4 | P2  | C37 | -44.7(4)  | C37 | C38 | C39 | C40 | -1.5(6)   |
| C7 | C8 | C9  | C10 | -0.3(6)   | C38 | C37 | C42 | C41 | 1.4(6)    |
| C8 | C7 | C12 | C11 | 0.7(6)    | C38 | C37 | P2  | C26 | -172.6(3) |
| C8 | C7 | P1  | C13 | -125.8(3) | C38 | C37 | P2  | C31 | -53.7(3)  |

|     |     |     |     |           |     |     |     |                  |           |
|-----|-----|-----|-----|-----------|-----|-----|-----|------------------|-----------|
| C8  | C7  | P1  | C19 | -7.5(3)   | C38 | C37 | P2  | N4               | 67.7(3)   |
| C8  | C7  | P1  | N1  | 115.3(3)  | C38 | C39 | C40 | C41              | 2.0(7)    |
| C8  | C9  | C10 | C11 | 0.3(6)    | C39 | C40 | C41 | C42              | -0.9(7)   |
| C9  | C10 | C11 | C12 | 0.2(7)    | C40 | C41 | C42 | C37              | -0.9(8)   |
| C10 | C11 | C12 | C7  | -0.6(7)   | C42 | C37 | C38 | C39              | -0.3(6)   |
| C12 | C7  | C8  | C9  | -0.2(5)   | C42 | C37 | P2  | C26              | 0.3(4)    |
| C12 | C7  | P1  | C13 | 61.2(3)   | C42 | C37 | P2  | C31              | 119.3(3)  |
| C12 | C7  | P1  | C19 | 179.5(3)  | C42 | C37 | P2  | N4               | -119.3(3) |
| C12 | C7  | P1  | N1  | -57.7(3)  | N1  | N2  | N3  | C1               | 175.5(3)  |
| C13 | C14 | C15 | C16 | 1.2(5)    | N1  | N2  | N3  | U1               | 7.2(3)    |
| C13 | C14 | O1  | U1  | 49.6(5)   | N2  | N1  | P1  | C7               | -53.7(3)  |
| C14 | C13 | C18 | C17 | -1.7(5)   | N2  | N1  | P1  | C13              | -174.1(2) |
| C14 | C13 | P1  | C7  | -154.4(3) | N2  | N1  | P1  | C19              | 67.8(3)   |
| C14 | C13 | P1  | C19 | 86.1(3)   | N3  | C1  | C2  | C3               | -179.9(3) |
| C14 | C13 | P1  | N1  | -34.6(3)  | N3  | C1  | C6  | C5               | -178.7(3) |
| C14 | C15 | C16 | C17 | -1.9(6)   | N3  | C1  | C6  | N4               | -1.6(5)   |
| C15 | C14 | O1  | U1  | -131.8(3) | O1  | C14 | C15 | C16              | -177.4(3) |
| C15 | C16 | C17 | C18 | 0.7(6)    | O2  | C25 | C26 | C27              | -178.3(3) |
| C16 | C17 | C18 | C13 | 1.1(6)    | O2  | C25 | C26 | P2               | 1.7(5)    |
| C18 | C13 | C14 | C15 | 0.6(5)    | O2  | C25 | C30 | C29              | 178.4(3)  |
| C18 | C13 | C14 | O1  | 179.2(3)  | P1  | C7  | C8  | C9               | -172.9(3) |
| C18 | C13 | P1  | C7  | 36.7(3)   | P1  | C7  | C12 | C11              | 173.7(3)  |
| C18 | C13 | P1  | C19 | -82.8(3)  | P1  | C13 | C14 | C15              | -168.2(3) |
| C18 | C13 | P1  | N1  | 156.5(3)  | P1  | C13 | C14 | O1               | 10.4(5)   |
| C19 | C20 | C21 | C22 | 0.6(6)    | P1  | C13 | C18 | C17              | 167.4(3)  |
| C20 | C19 | C24 | C23 | 0.2(5)    | P1  | C19 | C20 | C21              | -178.4(3) |
| C20 | C19 | P1  | C7  | -77.4(3)  | P1  | C19 | C24 | C23              | 177.9(3)  |
| C20 | C19 | P1  | C13 | 42.7(3)   | P1  | N1  | N2  | N3               | -174.6(2) |
| C20 | C19 | P1  | N1  | 161.1(3)  | P2  | C26 | C27 | C28              | 179.4(3)  |
| C20 | C21 | C22 | C23 | 0.0(6)    | P2  | C31 | C32 | C33              | 180.0(3)  |
| C21 | C22 | C23 | C24 | -0.4(6)   | P2  | C31 | C36 | C35              | -178.2(3) |
| C22 | C23 | C24 | C19 | 0.3(6)    | P2  | C37 | C38 | C39              | 172.7(3)  |
| C24 | C19 | C20 | C21 | -0.7(6)   | P2  | C37 | C42 | C41              | -171.6(4) |
| C24 | C19 | P1  | C7  | 104.9(3)  | U1  | N1  | N2  | N3               | -9.4(3)   |
| C24 | C19 | P1  | C13 | -134.9(3) | U1  | N1  | P1  | C7               | 145.0(2)  |
| C24 | C19 | P1  | N1  | -16.6(3)  | U1  | N1  | P1  | C13              | 24.5(3)   |
| C25 | C26 | C27 | C28 | -0.5(5)   | U1  | N1  | P1  | C19              | -93.6(2)  |
| C25 | C26 | P2  | C31 | 156.0(3)  | C51 | C52 | C53 | C54              | 0.1(7)    |
| C25 | C26 | P2  | C37 | -88.7(3)  | C52 | C51 | C56 | C55              | 1.1(7)    |
| C25 | C26 | P2  | N4  | 37.6(3)   | C52 | C53 | C54 | C55              | 0.3(7)    |
| C26 | C25 | C30 | C29 | -2.2(5)   | C53 | C54 | C55 | C56              | -0.1(7)   |
| C26 | C25 | O2  | U1  | 172.4(3)  | C54 | C55 | C56 | C51              | -0.7(8)   |
| C26 | C27 | C28 | C29 | -1.4(6)   | C56 | C51 | C52 | C53              | -0.9(7)   |
| C27 | C26 | P2  | C31 | -23.9(3)  | C61 | C62 | C63 | C61 <sup>1</sup> | 0.4(7)    |

|     |     |     |     |           |                  |     |     |                  |         |
|-----|-----|-----|-----|-----------|------------------|-----|-----|------------------|---------|
| C27 | C26 | P2  | C37 | 91.4(3)   | C63 <sup>1</sup> | C61 | C62 | C63              | -0.4(7) |
| C27 | C26 | P2  | N4  | -142.4(3) | C71              | C72 | C73 | C71 <sup>2</sup> | 0.5(7)  |
| C27 | C28 | C29 | C30 | 1.5(6)    | C73 <sup>2</sup> | C71 | C72 | C73              | -0.5(7) |

<sup>1</sup>1-X,-Y,1-Z; <sup>2</sup>2-X,1-Y,1-Z

**Table S30.** Hydrogen Atom Coordinates ( $\text{\AA}\times 10^4$ ) and Isotropic Displacement Parameters ( $\text{\AA}^2\times 10^3$ ) for Complex **4**.

| Atom | x     | y    | z    | U(eq) |
|------|-------|------|------|-------|
| H2   | 5854  | 3767 | 5090 | 23    |
| H3   | 5368  | 4347 | 6025 | 25    |
| H4   | 5956  | 5558 | 6322 | 24    |
| H5   | 7006  | 6185 | 5679 | 25    |
| H8   | 6328  | 1418 | 4577 | 25    |
| H9   | 7129  | 894  | 5524 | 31    |
| H10  | 8793  | 1023 | 5726 | 36    |
| H11  | 9683  | 1686 | 4987 | 39    |
| H12  | 8886  | 2222 | 4051 | 30    |
| H15  | 7605  | 2573 | 1264 | 22    |
| H16  | 7924  | 1281 | 1162 | 26    |
| H17  | 7987  | 476  | 2065 | 27    |
| H18  | 7692  | 969  | 3086 | 24    |
| H20  | 5773  | 1122 | 3063 | 30    |
| H21  | 4123  | 858  | 2945 | 34    |
| H22  | 3022  | 1762 | 3258 | 30    |
| H23  | 3568  | 2919 | 3688 | 31    |
| H24  | 5222  | 3188 | 3823 | 24    |
| H27  | 9046  | 7715 | 3966 | 24    |
| H28  | 10131 | 7809 | 3169 | 25    |
| H29  | 10290 | 6792 | 2452 | 22    |
| H30  | 9331  | 5714 | 2501 | 20    |
| H32  | 8862  | 6437 | 5560 | 24    |
| H33  | 9359  | 7244 | 6423 | 27    |
| H34  | 8989  | 8535 | 6370 | 27    |
| H35  | 8060  | 9028 | 5469 | 24    |
| H36  | 7482  | 8218 | 4619 | 20    |
| H38  | 5892  | 6952 | 4900 | 29    |
| H39  | 4466  | 7565 | 4544 | 34    |
| H40  | 4248  | 8049 | 3484 | 38    |
| H41  | 5425  | 7851 | 2762 | 48    |
| H42  | 6843  | 7197 | 3103 | 39    |
| H51  | 9779  | 9451 | 3280 | 49    |
| H52  | 9111  | 9892 | 4225 | 53    |

|     |          |          |          |        |
|-----|----------|----------|----------|--------|
| H53 | 7457     | 9840     | 4296     | 52     |
| H54 | 6444     | 9345     | 3443     | 50     |
| H55 | 7107     | 8891     | 2511     | 51     |
| H56 | 8762     | 8933     | 2438     | 49     |
| H61 | 4216     | 1016     | 5453     | 31     |
| H62 | 3845     | 696      | 4364     | 38     |
| H63 | 4639     | -318     | 3909     | 40     |
| H71 | 9229     | 4018     | 5507     | 43     |
| H72 | 9928     | 5012     | 6130     | 38     |
| H73 | 10712    | 5992     | 5628     | 38     |
| H4A | 7830(40) | 5460(30) | 4320(30) | 32(14) |

## References

- 1) M. Shen and T. G. Driver, *Org. Lett.*, **2008**, *10*, 3367.
- 2) T. Cantat, B. L. Scott, J. L. Kiplinger, *Chem. Commun.*, **2010**, *46*, 919-921.
- 3) O. V. Dolomanov, J. Bourhis, R. J. Gildea, J. A. K. Howard and H. Puschmann, *J. Appl. Cryst.*, **2009**, *42*, 339.
- 4) (a) G. M. Sheldrick, *Acta Cryst.* **2015**, *A71*, 3–8.; (b) G. M. Sheldrick, *Acta Cryst.* **2015**, *C71*, 3
